# Supplementary material for: A 600-kyr reconstruction of deep Arctic seawater δ 18 O from benthic foraminiferal δ 18 O and ostracode Mg/Ca paleothermometry
Source: Copernicus journal article supplement (doi:10.5194/egusphere-2022-1212), 2022-11-07
Supplement: Supplementary file 1 [file Farmer_Arctic_d18Osw_CP_data.xlsx]

## Sheet: Figure 1
Data extracted from the GLODAP2020v.2 database (Olsen et al., 2020)
Cruise	Station #	Longitude [degrees_east]	Latitude [degrees_north]	DEPTH [M]	O18/O16 [/MILLE]
18AW19860910	2022	-136.32	70.28	0	-8.9
18AW19860910	2011	-133.99	70.558	0	-8.8
18AW19860910	2023	-136.23	70.187	0	-8.8
18AW19860910	2025	-136.03	70.003	0	-8.8
18AW19860910	2019	-136.72	70.623	0	-8.6
18AW19860910	2017	-134.52	70.993	0	-8.5
18AW19860910	2036	-138.36	69.745	0	-8.2
18AW19860910	2013	-136.61	70.537	0	-8
18AW19860910	2021	-136.43	70.358	0	-8
18AW19860910	2037	-138.45	69.833	0	-8
18AW19860910	2038	-138.54	69.92	0	-7.9
18AW19860910	2039	-138.63	70.017	0	-7.9
18AW19860910	2040	-138.73	70.113	0	-7.9
18AW19860910	2012	-134.01	70.65	0	-7.8
18AW19860910	2041	-138.82	70.187	0	-7.8
18AW19860910	2018	-136.85	70.793	0	-7.7
18DD19870731	4010	-143.5	72.598	0	-7.6
18AW19860910	2020	-136.52	70.448	0	-7.3
18AW19860910	2033	-138.08	69.458	0	-7.3
18AW19860910	2034	-138.17	69.555	0	-7.3
18AW19860910	2016	-134.41	70.91	0	-7.2
18AW19860910	2035	-138.28	69.485	0	-7.1
18AW19860910	2014	-134.2	70.737	0	-6.8
18AW19860910	2015	-134.3	70.82	0	-6.8
18AW19860910	2042	-138.41	69.592	0	-6.6
18SN19950803	8029	-139.98	70.538	0	-6.33
18SN19950803	8022	-141.67	71.873	0	-5.51
18SN19950803	8021	-139.34	71.206	0	-4.17
49NZ20020822	70	-142.08	71.848	0	-3.671
49NZ20020822	75	-141.72	70.563	0	-3.67
49NZ20020822	71	-142.01	71.257	0	-3.498
49NZ20020822	63	-151.34	72.501	0	-3.492
49NZ20020822	72	-141.99	71.028	0	-3.445
49NZ20020822	47	-162.56	74.246	0	-3.42
49NZ20020822	73	-141.85	70.787	0	-3.355
18SN19950803	8018	-145.36	72.986	0	-3.32
49NZ20020822	36	-157.01	73.489	0	-3.24
49NZ20020822	51	-164.11	73.668	0	-3.236
49NZ20020822	52	-164.56	73.501	0	-3.221
49NZ20020822	34	-158.01	73.166	0	-3.118
18SN20030806	14003	-150	71.263	0	-2.772
18SN19970801	10024	-74.944	78.334	0	-1.8
49NZ20020822	9	-157.98	71.335	0	-1.191
06AQ20070728	385	124.36	79.352	0	-1.168
18DD19870731	4007	-134.16	70.737	0.5	-5
18DD19870731	4008	-133.94	70.518	0.5	-4.6
189119870330	3001	-127.51	70.792	0.5	-4.1
189119870330	3008	-134.22	70.667	0.5	-4
189119870330	3010	-138.61	69.963	0.5	-4
189119870330	3002	-134.46	70.945	0.5	-3.9
189119870330	3009	-134.46	70.962	0.5	-3.7
189119870330	3003	-134.21	70.733	0.5	-3.6
189119870330	3015	-128.34	71.475	0.5	-3.6
189119870330	3016	-134.42	70.995	0.5	-3.6
189119870330	3020	-138.59	69.964	1	-17
18SN19950803	8030	-138.43	69.886	1	-6.76
18SN19950803	8026	-135.85	70.5	1	-5.61
18DL20040625	32023	-133.68	70.69	1	-5.59
18LU20000902	12003	-111.36	67.888	1	-5.51
18LU20000902	12023	-126.43	70.559	1	-5.465
18LU20000902	12006	-111.06	68.396	1	-5.231
18DD19870731	4006	-134.6	70.947	1	-5.2
18SN20080717	22006	-140.01	70.812	1	-5.0448
18LU20000902	12022	-126.5	71.298	1	-5.009
18LU20000902	12004	-111.3	68.054	1	-4.951
18LU20000902	12005	-111.21	68.27	1	-4.839
18DL20031015	26022	-126.8	71.398	1	-4.63
18DL20031015	26029	-125.57	70.915	1	-4.47
18DL20031015	26045	-127.66	71.303	1	-4.36
18DL20031015	26046	-127.12	71.497	1	-4.29
18LU20000902	12027	-121.67	70.25	1	-4.29
18DL20031015	26049	-124.51	71.485	1	-4.22
18DL20031015	26044	-128.32	71.108	1	-4.19
18DL20031015	26052	-126.47	70.945	1	-4.16
18DL20031015	26031	-125.03	70.847	1	-4.15
18DL20031015	26033	-124.44	70.781	1	-4.15
18DL20031015	26047	-126.44	71.698	1	-4.15
18DL20040625	32045	-126.48	71.702	1	-4.1
18LU20000902	12011	-118.4	69.583	1	-4.099
18LU20000902	12030	-120.08	69.981	1	-3.996
18LU20000902	12021	-130.59	71.564	1	-3.946
18LU20000902	12015	-122.92	70.545	1	-3.883
18LU20000902	12029	-120.67	69.717	1	-3.872
18LU20000902	12017	-125	70.799	1	-3.849
18DL20040625	32041	-125.84	71.123	1	-3.78
18DL20031015	26019	-127.17	71.654	1	-3.76
18SN20030806	14037	-136.91	73.498	1	-3.744
18SN20030806	14007	-150	74	1	-3.665
316N20150906	6	-52.987	69.2117	1	-3.66
18SN20030806	14033	-140.01	75.001	1	-3.647
18DL20031015	26003	-133.7	70.688	1	-3.62
18SN20030806	14006	-150	73	1	-3.532
18SN20090917	24043	-139.98	76.538	1	-3.515
18SN20030806	14010	-156.01	74.666	1	-3.497
18SN20030806	14009	-153.5	74.833	1	-3.485
18DL20031015	26016	-127.46	72.062	1	-3.46
18LU20000902	12018	-127.75	71.942	1	-3.374
18DL20040625	32047	-127.71	71.314	1	-3.36
18SN20030806	14035	-139.83	76.063	1	-3.32
18SN20030806	14012	-158.83	73.995	1	-3.291
32PZ20020819	1	-167.76	75.595	1	-3.29
18LU20000902	12012	-118.6	69.438	1	-3.27
18SN20030806	14034	-145.06	75.063	1	-3.248
18DL20040625	32042	-125.19	71.301	1	-3.19
32PZ20020819	8	-170.1	76.514	1	-2.7
18SN20030806	14020	-150.1	80.019	1	-2.573
18SN20030806	14016	-168.66	76.416	1	-2.488
18SN20030806	14018	-165.24	77.865	1	-2.47
06AQ20070728	358	151.98	86.504	1	-2.284
18SN20030806	14004	-150	71.499	1	-2.165
316N20150906	5	-52.9127	69.1045	1	-2.08
316N20150906	2	-52.825	68.9773	1	-1.86
316N20150906	46	-60.1455	68.45	1	-1.84
18SN20030806	14002	-150	71.2	1	-1.83
316N20150906	45	-60.5022	68.396	1	-1.83
316N20150906	20	-58.3773	66.9335	1	-1.77
316N20150906	48	-59.692	68.4967	1	-1.72
316N20150906	50	-59.3478	68.5387	1	-1.6
316N20150906	53	-58.4	68.657	1	-1.24
06AQ20070728	279	86.179	81.23	1	-0.928
06AQ20070728	278	84.054	81.531	1	-0.82
316N20150906	60	-54.3017	69.1665	1	-0.78
18HU20050904	9	-55.8302	67.1615	1	-0.72
316N20150906	55	-56.9953	68.831	1	-0.67
06AQ20070728	267	61.283	82.966	1	-0.144
189119870330	3017	-134.18	70.725	1.15	-3.8
18SN20070726	19018	-140.05	70.582	2	-7.381
18SN19950803	8027	-137.35	70.376	2	-6.42
18SN19950803	8024	-136.92	70.48	2	-6.24
18SN20080717	22012	-144.7	72.686	2	-6.1326
18SN20070726	19097	-143.83	72.646	2	-5.144
18DL20031015	26024	-126.52	71.232	2	-4.63
18DL20031015	26025	-126.38	71.148	2	-4.59
18DL20031015	26028	-125.84	70.958	2	-4.5
18LU20000902	12014	-122.94	70.04	2	-4.488
18DL20031015	26023	-126.63	71.315	2	-4.47
18DL20031015	26054	-127.72	70.591	2	-4.39
18DL20031015	26055	-126.54	69.924	2	-4.34
18DL20031015	26055	-126.54	69.924	2	-4.34
18SN19950803	8013	-95.944	72.11	2	-4.3
18DL20031015	26030	-125.29	70.891	2	-4.27
18DL20031015	26034	-124.23	70.74	2	-4.22
18DL20031015	26042	-126.5	69.923	2	-4.2
18DL20031015	26051	-125.8	71.118	2	-4.193
18DL20031015	26032	-124.71	70.82	2	-4.15
18DL20031015	26053	-127.15	70.769	2	-4.13
18DL20040625	32005	-133.69	70.944	2	-4.04
06AQ20070728	331	-157.6	87.652	2	-4.017
18DL20040625	32057	-124.84	70.321	2	-3.97
18DL20040625	32046	-127.08	71.515	2	-3.91
06AQ20070728	351	-170.76	85.746	2	-3.904
18SN20090917	24019	-150.05	72.493	2	-3.869
18DL20040625	32048	-128.31	71.113	2	-3.79
18DL20040625	32040	-125.85	70.943	2	-3.7
18SN20090917	24014	-140	70.999	2	-3.671
18DL20040625	32043	-124.54	71.483	2	-3.63
18LU20000902	12019	-126.65	71.942	2	-3.533
18DL20040625	32022	-133.84	71.21	2	-3.51
32H120020505	11	-159.57	73.608	2	-3.51
32H120020718	31	-157.4	73.421	2	-3.51
32H120020718	32	-159.09	73.707	2	-3.48
18SN20030806	14011	-158.02	74.492	2	-3.465
32H120020505	34	-154.5	72.534	2	-3.46
18SN20090917	24032	-154.01	78.329	2	-3.459
32H120020718	17	-153.3	72.507	2	-3.45
18DL20031015	26015	-128.37	72.01	2	-3.42
32H120020505	12	-157.54	73.439	2	-3.41
32H120020718	29	-158.22	72.881	2	-3.41
32H120020718	29	-158.22	72.881	2	-3.41
32H120020718	31	-157.4	73.421	2	-3.39
18SN20030806	14014	-162.06	74.364	2	-3.383
32H120020718	43	-165.4	73.63	2	-3.38
32H120020505	10	-159.84	73.449	2	-3.32
32H120020718	27	-158.44	72.733	2	-3.3
32H120020505	14	-158.15	73.099	2	-3.29
32H120020505	18	-158.62	72.746	2	-3.28
32H120020505	16	-158.28	72.875	2	-3.27
32PZ20020819	34	-170.1	80.198	2	-3.27
18DL20040806	33001	-126.28	70.04	2	-3.26
32H120020505	17	-158.49	72.851	2	-3.26
18DL20040625	32004	-133.9	71.451	2	-3.22
32H120020505	8	-160.01	73.247	2	-3.2
32H120020505	24	-155.69	71.813	2	-3.17
32H120020505	33	-154.4	72.187	2	-3.14
18SN19950803	8012	-96.028	73.361	2	-3.07
32H120020505	31	-154.82	71.928	2	-3.04
32H120020505	9	-160.13	73.282	2	-3.03
32H120020505	35	-155.05	72.184	2	-3
32PZ20020819	5	-168.96	76.085	2	-3
32H120020505	7	-160.38	73.036	2	-2.99
32H120020505	31	-154.82	71.928	2	-2.98
06AQ20070728	322	150.12	88.129	2	-2.917
32H120020505	32	-154.47	72.073	2	-2.91
18SN19950803	8012	-96.028	73.361	2	-2.86
18SN20030806	14019	-159.91	79.147	2	-2.709
32H120020505	30	-154.63	71.833	2	-2.66
32H120020505	37	-155.76	71.65	2	-2.61
32H120020505	29	-154.4	71.779	2	-2.51
32PZ20020819	10	-176.35	76.474	2	-2.39
32PZ20020819	9	-175.22	76.48	2	-2.37
06AQ20070728	312	120.18	88.118	2	-2.176
18DL20040625	32039	-126.3	70.046	2	-2.17
18HU20050904	44	-62.767	67.6257	2	-2.14
316N20150906	34	-62.769	67.6255	2	-2.13
316N20061001	25	-60.81	66.6933	2	-2.11
316N20150906	36	-62.4867	67.7228	2	-2.09
316N20100804	11	-60.973	66.675	2	-2.07
06AQ20070728	377	115.48	83.415	2	-2.027
316N20150906	44	-61.212	68.3168	2	-2.02
316N20071003	4	-60.8117	66.694	2	-2
316N20150906	25	-60.9735	66.6745	2	-2
316N20150906	38	-62.21	67.85	2	-1.99
316N20040922	16	-60.1405	66.757	2	-1.97
316N20150906	26	-60.8123	66.6953	2	-1.95
316N20150906	27	-60.4805	66.7323	2	-1.91
18HU20050904	48	-62.3612	67.7682	2	-1.9
06AQ20070728	403	123.12	77.15	2	-1.874
316N20150906	21	-59.0547	66.8525	2	-1.85
316N20080901	29	-61.4987	68.1655	2	-1.84
316N20071003	2	-60.0702	66.7602	2	-1.83
18HU20050904	52	-61.4813	68.1788	2	-1.8
06AQ20070728	402	123.19	77.215	2	-1.786
32H120020718	14	-155.02	71.829	2	-1.78
18DL20031015	26004	-133.88	70.923	2	-1.77
06AQ20070728	397	123.6	77.634	2	-1.736
06AQ20070728	394	123.93	77.863	2	-1.713
316N20150906	19	-57.6613	66.9748	2	-1.69
06AQ20070728	401	123.35	77.299	2	-1.677
32H120020718	12	-157.75	71.379	2	-1.65
316N20130914	42	-53.0022	69.2382	2	-1.65
06AQ20070728	383	122.22	80.659	2	-1.642
316N20080901	36	-59.3382	68.539	2	-1.61
06AQ20070728	400	123.4	77.388	2	-1.602
316N20071003	9	-56.3107	67.1042	2	-1.55
316N20150906	41	-61.4878	68.1793	2	-1.55
06AQ20070728	391	124.24	78.13	2	-1.542
18SN20070726	19058	-150.01	79.989	2	-1.444
32H120020718	20	-152.29	71.696	2	-1.44
32H120020505	39	-157.19	71.404	2	-1.37
18HU20050904	22	-59.0553	66.8517	2	-1.35
06AQ20070728	387	124.61	78.638	2	-1.212
18HU20050904	75	-57.6885	66.9817	2	-1.17
316N20150906	18	-57.3583	67.0127	2	-1.15
316N20130914	34	-58.4002	68.6562	2	-1.07
06AQ20070728	284	86.201	82.021	2	-1.04
316N20100804	73	-55.587	68.378	2	-1.03
06AQ20070728	281	86.257	81.576	2	-1.011
06AQ20070728	283	86.112	81.869	2	-0.968
316N20130914	51	-53.7382	68.748	2	-0.95
06AQ20070728	282	86.219	81.715	2	-0.909
316N20130914	40	-54.3003	69.1665	2	-0.85
316N20150906	14	-56.3153	67.1067	2	-0.82
316N20071003	40	-56.2933	68.9197	2	-0.81
06AQ20070728	280	86.249	81.415	2	-0.783
316N20130914	53	-54.6338	68.5005	2	-0.74
316N20150906	1	-52.7415	68.8533	2	-0.74
316N20150906	12	-55.8222	67.1608	2	-0.74
18HU20050904	12	-56.315	67.115	2	-0.7
316N20150906	16	-57.037	67.0333	2	-0.7
316N20150906	15	-56.675	67.068	2	-0.69
316N20150906	58	-55.5952	69.0062	2	-0.68
316N20130914	8	-57.0388	67.0392	2	-0.67
316N20150906	62	-54.8935	68.5017	2	-0.67
316N20150906	63	-54.3727	68.5023	2	-0.64
316N20130914	6	-56.3162	67.1082	2	-0.6
18HU20050904	13	-56.6815	67.0778	2	-0.59
316N20040922	6	-56.7033	67.09	2	-0.59
06AQ20070728	277	83.831	82.392	2	-0.562
06AQ20070728	287	86.194	82.334	2	-0.394
06AQ20070728	297	87.237	83.588	2	-0.391
06AQ20070728	288	86.334	82.419	2	-0.171
06AQ20070728	269	60.605	82.733	2	-0.152
06AQ20070728	289	86.263	82.501	2	-0.123
06AQ20070728	292	86.284	82.814	2	-0.115
06AQ20070728	260	36.139	84.489	2	-0.112
316N20130914	7	-56.6745	67.0688	2	-0.07
06AQ20070728	275	66.959	82.183	2	0.002
06AQ20070728	274	67.112	82.521	2	0.02
06AQ20070728	293	86.268	82.968	2	0.049
06AQ20070728	290	86.423	82.58	2	0.065
06AQ20070728	238	33.997	80.494	2	0.076
06AQ20070728	252	34.037	82.251	2	0.084
06AQ20070728	273	64.753	82.212	2	0.091
06AQ20070728	256	33.877	82.858	2	0.153
06AQ20070728	264	60.429	83.642	2	0.167
06AQ20070728	240	34.004	81.499	2	0.19
06AQ19930806	6	30.583	81.205	2.473	0.05
18AW19860910	2024	-136.13	70.097	3	-8.8
18AW19860910	2017	-134.52	70.993	3	-8.3
18AW19860910	2018	-136.85	70.793	3	-7.9
18AW19860910	2021	-136.43	70.358	3	-7.9
18AW19860910	2035	-138.28	69.485	3	-6.3
18AW19860910	2014	-134.2	70.737	3	-6.2
18LU20000902	12003	-111.36	67.888	3	-5.509
18LU20000902	12023	-126.43	70.559	3	-5.361
18LU20000902	12022	-126.5	71.298	3	-4.881
18LU20000902	12005	-111.21	68.27	3	-4.853
18LU20000902	12024	-127.21	70.431	3	-4.669
18LU20000902	12014	-122.94	70.04	3	-4.563
316N20100804	111	-51.2445	69.2057	3	-4.44
18DL20031015	26034	-124.23	70.74	3	-4.21
18LU20000902	12030	-120.08	69.981	3	-4.002
316N20100804	110	-51.2517	69.184	3	-3.84
18LU20000902	12017	-125	70.799	3	-3.802
18LU20000902	12029	-120.67	69.717	3	-3.709
18LU20000902	12019	-126.65	71.942	3	-3.64
18SN20090917	24028	-150.12	78.019	3	-3.596
18SN20070726	19046	-150	76.999	3	-3.587
18LU20000902	12018	-127.75	71.942	3	-3.351
18LU20000902	12011	-118.4	69.583	3	-3.338
316N20100804	43	-54.301	69.166	3	-2.65
316N20100804	86	-53.7395	68.7483	3	-2.56
316N20100804	21	-62.764	67.625	3	-2.52
316N20061001	24	-60.9727	66.6743	3	-2.46
316N20071003	5	-60.9727	66.6757	3	-2.37
316N20061001	71	-62.7667	67.6237	3	-2.36
316N20080901	61	-61.1933	66.2497	3	-2.3
316N20100804	12	-60.812	66.695	3	-2.2
316N20061001	74	-62.3622	67.7677	3	-2.19
18HU20050904	45	-62.6083	67.6772	3	-2.14
316N20080901	22	-62.6107	67.6762	3	-2.12
316N20061001	72	-62.608	67.6763	3	-2.11
316N20080901	24	-62.3605	67.7695	3	-2.07
316N20080901	57	-59.4197	66.2478	3	-2.06
316N20100804	23	-62.477	67.722	3	-2.06
316N20080901	59	-60.3087	66.2498	3	-2.05
316N20100804	6	-56.31	67.106	3	-2.04
316N20100804	13	-60.476	66.733	3	-2.02
316N20130914	18	-60.971	66.6695	3	-2.02
316N20100804	25	-62.222	67.845	3	-2.01
316N20130914	12	-59.057	66.852	3	-2.01
316N20130914	14	-60.0675	66.7587	3	-2.01
316N20150906	40	-61.7717	68.0472	3	-2.01
316N20080901	13	-59.6213	66.826	3	-2
316N20061001	27	-60.0705	66.7605	3	-1.98
316N20130914	11	-58.3777	66.9338	3	-1.98
316N20040922	20	-60.9817	66.6732	3	-1.97
316N20130914	15	-60.4822	66.7295	3	-1.97
316N20130914	16	-60.8118	66.6918	3	-1.96
316N20111002	17	-60.9728	66.6742	3	-1.93
18HU20050904	39	-60.9723	66.6743	3	-1.92
316N20150906	29	-60.0367	66.7598	3	-1.91
18HU20050904	41	-60.8097	66.6935	3	-1.9
316N20040922	18	-60.8063	66.6902	3	-1.9
316N20130914	10	-57.6625	66.9743	3	-1.9
316N20130914	13	-59.6207	66.8248	3	-1.88
316N20061001	31	-57.6723	66.9792	3	-1.86
316N20100804	90	-53.2672	68.9267	3	-1.86
316N20130914	22	-62.2228	67.843	3	-1.86
316N20100804	96	-53.0023	69.2387	3	-1.85
316N20100804	29	-61.2	68.308	3	-1.84
316N20100804	103	-52.696	69.0887	3	-1.84
316N20071003	56	-59.427	66.2503	3	-1.82
316N20040922	1	-59.0843	66.8448	3	-1.8
316N20061001	29	-59.0642	66.854	3	-1.79
316N20091006	12	-58.0775	66.8503	3	-1.77
316N20100804	31	-60.153	68.439	3	-1.74
316N20100804	71	-55.591	68.198	3	-1.71
316N20100804	101	-52.7403	68.8548	3	-1.7
316N20100804	15	-59.62	66.826	3	-1.66
316N20100804	16	-59.057	66.852	3	-1.65
316N20071003	10	-55.8195	67.161	3	-1.57
316N20100804	61	-59.091	67.403	3	-1.51
316N20080901	34	-59.69	68.4965	3	-1.49
316N20100804	8	-57.037	67.034	3	-1.45
316N20100804	106	-52.113	69.0252	3	-1.44
316N20130914	27	-60.4998	68.3945	3	-1.38
316N20100804	37	-58.396	68.658	3	-1.36
316N20080901	37	-59.0977	68.5695	3	-1.32
316N20100804	94	-52.9612	69.1128	3	-1.3
316N20100804	5	-55.819	67.16	3	-1.29
316N20111002	5	-55.8228	67.1615	3	-1.29
316N20071003	49	-56.987	66.2498	3	-1.27
316N20080901	11	-57.0397	67.0358	3	-1.26
316N20100804	17	-58.379	66.934	3	-1.24
06AQ20070728	386	124.55	78.939	3	-1.232
316N20071003	33	-59.6895	68.496	3	-1.23
316N20130914	9	-57.3588	67.0123	3	-1.18
316N20130914	46	-52.825	68.9802	3	-1.18
316N20071003	8	-56.687	67.072	3	-1.17
316N20071003	36	-59.0912	68.5685	3	-1.15
316N20071003	46	-55.9965	66.2488	3	-1.14
316N20071003	42	-54.891	69.0928	3	-1.13
316N20080901	50	-56.9895	66.2483	3	-1.1
316N20071003	48	-56.6555	66.2488	3	-1.09
316N20130914	50	-53.2695	68.9262	3	-1.09
316N20100804	82	-54.629	68.502	3	-1.06
316N20111002	10	-57.6737	66.978	3	-1.03
316N20100804	79	-56.002	68.384	3	-1.01
316N20111002	6	-56.3188	67.1063	3	-1.01
316N20130914	48	-52.7383	68.8548	3	-0.99
316N20080901	51	-57.3217	66.2495	3	-0.95
316N20080901	39	-57.695	68.7452	3	-0.94
316N20100804	66	-57.531	67.598	3	-0.92
316N20040922	3	-57.6662	66.9742	3	-0.91
316N20061001	34	-56.6743	67.066	3	-0.89
316N20061001	35	-56.308	67.1063	3	-0.84
316N20100804	39	-56.996	68.833	3	-0.84
316N20130914	55	-55.4953	68.3815	3	-0.83
316N20091006	1	-56.6897	67.0692	3	-0.82
316N20100804	78	-55.592	68.869	3	-0.8
316N20080901	41	-56.2938	68.918	3	-0.78
316N20091006	8	-57.0514	67.0367	3	-0.77
316N20040922	7	-56.3023	67.1067	3	-0.76
316N20100804	41	-55.593	69.004	3	-0.76
316N20080901	43	-54.8908	69.0933	3	-0.74
316N20040922	8	-55.8228	67.162	3	-0.72
316N20130914	5	-55.822	67.1608	3	-0.68
316N20080901	42	-55.595	69.0057	3	-0.66
18HU20050904	15	-57.0352	67.0455	3	-0.55
58AA20000923	125	19.288	76.96	3	-0.111
06AQ20070728	249	33.991	81.996	3	0.094
06AQ20070728	234	34.001	76.503	3	0.151
06AQ20070728	228	33.998	75	3	0.19
06AQ20070728	231	34	75.749	3	0.205
06AQ19870704	269	31.403	81.272	3	0.25
189119870330	3020	-138.59	69.964	3.5	-16.8
18LU20000902	12006	-111.06	68.396	4	-5.24
18LU20000902	12004	-111.3	68.054	4	-5.059
18LU20000902	12027	-121.67	70.25	4	-4.254
18DL20031015	26042	-126.5	69.923	4	-4.22
18DL20031015	26051	-125.8	71.118	4	-4.21
18DL20031015	26036	-121.03	70.584	4	-4.19
18DL20031015	26044	-128.32	71.108	4	-4.18
18DL20031015	26036	-121.03	70.584	4	-4.16
ZZIC2005SWYD	81	-67.142	84.941	4	-3.93
316N20100804	109	-51.2278	69.1525	4	-3.87
18DL20040625	32041	-125.84	71.123	4	-3.78
18SN20150920	11	-139.995	76.0023	4	-3.68
18LU20000902	12012	-118.6	69.438	4	-3.637
18LU20000902	12021	-130.59	71.564	4	-3.361
18DL20040625	32042	-125.19	71.301	4	-3.22
18SN20050729	15031	-146.7	77.702	4	-2.7506
316N20080901	21	-62.7653	67.6237	4	-2.59
316N20100804	28	-61.486	68.179	4	-2.57
316N20091006	64	-61.2042	66.2511	4	-2.55
316N20091006	25	-62.7778	67.6281	4	-2.41
316N20111002	11	-58.379	66.9353	4	-2.39
316N20091006	17	-60.9783	66.6794	4	-2.31
316N20091006	14	-60.0708	66.7614	4	-2.3
316N20091006	16	-60.8172	66.6989	4	-2.28
316N20091006	15	-60.4797	66.7403	4	-2.25
316N20071003	60	-61.1928	66.2495	4	-2.21
316N20071003	22	-62.6142	67.6755	4	-2.18
316N20080901	17	-60.9735	66.6745	4	-2.17
316N20080901	16	-60.8105	66.6925	4	-2.16
316N20091006	32	-61.4897	68.1856	4	-2.16
316N20091006	33	-61.2078	68.3122	4	-2.15
18DL20040625	32039	-126.3	70.046	4	-2.14
316N20100804	27	-61.77	68.049	4	-2.09
316N20080901	55	-58.649	66.2532	4	-2.06
316N20130914	20	-62.7682	67.6248	4	-2.05
316N20130914	21	-62.487	67.7215	4	-2.05
316N20080901	53	-57.9843	66.2497	4	-2.01
316N20091006	13	-59.6225	66.8328	4	-1.93
316N20100804	14	-60.072	66.76	4	-1.88
316N20091006	63	-60.7542	66.25	4	-1.86
316N20111002	13	-59.6227	66.8262	4	-1.86
316N20130914	24	-61.7708	68.0482	4	-1.85
316N20150906	30	-59.6233	66.8255	4	-1.85
316N20071003	24	-62.3652	67.7647	4	-1.84
316N20071003	28	-61.4885	68.1783	4	-1.84
316N20100804	33	-59.664	68.499	4	-1.84
316N20130914	26	-61.2013	68.308	4	-1.84
316N20111002	30	-60.499	68.3948	4	-1.83
316N20111002	16	-60.8072	66.6917	4	-1.81
316N20080901	27	-61.771	68.0472	4	-1.8
316N20100804	30	-60.53	68.404	4	-1.8
316N20071003	26	-62.0573	67.9183	4	-1.79
316N20111002	25	-62.2252	67.8447	4	-1.79
316N20111002	21	-62.7683	67.6242	4	-1.78
316N20111002	29	-61.2005	68.3082	4	-1.73
316N20091006	11	-58.3875	66.9375	4	-1.72
316N20080901	31	-60.4992	68.394	4	-1.66
316N20100804	35	-59.343	68.538	4	-1.62
316N20111002	31	-60.1512	68.4385	4	-1.61
316N20061001	78	-61.4843	68.1775	4	-1.59
316N20080901	10	-56.6752	67.0692	4	-1.51
316N20100804	7	-56.675	67.068	4	-1.51
316N20080901	8	-57.6753	66.9792	4	-1.5
316N20111002	37	-58.3977	68.6583	4	-1.46
316N20130914	30	-59.6905	68.4982	4	-1.43
316N20130914	28	-60.1537	68.438	4	-1.42
316N20080901	6	-56.3063	67.1052	4	-1.36
316N20080901	7	-58.3827	66.9363	4	-1.35
316N20071003	54	-58.649	66.2502	4	-1.3
316N20071003	18	-59.0585	66.8517	4	-1.26
316N20080901	38	-58.3902	68.6573	4	-1.23
316N20091006	37	-59.6931	68.5083	4	-1.22
316N20111002	35	-59.3407	68.5392	4	-1.2
316N20071003	30	-60.4972	68.3948	4	-1.19
316N20111002	39	-56.9932	68.8322	4	-1.19
316N20130914	32	-59.3432	68.539	4	-1.17
316N20080901	5	-55.821	67.1608	4	-1.16
316N20111002	15	-60.4715	66.7315	4	-1.16
316N20111002	9	-57.3638	67.0188	4	-1.14
316N20111002	41	-55.5908	69.0058	4	-1.12
316N20100804	9	-57.362	67.018	4	-1.07
316N20080901	49	-56.6565	66.25	4	-1.06
316N20071003	52	-57.9878	66.2485	4	-1.05
316N20091006	10	-57.6836	66.9844	4	-1.04
316N20091006	39	-59.3519	68.5419	4	-1.04
316N20071003	7	-57.0492	67.0342	4	-1.01
316N20061001	37	-55.813	67.1625	4	-1
316N20071003	35	-59.3438	68.5383	4	-1
316N20091006	40	-59.1097	68.5714	4	-0.97
316N20111002	8	-57.0372	67.0355	4	-0.96
316N20080901	40	-56.9955	68.832	4	-0.9
316N20061001	33	-57.0375	67.0382	4	-0.85
316N20091006	2	-56.3097	67.1086	4	-0.83
316N20091006	52	-56.6589	66.2519	4	-0.82
316N20091006	7	-55.8275	67.1697	4	-0.81
316N20080901	44	-54.3003	69.1667	4	-0.74
316N20091006	55	-57.6533	66.2608	4	-0.74
316N20130914	38	-55.5917	69.0048	4	-0.74
316N20071003	38	-57.697	68.7432	4	-0.72
316N20091006	54	-57.3247	66.2522	4	-0.67
316N20130914	36	-56.9988	68.8318	4	-0.66
316N20091006	41	-58.4003	68.6628	4	-0.6
06AQ20070728	261	60.934	84.645	4	-0.296
06AQ20070728	268	60.797	82.806	4	-0.039
58HJ20120807	580	29.997	80.919	4	-0.01
58AA20000923	78	19.302	77.2	4	0.043
58HJ20120807	583	30.02	81.482	4	0.11
58HJ20120807	603	5.4405	81.058	4	0.18
58HJ20120807	598	11.546	80.32	4	0.34
58HJ20120807	599	11.095	80.432	4	0.69
49NZ20020822	50	-163.7	73.808	4.1	-3.016
49NZ20020822	48	-162.89	74.124	4.3	-3.438
49NZ20040901	36	-172	74.67	4.6	-3.36
77DN19910726	4	19.84	81.34	4.65	0
49NZ20020822	33	-158.49	73.002	4.7	-3.282
49NZ20020822	59	-155.14	73.502	4.7	-3.246
49NZ20020822	140	-168.47	76.245	4.7	-2.994
49NZ20040901	45	-173.96	76.255	4.7	-1.95
06AQ19930806	30	101.76	77.882	4.749	-3.21
49NZ20020822	89	-127.44	70.749	4.8	-4.927
49NZ20020822	49	-163.23	74.001	4.8	-3.435
49NZ20040901	19	-160	73.633	4.8	-2.74
49NZ20040901	80	-166.99	75.997	4.8	-1.93
49NZ20020822	68	-142	72.819	4.9	-3.817
49NZ20020822	74	-141.78	70.7	4.9	-3.305
49NZ20020822	32	-158.8	72.901	4.9	-3.273
49NZ20040901	35	-171.98	74.994	4.9	-3.22
49NZ20020822	35	-157.47	73.346	4.9	-3.201
49NZ20040901	18	-161	73.48	4.9	-2.97
49NZ20040901	132	-167.08	74.46	4.9	-2.87
49NZ20040901	52	179.92	75.368	4.9	-2.61
77DN19910726	9	42.3	85.07	4.946	-0.29
06AQ19930806	28	102.32	78.035	4.947	-3.24
18AW19860910	2024	-136.13	70.097	5	-8.5
18AW19860910	2017	-134.52	70.993	5	-8.4
18AW19860910	2018	-136.85	70.793	5	-7.8
18AW19860910	2038	-138.54	69.92	5	-7.8
18SN20070726	19032	-150.07	72.51	5	-6.782
18AW19860910	2035	-138.28	69.485	5	-6.4
18AW19860910	2014	-134.2	70.737	5	-6.1
18SN20070726	19020	-139.97	70.401	5	-5.891
18AW19860910	2021	-136.43	70.358	5	-5.7
18SN20070726	19021	-140	70.23	5	-5.511
18DL20040625	32023	-133.68	70.69	5	-5.48
06AQ20070728	349	-164.47	85.064	5	-4.525
18DL20031015	26045	-127.66	71.303	5	-4.35
18DL20031015	26054	-127.72	70.591	5	-4.35
18DL20031015	26055	-126.54	69.924	5	-4.28
18DL20031015	26047	-126.44	71.698	5	-4.17
18DL20031015	26052	-126.47	70.945	5	-4.13
18DL20031015	26049	-124.51	71.485	5	-4.12
18DL20031015	26053	-127.15	70.769	5	-4.07
18SN20150920	9	-139.474	75.265	5	-3.81
18SN20150920	32	-153.295	75.2998	5	-3.78
18SN20150920	31	-159.995	75.9897	5	-3.75
18SN20150920	67	-140.025	70.231	5	-3.75
18DL20040625	32040	-125.85	70.943	5	-3.74
18SN20150920	35	-149.982	76.9903	5	-3.74
18DL20040625	32048	-128.31	71.113	5	-3.73
18DL20040625	32045	-126.48	71.702	5	-3.69
18SN20150920	2	-122.919	70.541	5	-3.69
77YM19800811	168	-3.51999	81.717	5	-3.62
18SN20150920	42	-149.999	72.998	5	-3.57
18SN20070726	19041	-157.1	75.747	5	-3.559
18SN20080717	22064	-140	74.032	5	-3.5565
18SN20150920	65	-139.996	70.5733	5	-3.55
18SN20150920	50	-150.231	71.9633	5	-3.54
18SN20060805	16030	-157.17	75.477	5	-3.538
18SN20150920	18	-139.988	78.0028	5	-3.53
18SN20150920	19	-142.95	78.0137	5	-3.53
18SN20070726	19013	-140.05	71.99	5	-3.508
18SN20150920	4	-134.002	72.3497	5	-3.49
18DL20040625	32022	-133.84	71.21	5	-3.44
18DL20040625	32047	-127.71	71.314	5	-3.4
18SN20080717	22062	-140	75	5	-3.3874
18SN20060805	16026	-156.28	75.588	5	-3.361
18SN20060805	16025	-157.21	75.735	5	-3.326
49NZ20040901	21	-157.5	74.017	5	-3.32
18SN20150920	3	-131.876	71.7792	5	-3.31
18SN20070726	19030	-150.31	71.984	5	-3.275
18SN20060805	16045	-140.09	77.919	5	-3.253
18DL20040625	32004	-133.9	71.451	5	-3.24
18SN20080717	22003	-131.76	71.828	5	-3.2371
18SN20070726	19102	-134.3	72.271	5	-3.226
18SN20060805	16014	-139.98	71.998	5	-3.203
18SN20070726	19056	-154.01	78.329	5	-3.187
18SN20050729	15006	-131.82	71.769	5	-3.182
06AQ20070728	338	-135.04	85.704	5	-3.177
32PZ20020819	2	-168.53	75.948	5	-3.17
18SN20070726	19005	-129.97	73.777	5	-3.154
18SN20070726	19057	-154.32	78.337	5	-3.134
18SN20070726	19027	-151.66	71.502	5	-3.123
18DL20040625	32043	-124.54	71.483	5	-3.04
18SN20080717	22044	-149.99	83.029	5	-3.0146
18SN20070726	19026	-151.8	71.465	5	-2.974
18SN20060805	16039	-153.21	78.301	5	-2.887
18SN20050729	15016	-149.99	73.002	5	-2.8819
18SN20060805	16012	-131.78	71.817	5	-2.867
18DL20031015	26003	-133.7	70.688	5	-2.67
ZZIC2005SWYD	73	-66.461	84.902	5	-2.65
ZZIC2005SWYD	63	-68.703	85.933	5	-2.63
18SN20070726	19023	-152.22	71.326	5	-2.496
316N20071003	21	-62.7675	67.6238	5	-2.43
18SN20070726	19025	-152.04	71.401	5	-2.418
18SN20060805	16018	-152.21	71.33	5	-2.249
316N20091006	26	-62.6169	67.6808	5	-2.17
06AQ20070728	309	104.79	87.046	5	-2.126
316N20080901	15	-60.4825	66.7282	5	-2.09
06AQ20070728	316	139.62	88.177	5	-2.065
316N20150906	25	-60.9735	66.6745	5	-2.06
316N20150906	26	-60.8123	66.6953	5	-2.01
316N20130914	16	-60.8118	66.6918	5	-1.99
316N20091006	28	-62.3739	67.7675	5	-1.97
316N20130914	18	-60.971	66.6695	5	-1.96
316N20130914	12	-59.057	66.852	5	-1.93
316N20071003	58	-60.3117	66.2498	5	-1.9
316N20130914	25	-61.4888	68.1772	5	-1.89
316N20150906	29	-60.0367	66.7598	5	-1.88
316N20111002	28	-61.4847	68.178	5	-1.86
316N20150906	27	-60.4805	66.7323	5	-1.84
316N20150906	19	-57.6613	66.9748	5	-1.73
316N20091006	34	-60.5097	68.4017	5	-1.72
18DL20031015	26004	-133.88	70.923	5	-1.71
316N20130914	9	-57.3588	67.0123	5	-1.27
316N20071003	50	-57.3225	66.2472	5	-1.14
316N20080901	47	-55.9927	66.2507	5	-1.13
316N20071003	16	-57.6735	66.98	5	-0.98
316N20091006	46	-54.8964	69.0994	5	-0.74
316N20130914	8	-57.0388	67.0392	5	-0.67
316N20130914	6	-56.3162	67.1082	5	-0.62
316N20091006	44	-56.3044	68.9214	5	-0.59
316N20091006	42	-57.7025	68.7497	5	-0.58
58AA20000923	202	18.692	77.51	5	-0.206
06AQ20070728	276	68.96	82.084	5	-0.193
58AA20000923	63	26.503	78.3	5	-0.159
58AA20000923	46	30.2	79.57	5	-0.155
58AA20000923	60	22.355	78.92	5	-0.143
58AA20000923	83	19.198	78.08	5	-0.142
58AA20000923	41	31.932	79.27	5	-0.083
06AQ20070728	271	60.795	82.503	5	-0.071
58AA20000923	170	24.737	78.45	5	-0.044
58AA20000923	187	19.052	76.64	5	0.004
58AA20000923	57	23.473	79.15	5	0.015
06AQ20070728	266	61.741	83.138	5	0.031
58AA20000923	56	24.008	79.09	5	0.036
06AQ20070728	236	34	77.497	5	0.048
58HJ20120807	582	29.982	81.415	5	0.2
06AQ20070728	239	33.984	80.993	5	0.222
58HJ20120807	581	30.008	81.165	5	0.89
06AQ19930806	29	102.17	77.693	5.046	-2.57
06AQ19930806	9	30.517	81.533	5.046	-0.01
49NZ20020822	69	-142.13	72.49	5.1	-3.68
49NZ20040901	41	-174	75.25	5.1	-2.65
49NZ20020822	10	-156.72	71.504	5.1	-1.394
77DN19910726	16	69.7	87.61	5.144	-1.98
06AQ19930806	9	30.517	81.533	5.145	0
49NZ20020822	67	-146	72.002	5.2	-2.899
49NZ20040901	154	-155.67	72	5.2	-2.28
49NZ20040901	83	-165.6	76.184	5.2	-2.11
49NZ20040901	166	-157.31	72.701	5.2	-1.71
49NZ20040901	82	-163.34	75.498	5.3	-3.32
49NZ20020822	139	-166.97	75.726	5.3	-3.311
49NZ20040901	62	-166.91	75.166	5.3	-3.22
49NZ20040901	79	-169.99	74.331	5.3	-3.15
49NZ20040901	112	-151.98	74.007	5.3	-3.15
49NZ20040901	110	-154	74.501	5.3	-3.12
49NZ20040901	56	-178	76.044	5.3	-2.04
49NZ20040901	98	-161.66	75.917	5.4	-3.45
49NZ20040901	124	-162	75.007	5.4	-3.11
49NZ20040901	78	-168.83	74.002	5.4	-2.95
49NZ20040901	63	-165.75	74.999	5.5	-3.23
49NZ20040901	116	-154	73.501	5.5	-3.23
49NZ20040901	49	-177.88	75.452	5.5	-2.25
49NZ20040901	160	-153.83	71.86	5.5	-2
49NZ20040901	90	-168.51	76.25	5.5	-1.82
49NZ20040901	146	-159.67	73.067	5.6	-2.28
49NZ20040901	43	-174.01	75.586	5.7	-1.83
06AQ19930806	14	30.313	81.68	5.936	-0.05
18SN20070726	19018	-140.05	70.582	6	-6.85
18SN20070726	19033	-149.98	72.998	6	-5.483
18SN20050729	15009	-140	70.585	6	-5.2668
18LU20000902	12006	-111.06	68.396	6	-4.992
18SN20080717	22008	-140	70.23	6	-4.4436
18SN20080717	22069	-144.7	72.601	6	-4.3061
18SN20070726	19016	-140.05	70.814	6	-4.279
18DL20031015	26050	-125.18	71.306	6	-4.27
18SN20080717	22067	-140	73.001	6	-4.2131
18SN20070726	19099	-145.37	73.011	6	-4.16
18SN20080717	22004	-140.01	71.586	6	-4.051
18SN20090917	24024	-153.28	75.302	6	-3.933
18SN20080717	22022	-147.74	74.5	6	-3.8363
18SN20090917	24025	-150	75.001	6	-3.799
18SN20080717	22005	-140	71.001	6	-3.7988
18SN20150920	57	-138.02	73.4523	6	-3.77
18SN20150920	61	-140.001	72.0018	6	-3.76
ZZIC2005SWYD	93	-67.093	84.987	6	-3.72
18SN20150920	29	-153.281	78.2723	6	-3.72
18SN20150920	25	-149.907	78.9972	6	-3.71
18SN20090917	24006	-137.95	73.484	6	-3.697
18SN20050729	15022	-147.75	75.754	6	-3.6698
18SN20090917	24007	-139.9	73.002	6	-3.642
18SN20090917	24015	-151.23	71.658	6	-3.631
18SN20060805	16036	-149.99	76.004	6	-3.63
18SN20150920	23	-150.006	78.0075	6	-3.63
18SN20150920	52	-144.701	72.6002	6	-3.63
18SN20150920	48	-151.412	71.5727	6	-3.62
18SN20080717	22070	-140	72	6	-3.6178
18SN20080717	22066	-138	73.45	6	-3.5911
18SN20080717	22056	-135.43	76.544	6	-3.5891
18SN20060805	16053	-137.85	73.509	6	-3.584
18SN20080717	22049	-139.97	79.006	6	-3.5723
18SN20150920	17	-139.956	76.9948	6	-3.56
18SN20150920	44	-151.23	71.6588	6	-3.56
18SN20080717	22054	-140.01	76.992	6	-3.5456
18SN20080717	22020	-150	73	6	-3.5288
18SN20080717	22071	-133.96	72.365	6	-3.5199
18SN20070726	19087	-140.06	73.974	6	-3.489
18SN20050729	15005	-122.9	70.552	6	-3.4768
18SN20080717	22060	-140.08	75.951	6	-3.4714
18SN20060805	16034	-150.03	74.986	6	-3.467
18SN20150920	22	-147.068	77.7423	6	-3.46
18SN20070726	19075	-135.34	76.438	6	-3.457
18SN20070726	19015	-140.09	70.965	6	-3.45
18SN20060805	16048	-140.09	75.952	6	-3.441
18SN20080717	22057	-132.53	76.266	6	-3.419
18SN20070726	19064	-143.24	77.307	6	-3.415
18SN20150920	46	-151.921	71.3918	6	-3.4
18SN20080717	22050	-139.91	78.013	6	-3.3973
18SN20070726	19074	-136.51	77.012	6	-3.383
18SN20070726	19043	-156.3	75.666	6	-3.363
18SN20070726	19077	-132.48	76.123	6	-3.348
18SN20080717	22025	-153.28	75.319	6	-3.3468
18SN20070726	19028	-151.23	71.657	6	-3.341
18SN20080717	22048	-140.07	80.029	6	-3.3221
18SN20080717	22047	-140.11	81.02	6	-3.3152
18SN20080717	22045	-140.02	81.99	6	-3.2984
18SN20080717	22007	-140	70.575	6	-3.2766
18SN20080717	22061	-142.45	76.003	6	-3.2677
18SN20070726	19070	-139.94	78.952	6	-3.266
18SN20080717	22027	-157.09	75.743	6	-3.2608
18SN20080717	22026	-155.27	75.513	6	-3.2331
18SN20050729	15024	-149.97	75.989	6	-3.2223
18SN20060805	16046	-138.87	77.179	6	-3.222
18SN20080717	22051	-142.03	77.172	6	-3.2133
18SN20080717	22072	-131.9	71.788	6	-3.2094
18SN20070726	19078	-130.01	75.953	6	-3.203
18SN20070726	19103	-131.84	71.834	6	-3.2
32H120020505	9	-160.13	73.282	6	-3.2
18SN20070726	19052	-153.13	78.343	6	-3.185
18SN20050729	15041	-135.97	72.701	6	-3.1593
18SN20080717	22032	-146.75	77.678	6	-3.154
18SN20060805	16023	-149.94	72.964	6	-3.14
18SN20080717	22019	-151.23	71.658	6	-3.1085
18SN20080717	22036	-153.02	78.329	6	-3.0769
18SN20060805	16021	-150	72.023	6	-3.075
18SN20060805	16043	-146.81	77.706	6	-3.051
18SN20060805	16019	-151.59	71.533	6	-3.035
18SN20080717	22030	-150.04	76.998	6	-3.0225
18SN20080717	22040	-149.89	79.017	6	-3.0007
18SN20080717	22013	-150.23	71.965	6	-2.979
18SN20080717	22039	-154.1	78.293	6	-2.9355
18SN20070726	19022	-140.01	70.003	6	-2.914
18SN20080717	22041	-149.79	80.021	6	-2.9068
18SN20060805	16041	-154.07	78.323	6	-2.897
ZZIC2005SWYD	92	-75.385	85.976	6	-2.86
18SN20080717	22014	-151.66	71.501	6	-2.8504
18SN20050729	15014	-150.84	71.791	6	-2.7696
18SN20080717	22015	-152.04	71.396	6	-2.7406
18SN20060805	16042	-149.99	79.007	6	-2.714
ZZIC2005SWYD	96	-80.516	87.01	6	-2.66
18SN20080717	22042	-149.85	81.028	6	-2.6398
18SN20050729	15013	-151.49	71.624	6	-2.6312
ZZIC2005SWYD	61	-64.4	84.75	6	-2.52
18SN20050729	15028	-150	78.972	6	-2.2104
316N20130914	14	-60.0675	66.7587	6	-2.05
18SN20060805	16017	-152.05	71.398	6	-2.026
316N20091006	30	-62.0581	67.9167	6	-2
316N20130914	15	-60.4822	66.7295	6	-1.94
316N20130914	11	-58.3777	66.9338	6	-1.92
316N20130914	10	-57.6625	66.9743	6	-1.89
316N20130914	13	-59.6207	66.8248	6	-1.89
316N20091006	59	-58.9881	66.2578	6	-1.81
316N20091006	58	-58.6531	66.26	6	-1.79
316N20091006	60	-59.4269	66.2561	6	-1.67
316N20091006	61	-59.8736	66.2608	6	-1.67
32H120020505	39	-157.19	71.404	6	-1.43
316N20091006	57	-58.3167	66.26	6	-1.06
316N20150906	18	-57.3583	67.0127	6	-0.91
316N20130914	7	-56.6745	67.0688	6	-0.83
316N20150906	12	-55.8222	67.1608	6	-0.83
316N20150906	14	-56.3153	67.1067	6	-0.77
316N20091006	53	-56.9908	66.25	6	-0.76
316N20150906	15	-56.675	67.068	6	-0.71
316N20130914	5	-55.822	67.1608	6	-0.7
316N20150906	16	-57.037	67.0333	6	-0.67
58AA20000923	71	26.5	77.07	6	-0.386
58AA20000923	172	25.913	78.58	6	-0.218
58AA20000923	35	34.92	79	6	-0.141
58AA20000923	160	22.803	76.67	6	-0.085
58AA20000923	212	19.082	77.8	6	-0.079
58AA20000923	122	20.365	77.02	6	-0.075
58AA20000923	183	32.765	79.17	6	-0.059
58AA20000923	38	33.862	79.23	6	-0.055
58AA20000923	213	18.72	77.82	6	-0.045
58AA20000923	204	19.555	77.47	6	-0.043
58AA20000923	140	21.595	76.64	6	-0.032
58AA20000923	105	19.073	77.5	6	-0.03
58AA20000923	44	30.968	79.52	6	-0.018
58AA20000923	188	19.148	76.64	6	0.021
58AA20000923	106	18.69	77.51	6	0.026
58AA20000923	19	19.365	76.24	6	0.046
58AA20000923	114	20	77.26	6	0.048
58AA20000923	104	19.555	77.47	6	0.056
58AA20000923	129	18.043	76.89	6	0.059
58AA20000923	31	19.933	76.64	6	0.141
06AQ19930806	11	30.25	81.572	6.134	0.01
18AW19860910	2018	-136.85	70.793	7	-7.7
18AW19860910	2024	-136.13	70.097	7	-7.6
18SN20070726	19096	-144.7	72.688	7	-6.01
18AW19860910	2038	-138.54	69.92	7	-6
18AW19860910	2035	-138.28	69.485	7	-5.8
18SN20080717	22009	-140	69.999	7	-5.4305
18AW19860910	2017	-134.52	70.993	7	-5.1
18AW19860910	2014	-134.2	70.737	7	-5
18DL20040806	33001	-126.28	70.04	7	-4.64
18SN20090917	24012	-140.02	70.233	7	-4.349
18SN20050729	15010	-140	71	7	-4.3184
18SN20050729	15010	-140	71	7	-4.3095
18AW19860910	2021	-136.43	70.358	7	-4.2
18DL20031015	26034	-124.23	70.74	7	-4.16
18DL20031015	26042	-126.5	69.923	7	-4.15
18DL20040625	32057	-124.84	70.321	7	-3.91
ZZIC2005SWYD	95	-75.022	83.984	7	-3.91
18DL20040625	32005	-133.69	70.944	7	-3.88
18DL20040625	32046	-127.08	71.515	7	-3.81
18SN20090917	24046	-140.09	74.003	7	-3.788
18SN20090917	24050	-143.41	74.357	7	-3.783
18SN20070726	19086	-144.98	74.504	7	-3.731
18SN20070726	19083	-139.99	75.984	7	-3.703
18SN20090917	24027	-150	76.999	7	-3.701
18SN20090917	24051	-139.99	73.996	7	-3.691
18SN20070726	19045	-149.96	75.985	7	-3.69
18SN20090917	24044	-139.98	75.985	7	-3.689
18SN20090917	24052	-137.91	73.523	7	-3.671
18SN20070726	19044	-156.29	75.2	7	-3.657
18SN20070726	19085	-140	75.001	7	-3.632
18SN20080717	22063	-143.31	74.299	7	-3.6188
18SN20070726	19050	-149.77	77.943	7	-3.613
18SN20070726	19011	-136.01	72.897	7	-3.597
18SN20070726	19063	-146.82	77.713	7	-3.595
18SN19950803	8023	-137.37	70.608	7	-3.57
18SN20060805	16052	-136.24	74.252	7	-3.565
18SN20080717	22024	-149.9	75.021	7	-3.5407
18SN20070726	19100	-139.99	73	7	-3.538
18SN20060805	16049	-140.03	75.021	7	-3.535
18SN20090917	24030	-153.02	78.344	7	-3.511
18SN20090917	24017	-151.64	71.493	7	-3.504
18SN20070726	19101	-136	72.905	7	-3.499
18SN20090917	24042	-139.88	77.017	7	-3.494
18SN20070726	19068	-140.25	77.041	7	-3.479
18SN20080717	22059	-130.88	76.084	7	-3.4655
18SN20060805	16051	-143.18	74.32	7	-3.463
18SN20090917	24033	-154.23	78.593	7	-3.456
18SN20090917	24013	-139.98	70.572	7	-3.454
18SN20090917	24038	-145.15	77.563	7	-3.444
18SN20050729	15018	-149.75	74.187	7	-3.4298
18SN20090917	24034	-154.27	78.859	7	-3.426
18SN20090917	24037	-150.53	79.001	7	-3.422
18SN20070726	19038	-155.27	75.513	7	-3.42
18SN20090917	24047	-135.46	74.508	7	-3.417
18SN20090917	24039	-140.11	77.828	7	-3.411
18SN20060805	16057	-131.77	71.828	7	-3.382
18SN20070726	19039	-156.06	75.615	7	-3.37
18SN20090917	24016	-152.04	71.396	7	-3.36
18SN20060805	16033	-153.27	75.321	7	-3.357
18SN20050729	15019	-149.94	74.979	7	-3.3541
18SN20090917	24040	-135.47	77.066	7	-3.348
18SN20070726	19069	-140.02	77.998	7	-3.343
18SN20060805	16037	-149.88	76.959	7	-3.34
18SN20070726	19051	-152.62	78.354	7	-3.338
18SN20060805	16011	-122.91	70.549	7	-3.32
18SN20090917	24035	-152.57	80.281	7	-3.317
18SN20050729	15039	-140	73.007	7	-3.2879
18SN20090917	24009	-144.74	72.658	7	-3.286
18SN20080717	22029	-149.98	75.996	7	-3.2845
18SN20060805	16055	-133.73	71.133	7	-3.268
18SN20070726	19054	-153.47	78.351	7	-3.225
18SN20090917	24010	-140.02	71.986	7	-3.215
18SN20090917	24003	-131.78	71.831	7	-3.211
18SN20070726	19080	-128.71	75.837	7	-3.199
18SN20080717	22035	-150.28	77.982	7	-3.1916
18SN20050729	15040	-139.99	71.998	7	-3.1909
18SN20070726	19008	-129.2	73.824	7	-3.187
18SN20050729	15037	-140.37	75.063	7	-3.181
18SN20090917	24004	-134.17	72.149	7	-3.163
18SN20070726	19004	-129.59	73.812	7	-3.161
18SN20070726	19081	-127.79	75.846	7	-3.153
18SN20050729	15015	-150	72.004	7	-3.1346
18SN20050729	15042	-133.23	72.11	7	-3.1316
18SN20080717	22017	-151.78	71.468	7	-3.1214
18SN20050729	15043	-131.74	71.756	7	-3.1009
18SN20090917	24053	-131.78	71.828	7	-3.097
18SN20060805	16022	-150.01	72.465	7	-3.086
18SN20060805	16044	-143.51	77.324	7	-3.077
18SN20070726	19002	-122.89	70.546	7	-3.05
18SN20070726	19060	-150.15	79.915	7	-3.003
18SN20060805	16038	-149.87	77.983	7	-2.999
18SN20070726	19003	-127.35	73.858	7	-2.997
18SN20080717	22038	-153.35	78.34	7	-2.9661
18SN20060805	16040	-153.49	78.343	7	-2.905
18SN20080717	22043	-149.96	82.005	7	-2.889
18SN20060805	16056	-133.26	72.103	7	-2.799
18SN20050729	15036	-139.79	75.998	7	-2.765
18SN20070726	19035	-150.13	74.924	7	-2.757
18SN20050729	15011	-152	71.398	7	-2.5877
18DL20040625	32039	-126.3	70.046	7	-2.17
316N20091006	31	-61.7803	68.0569	7	-2.08
316N20111002	12	-59.0608	66.8493	7	-1.92
18SN20090917	24011	-139.98	69.999	7	-1.879
316N20091006	56	-57.9833	66.2603	7	-1.15
316N20111002	6	-56.3188	67.1063	7	-1.13
58AA20000923	171	25.327	78.52	7	-0.15
58AA20000923	181	23.312	77.16	7	-0.141
58AA20000923	39	33.477	79.31	7	-0.138
58AA20000923	203	19.077	77.5	7	-0.126
58AA20000923	47	29.542	79.59	7	-0.088
58AA20000923	194	19.502	77.26	7	-0.088
58AA20000923	137	20.085	76.83	7	-0.076
58AA20000923	190	19.538	76.64	7	-0.076
58AA20000923	40	33.177	79.37	7	-0.071
58AA20000923	196	19.298	77.2	7	-0.069
58AA20000923	51	27.145	79.69	7	-0.057
58AA20000923	205	20.042	77.45	7	-0.041
58AA20000923	37	34.242	79.16	7	-0.029
58AA20000923	21	19.215	76.34	7	-0.02
58AA20000923	43	31.185	79.46	7	0.017
58AA20000923	49	28.217	79.65	7	0.044
58AA20000923	53	25.612	78.92	7	0.045
58AA20000923	65	26.5	77.99	7	0.052
58AA20000923	27	19.137	76.64	7	0.07
58AA20000923	55	24.542	79.03	7	0.072
58AA20000923	80	19.073	77.5	7	0.09
58AA20000923	42	31.602	79.35	7	0.092
58AA20000923	28	19.338	76.64	7	0.097
58AA20000923	20	19.658	76.34	7	0.128
58AA20000923	30	19.74	76.64	7	0.176
18LU20000902	12003	-111.36	67.888	8	-5.346
18LU20000902	12023	-126.43	70.559	8	-4.87
18LU20000902	12005	-111.21	68.27	8	-4.83
18DL20031015	26022	-126.8	71.398	8	-4.63
18DL20031015	26046	-127.12	71.497	8	-4.23
18DL20031015	26051	-125.8	71.118	8	-4.2
18LU20000902	12022	-126.5	71.298	8	-4.032
18LU20000902	12030	-120.08	69.981	8	-4.001
189119870330	3003	-134.21	70.733	8	-4
06AQ20070728	333	-146.4	87.028	8	-3.955
189119870330	3001	-127.51	70.792	8	-3.9
ZZIC2005SWYD	97	-64.957	84.053	8	-3.82
18LU20000902	12017	-125	70.799	8	-3.791
18SN20090917	24045	-140.06	75.004	8	-3.745
18SN20090917	24021	-150.01	73.998	8	-3.707
18SN20090917	24026	-149.99	75.95	8	-3.705
18LU20000902	12029	-120.67	69.717	8	-3.585
18SN20090917	24018	-150.17	71.953	8	-3.582
18SN20080717	22021	-150	74	8	-3.5644
18SN20090917	24020	-150	73.006	8	-3.547
18LU20000902	12027	-121.67	70.25	8	-3.52
18SN20060805	16031	-156.17	75.456	8	-3.495
18SN20090917	24031	-153.51	78.341	8	-3.476
ZZIC2005SWYD	98	-39.91	89.614	8	-3.39
18LU20000902	12014	-122.94	70.04	8	-3.369
32H120020718	29	-158.22	72.881	8	-3.36
18SN20060805	16024	-150.03	73.994	8	-3.336
32PZ20020819	118	-163.35	75.391	8	-3.33
18SN20060805	16013	-140	70.498	8	-3.264
18LU20000902	12018	-127.75	71.942	8	-3.219
18SN20060805	16015	-140.01	71.248	8	-3.177
18SN20060805	16016	-143.94	71.788	8	-3.148
18SN20070726	19061	-150.03	78.999	8	-3.143
18LU20000902	12012	-118.6	69.438	8	-3.09
18LU20000902	12024	-127.21	70.431	8	-3
18SN20060805	16020	-151	71.724	8	-2.881
18SN20050729	15025	-150.01	76.989	8	-2.8546
18SN20050729	15032	-143.37	77.315	8	-2.7324
ZZIC2005SWYD	62	-64.701	84.107	8	-2.47
ZZIC2005SWYD	99	-88.14	88.434	8	-2.47
32PZ20020819	13	175.6	76.262	8	-2.11
18SN19970801	10018	-81.456	75.837	8	-1.978
316N20111002	11	-58.379	66.9353	8	-1.9
316N20111002	15	-60.4715	66.7315	8	-1.86
316N20150906	30	-59.6233	66.8255	8	-1.85
316N20111002	13	-59.6227	66.8262	8	-1.84
316N20111002	16	-60.8072	66.6917	8	-1.83
18SN19970801	10024	-74.944	78.334	8	-1.805
316N20111002	14	-60.0703	66.7608	8	-1.72
18DL20031015	26004	-133.88	70.923	8	-1.71
316N20111002	9	-57.3638	67.0188	8	-1.25
316N20111002	5	-55.8228	67.1615	8	-1.2
316N20111002	7	-56.679	67.0685	8	-1.07
316N20111002	10	-57.6737	66.978	8	-1.02
06AQ20070728	299	89.043	84.051	8	-0.64
58AA20000923	103	20.042	77.45	8	-0.251
58AA20000923	69	26.5	77.38	8	-0.172
58AA20000923	148	17.583	76.64	8	-0.128
58AA20000923	67	26.502	77.68	8	-0.127
58AA20000923	146	18.583	76.64	8	-0.096
58AA20000923	36	34.623	79.08	8	-0.08
58AA20000923	82	18.725	77.82	8	-0.051
58AA20000923	26	18.957	76.64	8	-0.047
58AA20000923	147	18.083	76.64	8	-0.045
58AA20000923	23	19.012	76.45	8	0.017
58AA20000923	100	20.083	77.63	8	0.044
58AA20000923	29	19.538	76.64	8	0.055
58AA20000923	17	19.675	76.05	8	0.089
58AA20000923	22	19.103	76.39	8	0.156
189119870330	3020	-138.59	69.964	8.5	-5.3
06AQ19930806	38	133.39	78.143	8.509	-1.06
18LU20000902	12006	-111.06	68.396	9	-5.089
18LU20000902	12004	-111.3	68.054	9	-4.836
18DL20031015	26054	-127.72	70.591	9	-3.87
18SN20030806	14036	-138.51	74.247	9	-3.79
18SN20030806	14007	-150	74	9	-3.681
18SN19950803	8027	-137.35	70.376	9	-3.56
18SN20030806	14010	-156.01	74.666	9	-3.51
18SN20060805	16050	-140.13	74.012	9	-3.501
18LU20000902	12019	-126.65	71.942	9	-3.392
32PZ20020819	124	-170.27	75.513	9	-3.33
18LU20000902	12021	-130.59	71.564	9	-3.27
32H120020718	31	-157.4	73.421	9	-3.24
32PZ20020819	73	-153.62	78.055	9	-2.6
18SN20030806	14016	-168.66	76.416	9	-2.486
32PZ20020819	11	-177.1	76.433	9	-2.48
32H120020718	14	-155.02	71.829	9	-2.1
18SN20030806	14002	-150	71.2	9	-2.082
18HU20050904	44	-62.767	67.6257	9	-2.08
316N20130914	21	-62.487	67.7215	9	-1.98
18SN19970801	10019	-81.313	75.982	9	-1.976
316N20150906	46	-60.1455	68.45	9	-1.81
06AQ20070728	371	102.74	84.653	9	-1.61
316N20130914	9	-57.3588	67.0123	9	-1.05
06AQ20070728	285	86.331	82.142	9	-0.79
316N20130914	40	-54.3003	69.1665	9	-0.64
58AA20000923	81	18.917	77.67	9	-0.116
06AQ20070728	291	86.266	82.71	9	-0.053
06AQ20070728	249	33.991	81.996	9	-0.008
06AQ20070728	273	64.753	82.212	9	0.019
58HJ20120807	588	29.917	82.004	9	0.08
58HJ20120807	600	9.9498	80.597	9	0.08
06AQ19870704	269	31.403	81.272	9	0.11
58HJ20120807	583	30.02	81.482	9	0.12
58AA20000923	79	19.255	77.32	9	0.13
77YM19800811	112	9	78.75	9	0.2
58HJ20120807	585	30.21	81.576	9	0.29
58HJ20120807	602	6.5312	80.93	9	0.59
58HJ20120807	581	30.008	81.165	9	0.82
77DN19910726	33	0.75	86.76	9.002	-2.64
77DN19910726	11	52.79	86.07	9.101	-1.53
06AQ19930806	20	40.878	82.392	9.201	0.04
49NZ20020822	13	-154.51	72.068	9.4	-1.723
06AQ19930806	49	126.32	77.098	9.499	-1.33
49NZ20040901	21	-157.5	74.017	9.5	-3.48
49NZ20040901	51	179.5	75.029	9.5	-1.9
77DN19910726	21	131.3	88.24	9.596	-2.37
77DN19910726	18	99.13	88.18	9.596	-1.97
49NZ20020822	63	-151.34	72.501	9.6	-3.568
49NZ20020822	47	-162.56	74.246	9.6	-3.388
49NZ20040901	35	-171.98	74.994	9.6	-3.25
49NZ20040901	56	-178	76.044	9.6	-2.16
77DN19910726	12	55.3	86.6	9.695	-1.89
06AQ19930806	48	126.36	77.13	9.697	-1.46
49NZ20040901	18	-161	73.48	9.7	-3.38
49NZ20020822	36	-157.01	73.489	9.7	-3.231
49NZ20020822	71	-142.01	71.257	9.8	-3.552
49NZ20020822	72	-141.99	71.028	9.8	-3.505
49NZ20020822	138	-166.5	75.999	9.8	-3.352
49NZ20020822	73	-141.85	70.787	9.8	-3.118
77DN19910726	26	163.6	88.02	9.892	-2.55
77DN19910726	14	60.02	87	9.892	-1.88
77DN19910726	10	48.05	85.73	9.893	-1.07
77DN19910726	8	25.96	83.58	9.893	-0.41
49NZ20020822	51	-164.11	73.668	9.9	-3.243
49NZ20020822	31	-159.1	72.803	9.9	-2.957
49NZ20040901	52	179.92	75.368	9.9	-2.61
49NZ20040901	43	-174.01	75.586	9.9	-2.57
49NZ20020822	34	-158.01	73.166	9.9	-2.556
49NZ20020822	12	-154.99	71.882	9.9	-1.809
77DN19910726	31	9.34	88.28	9.991	-2.94
77DN19910726	23	145.52	88	9.991	-2.51
06AQ19930806	22	41.617	82.268	9.992	0.01
06AQ19930806	27	43.553	82.022	9.992	0.06
06AQ19930806	6	30.583	81.205	9.993	0.06
18AW19860910	2024	-136.13	70.097	10	-8.4
18SN19950803	8030	-138.43	69.886	10	-6.54
18AW19860910	2042	-138.41	69.592	10	-5.6
18AW19860910	2035	-138.28	69.485	10	-5.5
18DL20040625	32023	-133.68	70.69	10	-4.64
18AW19860910	2018	-136.85	70.793	10	-4.6
06AQ20070728	349	-164.47	85.064	10	-4.511
18AW19860910	2041	-138.82	70.187	10	-4.5
18DL20031015	26045	-127.66	71.303	10	-4.28
18DL20031015	26050	-125.18	71.306	10	-4.25
18DL20031015	26055	-126.54	69.924	10	-4.25
18AW19860910	2014	-134.2	70.737	10	-4.2
18AW19860910	2038	-138.54	69.92	10	-4.2
18DL20031015	26044	-128.32	71.108	10	-4.17
18DL20031015	26036	-121.03	70.584	10	-4.125
18DL20031015	26047	-126.44	71.698	10	-4.125
18AW19860910	2017	-134.52	70.993	10	-4.1
18DD19870731	4006	-134.6	70.947	10	-4.1
18DL20031015	26049	-124.51	71.485	10	-4.08
18DL20031015	26053	-127.15	70.769	10	-4.07
18SN19950803	8013	-95.944	72.11	10	-4.05
18DL20031015	26046	-127.12	71.497	10	-4.03
06AQ20070728	331	-157.6	87.652	10	-3.915
06AQ20070728	351	-170.76	85.746	10	-3.907
18SN19950803	8018	-145.36	72.986	10	-3.88
18SN19950803	8029	-139.98	70.538	10	-3.87
18DL20040107	28006	-126.3	70.046	10	-3.86
18SN19950803	8028	-137.2	70.336	10	-3.86
18SN19950803	8024	-136.92	70.48	10	-3.82
18DL20040107	28004	-126.3	70.046	10	-3.81
18AW19860910	2021	-136.43	70.358	10	-3.8
18DL20040625	32043	-124.54	71.483	10	-3.78
ZZIC2005SWYD	83	-65.171	83.728	10	-3.75
06AQ20070728	335	-139.36	86.364	10	-3.743
18SN19950803	8022	-141.67	71.873	10	-3.74
ZZIC2005SWYD	85	-89.794	87.125	10	-3.72
18DD19870731	4010	-143.5	72.598	10	-3.7
18DL20040625	32001	-127.12	70.762	10	-3.7
18DL20040625	32048	-128.31	71.113	10	-3.69
18SN20070726	19020	-139.97	70.401	10	-3.677
18DL20040625	32040	-125.85	70.943	10	-3.66
32PZ20020819	114	-160.18	75.156	10	-3.64
ZZIC2005SWYD	84	-63.264	84.094	10	-3.61
18SN20090917	24028	-150.12	78.019	10	-3.577
18SN20030806	14006	-150	73	10	-3.527
18SN20030806	14011	-158.02	74.492	10	-3.459
18SN20030806	14009	-153.5	74.833	10	-3.457
77YM19800811	161	-16.462	82.417	10	-3.44
18SN20030806	14014	-162.06	74.364	10	-3.38
32PZ20020819	121	-166.7	75.221	10	-3.38
32PZ20020819	120	-165.41	75.277	10	-3.34
32PZ20020819	122	-168	75.167	10	-3.34
18DL20040625	32047	-127.71	71.314	10	-3.31
32PZ20020819	123	-169.12	75.339	10	-3.29
18DL20040625	32004	-133.9	71.451	10	-3.27
18DL20040107	28002	-126.3	70.046	10	-3.26
32PZ20020819	1	-167.76	75.595	10	-3.22
06AQ20070728	328	-170.56	87.83	10	-3.201
49NZ20020822	52	-164.56	73.501	10	-3.171
18DL20040625	32022	-133.84	71.21	10	-3.16
49NZ20040901	63	-165.75	74.999	10	-3.12
18SN20030806	14013	-160.48	73.165	10	-3.092
06AQ20070728	352	177.56	86.638	10	-3.007
18SN20030806	14037	-136.91	73.498	10	-3.004
49NZ20020822	140	-168.47	76.245	10	-2.982
06AQ20070728	322	150.12	88.129	10	-2.934
06AQ20070728	345	-145.44	84.693	10	-2.916
32PZ20020819	85	-160.07	76.973	10	-2.69
06AQ20070728	342	-138.42	84.5	10	-2.631
32PZ20020819	92	-163.19	77.328	10	-2.63
32PZ20020819	36	-168.9	79.656	10	-2.59
ZZIC2005SWYD	54	-69.05	85.083	10	-2.59
32PZ20020819	86	-160.61	77.08	10	-2.55
77YM19800811	157	-10.967	80.083	10	-2.52
316N20061001	24	-60.9727	66.6743	10	-2.38
06AQ20070728	358	151.98	86.504	10	-2.227
06AQ20070728	312	120.18	88.118	10	-2.226
32PZ20020819	71	-154.13	78.16	10	-2.19
316N20071003	22	-62.6142	67.6755	10	-2.16
316N20150906	34	-62.769	67.6255	10	-2.15
06AQ20070728	363	135.02	86.459	10	-2.141
18SN20030806	14003	-150	71.263	10	-2.13
316N20150906	36	-62.4867	67.7228	10	-2.12
18SN20030806	14004	-150	71.499	10	-2.091
32H120030721	204	-67.001	73.682	10	-2.05
06AQ20070728	377	115.48	83.415	10	-2.045
316N20130914	14	-60.0675	66.7587	10	-2
316N20150906	40	-61.7717	68.0472	10	-2
32H120030721	204	-67.001	73.682	10	-1.98
316N20130914	12	-59.057	66.852	10	-1.96
316N20150906	44	-61.212	68.3168	10	-1.96
18HU20050904	39	-60.9723	66.6743	10	-1.95
316N20130914	18	-60.971	66.6695	10	-1.95
316N20150906	26	-60.8123	66.6953	10	-1.95
18HU20050904	48	-62.3612	67.7682	10	-1.94
316N20130914	24	-61.7708	68.0482	10	-1.94
06AQ20070728	307	94.287	86.303	10	-1.926
316N20130914	16	-60.8118	66.6918	10	-1.92
316N20150906	27	-60.4805	66.7323	10	-1.91
316N20130914	26	-61.2013	68.308	10	-1.86
316N20150906	45	-60.5022	68.396	10	-1.86
316N20130914	13	-59.6207	66.8248	10	-1.84
06AQ20070728	373	108.94	84.199	10	-1.811
316N20111002	30	-60.499	68.3948	10	-1.8
49NZ20020822	11	-155.49	71.688	10	-1.779
18HU20050904	52	-61.4813	68.1788	10	-1.76
316N20150906	19	-57.6613	66.9748	10	-1.7
06AQ20070728	383	122.22	80.659	10	-1.694
06AQ20070728	402	123.19	77.215	10	-1.679
06AQ20070728	400	123.4	77.388	10	-1.578
06AQ20070728	394	123.93	77.863	10	-1.567
18HU20050904	45	-62.6083	67.6772	10	-1.54
316N20061001	78	-61.4843	68.1775	10	-1.5
316N20111002	29	-61.2005	68.3082	10	-1.43
316N20130914	30	-59.6905	68.4982	10	-1.36
316N20111002	33	-59.6902	68.497	10	-1.26
06AQ20070728	389	124.52	78.355	10	-1.234
06AQ20070728	387	124.61	78.638	10	-1.227
316N20111002	39	-56.9932	68.8322	10	-1.2
06AQ20070728	397	123.6	77.634	10	-1.146
316N20130914	32	-59.3432	68.539	10	-1.11
06AQ20070728	401	123.35	77.299	10	-1.108
06AQ20070728	386	124.55	78.939	10	-1.084
06AQ20070728	280	86.249	81.415	10	-1.071
06AQ20070728	403	123.12	77.15	10	-1.044
06AQ20070728	279	86.179	81.23	10	-0.978
06AQ20070728	283	86.112	81.869	10	-0.859
06AQ20070728	284	86.201	82.021	10	-0.822
316N20040922	3	-57.6662	66.9742	10	-0.8
316N20130914	38	-55.5917	69.0048	10	-0.79
06AQ20070728	282	86.219	81.715	10	-0.763
18HU20050904	9	-55.8302	67.1615	10	-0.76
316N20150906	14	-56.3153	67.1067	10	-0.76
316N20040922	7	-56.3023	67.1067	10	-0.74
06AQ20070728	281	86.257	81.576	10	-0.725
18HU20050904	12	-56.315	67.115	10	-0.68
316N20040922	5	-57.033	67.0393	10	-0.68
316N20150906	60	-54.3017	69.1665	10	-0.68
316N20130914	36	-56.9988	68.8318	10	-0.66
316N20150906	55	-56.9953	68.831	10	-0.65
316N20150906	62	-54.8935	68.5017	10	-0.65
316N20040922	6	-56.7033	67.09	10	-0.62
18HU20050904	13	-56.6815	67.0778	10	-0.57
06AQ20070728	278	84.054	81.531	10	-0.562
18HU20050904	15	-57.0352	67.0455	10	-0.55
06AQ20070728	277	83.831	82.392	10	-0.443
06AQ20070728	287	86.194	82.334	10	-0.359
77YM19800811	171	0.867	81.4	10	-0.24
06AQ20070728	295	86.284	83.272	10	-0.218
06AQ20070728	297	87.237	83.588	10	-0.215
06AQ20070728	260	36.139	84.489	10	-0.192
06AQ20070728	288	86.334	82.419	10	-0.191
06AQ20070728	267	61.283	82.966	10	-0.143
06AQ20070728	290	86.423	82.58	10	-0.139
06AQ20070728	263	60.998	84.172	10	-0.016
06AQ20070728	275	66.959	82.183	10	-0.011
06AQ20070728	252	34.037	82.251	10	-0.008
06AQ20070728	274	67.112	82.521	10	0.012
58HJ20120807	582	29.982	81.415	10	0.04
06AQ20070728	289	86.263	82.501	10	0.043
06AQ20070728	256	33.877	82.858	10	0.054
58HJ20120807	580	29.997	80.919	10	0.08
06AQ20070728	238	33.997	80.494	10	0.09
06AQ20070728	293	86.268	82.968	10	0.1
58HJ20120807	587	30.268	81.756	10	0.11
06AQ19870704	340	31.982	82.988	10	0.12
58HJ20120807	601	8.543	80.75	10	0.14
06AQ20070728	240	34.004	81.499	10	0.165
77YM19800811	197	29.433	80.417	10	0.18
77YM19800811	204	46.25	82.017	10	0.18
58HJ20120807	584	30.102	81.536	10	0.19
06AQ19870704	310	32.037	82.09	10	0.21
77YM19800811	203	46.883	81.667	10	0.22
58HJ20120807	586	30.069	81.656	10	0.24
06AQ19870704	287	30.998	81.683	10	0.27
58HJ20120807	598	11.546	80.32	10	0.36
58HJ20120807	599	11.095	80.432	10	0.36
77YM19800811	216	42.35	80.55	10	0.44
58HJ20120807	603	5.4405	81.058	10	0.44
49NZ20020822	75	-141.72	70.563	10.1	-3.581
49NZ20040901	36	-172	74.67	10.1	-3.21
49NZ20040901	112	-151.98	74.007	10.1	-3.04
06AQ19930806	19	40.207	82.755	10.19	-0.03
49NZ20040901	98	-161.66	75.917	10.2	-3.43
49NZ20040901	83	-165.6	76.184	10.2	-3.07
49NZ20040901	19	-160	73.633	10.2	-2.91
49NZ20040901	62	-166.91	75.166	10.2	-2.83
49NZ20040901	41	-174	75.25	10.2	-2.79
49NZ20040901	80	-166.99	75.997	10.2	-2.64
49NZ20040901	146	-159.67	73.067	10.2	-2.12
49NZ20020822	9	-157.98	71.335	10.2	-1.184
77DN19910726	48	0.44	84.04	10.289	-2.22
77DN19910726	61	19.9	81.14	10.289	0.03
49NZ20040901	124	-162	75.007	10.3	-3.15
49NZ20040901	79	-169.99	74.331	10.3	-2.68
06AQ19930806	36	133.26	78.307	10.389	-1.13
49NZ20040901	90	-168.51	76.25	10.4	-2.73
49NZ20040901	160	-153.83	71.86	10.4	-1.97
49NZ20020822	70	-142.08	71.848	10.5	-3.415
49NZ20020822	139	-166.97	75.726	10.5	-3.306
49NZ20040901	78	-168.83	74.002	10.5	-2.93
49NZ20040901	110	-154	74.501	10.6	-3.3
49NZ20040901	154	-155.67	72	10.6	-2.54
49NZ20040901	116	-154	73.501	10.7	-3.15
49NZ20040901	166	-157.31	72.701	10.7	-2.36
18SN20150920	67	-140.025	70.231	11	-3.73
18DL20040625	32039	-126.3	70.046	11	-3.66
18SN20030806	14033	-140.01	75.001	11	-3.62
18SN20030806	14038	-136.17	72.666	11	-3.587
32H120020718	31	-157.4	73.421	11	-3.52
18SN20090917	24008	-139.95	72.491	11	-3.438
18SN19950803	8021	-139.34	71.206	11	-3.38
18SN20150920	46	-151.921	71.3918	11	-3.38
32H120020718	17	-153.3	72.507	11	-3.32
32H120020718	27	-158.44	72.733	11	-3.32
18SN20030806	14035	-139.83	76.063	11	-3.285
18SN20090917	24014	-140	70.999	11	-3.285
32H120020505	10	-159.84	73.449	11	-3.28
32H120020505	18	-158.62	72.746	11	-3.24
18SN20030806	14034	-145.06	75.063	11	-3.23
32H120020505	33	-154.4	72.187	11	-3.06
32PZ20020819	7	-169.28	76.227	11	-2.84
32PZ20020819	81	-157.4	77.096	11	-2.79
32PZ20020819	79	-155.95	77.254	11	-2.75
32PZ20020819	94	-166.34	77.263	11	-2.54
ZZIC2005SWYD	53	-65.233	84.45	11	-2.5
32H120020505	37	-155.76	71.65	11	-2.48
18SN20030806	14018	-165.24	77.865	11	-2.469
316N20071003	21	-62.7675	67.6238	11	-2.38
18SN19970801	10020	-73.279	78.4	11	-2.366
32PZ20020819	63	-157.04	78.882	11	-2.22
316N20130914	20	-62.7682	67.6248	11	-2.12
316N20150906	25	-60.9735	66.6745	11	-2.1
316N20061001	27	-60.0705	66.7605	11	-1.98
18SN19970801	10017	-81.246	76.054	11	-1.974
316N20150906	41	-61.4878	68.1793	11	-1.96
316N20130914	11	-58.3777	66.9338	11	-1.94
18HU20050904	41	-60.8097	66.6935	11	-1.92
316N20130914	15	-60.4822	66.7295	11	-1.92
18SN20060805	16018	-152.21	71.33	11	-1.911
316N20130914	10	-57.6625	66.9743	11	-1.91
316N20130914	25	-61.4888	68.1772	11	-1.91
18SN19970801	10016	-81.379	75.914	11	-1.906
316N20150906	29	-60.0367	66.7598	11	-1.89
316N20111002	13	-59.6227	66.8262	11	-1.88
316N20150906	21	-59.0547	66.8525	11	-1.88
32H120030721	304	-74.436	78.333	11	-1.87
316N20071003	24	-62.3652	67.7647	11	-1.85
316N20130914	22	-62.2228	67.843	11	-1.85
316N20111002	11	-58.379	66.9353	11	-1.83
18HU20050904	25	-60.0695	66.7582	11	-1.82
316N20061001	29	-59.0642	66.854	11	-1.8
316N20111002	28	-61.4847	68.178	11	-1.78
316N20111002	21	-62.7683	67.6242	11	-1.76
316N20111002	27	-61.771	68.048	11	-1.73
316N20150906	48	-59.692	68.4967	11	-1.71
316N20111002	17	-60.9728	66.6742	11	-1.7
316N20150906	20	-58.3773	66.9335	11	-1.66
316N20150906	50	-59.3478	68.5387	11	-1.51
06AQ20070728	391	124.24	78.13	11	-1.476
316N20130914	27	-60.4998	68.3945	11	-1.41
32H120020505	39	-157.19	71.404	11	-1.37
316N20130914	28	-60.1537	68.438	11	-1.33
316N20111002	41	-55.5908	69.0058	11	-1.17
18HU20050904	75	-57.6885	66.9817	11	-1.13
18HU20050904	22	-59.0553	66.8517	11	-1.12
316N20150906	53	-58.4	68.657	11	-1.12
316N20130914	34	-58.4002	68.6562	11	-1.02
316N20150906	18	-57.3583	67.0127	11	-0.83
316N20150906	12	-55.8222	67.1608	11	-0.82
316N20130914	7	-56.6745	67.0688	11	-0.8
316N20150906	16	-57.037	67.0333	11	-0.74
316N20130914	5	-55.822	67.1608	11	-0.73
316N20150906	58	-55.5952	69.0062	11	-0.71
316N20040922	8	-55.8228	67.162	11	-0.7
316N20150906	15	-56.675	67.068	11	-0.7
316N20150906	63	-54.3727	68.5023	11	-0.66
316N20130914	6	-56.3162	67.1082	11	-0.61
58AA20000923	170	24.737	78.45	11	-0.082
58AA20000923	172	25.913	78.58	11	-0.073
77YM19800811	209	39.167	81.9	11	0.04
77YM19800811	176	4	79.333	11	0.08
06AQ20070728	264	60.429	83.642	11	0.109
77YM19800811	102	22.65	81.583	11	0.13
77YM19800811	215	41.183	80.833	11	0.16
77YM19800811	212	40.333	81.4	11	0.21
77YM19800811	202	45.183	81.1	11	0.24
77YM19800811	206	45.083	82.383	11	0.3
77YM19800811	210	39.433	81.75	11	0.43
06AQ19930806	39	133.52	78.1	11.082	-1.29
06AQ19930806	33	130.57	79.647	11.477	-1.36
06AQ19930806	32	132.34	78.715	11.675	-1.11
18DL20031015	26034	-124.23	70.74	12	-3.98
32PZ20020819	27	-179.89	79.962	12	-3.95
18DL20031015	26042	-126.5	69.923	12	-3.84
32PZ20020819	112	-158.98	74.892	12	-3.72
32H120020718	32	-159.09	73.707	12	-3.53
18SN19950803	8026	-135.85	70.5	12	-3.47
32H120020718	29	-158.22	72.881	12	-3.32
32H120020505	9	-160.13	73.282	12	-3.25
32PZ20020819	119	-164.26	75.333	12	-3.25
32H120030721	602	-61.388	82.111	12	-3.01
32PZ20020819	6	-169.16	76.136	12	-3
32H120020718	20	-152.29	71.696	12	-2.91
32PZ20020819	126	-171.16	75.88	12	-2.79
32PZ20020819	74	-153.01	77.796	12	-2.67
32PZ20020819	88	-161.84	77.227	12	-2.44
18SN20030806	14020	-150.1	80.019	12	-2.41
316N20111002	16	-60.8072	66.6917	12	-2.29
18SN19970801	10021	-73.661	78.333	12	-2.257
32PZ20020819	18	177.37	77.985	12	-2.21
18SN19970801	10023	-74.506	78.332	12	-2.203
316N20061001	25	-60.81	66.6933	12	-2.12
32PZ20020819	54	-160.86	79.272	12	-2.07
18SN19970801	10019	-81.313	75.982	12	-2.069
316N20061001	71	-62.7667	67.6237	12	-2.02
316N20061001	74	-62.3622	67.7677	12	-1.96
316N20061001	72	-62.608	67.6763	12	-1.94
316N20040922	18	-60.8063	66.6902	12	-1.93
316N20111002	12	-59.0608	66.8493	12	-1.9
18SN20060805	16017	-152.05	71.398	12	-1.892
316N20150906	30	-59.6233	66.8255	12	-1.89
316N20111002	15	-60.4715	66.7315	12	-1.88
316N20061001	31	-57.6723	66.9792	12	-1.87
316N20080901	29	-61.4987	68.1655	12	-1.82
316N20071003	26	-62.0573	67.9183	12	-1.78
32H120030721	1	-67.025	72.753	12	-1.75
316N20111002	14	-60.0703	66.7608	12	-1.62
316N20071003	10	-55.8195	67.161	12	-1.46
316N20111002	35	-59.3407	68.5392	12	-1.37
316N20111002	9	-57.3638	67.0188	12	-1.33
316N20111002	5	-55.8228	67.1615	12	-1.25
316N20080901	11	-57.0397	67.0358	12	-1.06
316N20061001	34	-56.6743	67.066	12	-0.89
316N20061001	35	-56.308	67.1063	12	-0.84
316N20130914	8	-57.0388	67.0392	12	-0.65
77YM19800811	220	24.967	74	12	0.49
06AQ19930806	70	112.69	78.755	12.566	-0.99
18DL20031015	26044	-128.32	71.108	13	-4.17
18SN20070726	19018	-140.05	70.582	13	-4.093
32PZ20020819	28	-179	79.996	13	-4.04
32PZ20020819	26	178.72	79.893	13	-4.01
32PZ20020819	29	-178.66	80.008	13	-4.01
32PZ20020819	25	177.71	79.75	13	-3.96
32PZ20020819	24	177.15	79.783	13	-3.92
18DL20040625	32046	-127.08	71.515	13	-3.85
32PZ20020819	30	-176.94	80.016	13	-3.84
18SN20090917	24001	-127.76	71.032	13	-3.778
18DL20031015	26051	-125.8	71.118	13	-3.75
18DL20031015	26004	-133.88	70.923	13	-3.72
32PZ20020819	107	-157.12	74.504	13	-3.7
18DL20040625	32041	-125.84	71.123	13	-3.64
32PZ20020819	111	-157.98	74.666	13	-3.61
18DL20040625	32057	-124.84	70.321	13	-3.57
32PZ20020819	31	-175.13	80.06	13	-3.32
32H120020718	29	-158.22	72.881	13	-3.25
32PZ20020819	23	175.8	79.795	13	-3.18
32PZ20020819	22	175.11	79.847	13	-3.06
32PZ20020819	83	-158.61	76.954	13	-3.01
32PZ20020819	20	175	78.956	13	-2.99
32PZ20020819	32	-173.35	80.11	13	-2.97
32PZ20020819	95	-167.9	77.209	13	-2.72
32PZ20020819	76	-152.35	77.675	13	-2.71
32PZ20020819	98	-169.34	77.136	13	-2.67
32PZ20020819	125	-171.29	75.698	13	-2.64
32PZ20020819	97	-168.93	77.142	13	-2.59
316N20080901	21	-62.7653	67.6237	13	-2.5
32PZ20020819	89	-162.16	77.232	13	-2.46
32PZ20020819	17	177.92	77.582	13	-2.24
316N20071003	5	-60.9727	66.6757	13	-2.24
316N20080901	24	-62.3605	67.7695	13	-2.14
316N20080901	22	-62.6107	67.6762	13	-2.12
32PZ20020819	19	176.22	78.691	13	-2.07
316N20080901	26	-62.0552	67.9183	13	-2.05
316N20080901	13	-59.6213	66.826	13	-2.04
316N20040922	16	-60.1405	66.757	13	-1.95
316N20040922	20	-60.9817	66.6732	13	-1.89
316N20071003	9	-56.3107	67.1042	13	-1.58
316N20071003	8	-56.687	67.072	13	-1.15
316N20071003	7	-57.0492	67.0342	13	-1.03
316N20061001	37	-55.813	67.1625	13	-0.98
316N20061001	33	-57.0375	67.0382	13	-0.84
316N20071003	2	-60.0702	66.7602	13	0
77YM19800811	114	7.994	78.742	13	0.36
06AQ19930806	53	122.88	79.237	13.159	-0.41
06AQ19930806	60	118.45	77.547	13.259	-0.96
06AQ19930806	35	133.05	78.378	13.555	-1.1
06AQ19930806	46	126.09	77.47	13.853	-1.38
18DL20031015	26050	-125.18	71.306	14	-4.19
18DL20031015	26036	-121.03	70.584	14	-4.12
32PZ20020819	21	174.26	79.196	14	-3.54
18SN20080717	22057	-132.53	76.266	14	-3.5328
32PZ20020819	117	-162.29	75.42	14	-3.46
18DL20040625	32005	-133.69	70.944	14	-3.38
18SN20090917	24005	-136.01	72.868	14	-3.256
32H120020505	14	-158.15	73.099	14	-3.25
32PZ20020819	34	-170.1	80.198	14	-3.11
32PZ20020819	4	-168.81	76.037	14	-3.04
32PZ20020819	33	-172.84	80.228	14	-2.95
32PZ20020819	12	-177.41	76.432	14	-2.42
32PZ20020819	47	-165.11	78.381	14	-2.33
32PZ20020819	14	175.86	76.524	14	-2.24
32PZ20020819	45	-166.91	78.382	14	-2.22
316N20080901	16	-60.8105	66.6925	14	-2.16
18SN19970801	10008	-60.359	66.614	14	-2.153
316N20080901	17	-60.9735	66.6745	14	-2.11
316N20080901	12	-59.063	66.853	14	-2.07
316N20080901	15	-60.4825	66.7282	14	-2.07
316N20080901	12	-59.063	66.853	14	-2.05
32PZ20020819	70	-154.78	78.328	14	-2.03
18SN19970801	10015	-64.667	72	14	-2.016
316N20080901	27	-61.771	68.0472	14	-1.9
32H120030721	1	-67.025	72.753	14	-1.83
316N20080901	6	-56.3063	67.1052	14	-1.28
316N20071003	18	-59.0585	66.8517	14	-1.27
316N20080901	7	-58.3827	66.9363	14	-1.26
316N20080901	10	-56.6752	67.0692	14	-1.23
32H120030721	213	-67.005	75.701	14	-1.21
316N20071003	30	-60.4972	68.3948	14	-1.18
32H120030721	212	-67.001	75.533	14	-1.16
316N20071003	16	-57.6735	66.98	14	-1.03
316N20080901	5	-55.821	67.1608	14	-0.95
316N20080901	8	-57.6753	66.9792	14	-0.95
316N20111002	8	-57.0372	67.0355	14	-0.7
06AQ19930806	28	102.32	78.035	14.05	-3.07
06AQ19930806	58	118.58	78.002	14.248	-0.58
77DN19910726	26	163.6	88.02	14.443	-2.54
06AQ19930806	62	118.18	77.41	14.446	-1.15
06AQ19930806	24	42.038	82.16	14.543	-0.02
06AQ19930806	30	101.76	77.882	14.545	-3.21
06AQ19930806	68	110.82	78.468	14.644	-1.3
06AQ19930806	18	39.317	82.563	14.741	-0.03
06AQ19930806	69	112.53	78.692	14.94	-1.13
189119870330	3008	-134.22	70.667	15	-4.3
18DL20031015	26053	-127.15	70.769	15	-4.09
18DL20031015	26052	-126.47	70.945	15	-4.07
18DL20031015	26055	-126.54	69.924	15	-4.06
18DL20031015	26047	-126.44	71.698	15	-4.04
18DL20031015	26049	-124.51	71.485	15	-3.93
18DL20031015	26046	-127.12	71.497	15	-3.86
18DL20040625	32023	-133.68	70.69	15	-3.86
18DD19870731	4006	-134.6	70.947	15	-3.8
18DL20040625	32045	-126.48	71.702	15	-3.77
18DL20040107	28006	-126.3	70.046	15	-3.75
32PZ20020819	109	-157.66	74.624	15	-3.75
18DL20031015	26054	-127.72	70.591	15	-3.7
18DL20040625	32043	-124.54	71.483	15	-3.63
18DL20040625	32048	-128.31	71.113	15	-3.62
189119870330	3009	-134.46	70.962	15	-3.6
18DL20040625	32040	-125.85	70.943	15	-3.58
18SN20070726	19032	-150.07	72.51	15	-3.58
18SN19950803	8023	-137.37	70.608	15	-3.51
18DL20040107	28004	-126.3	70.046	15	-3.47
77YM19800811	161	-16.462	82.417	15	-3.43
18DL20040625	32042	-125.19	71.301	15	-3.39
77YM19800811	168	-3.51999	81.717	15	-3.33
32H120020718	31	-157.4	73.421	15	-3.32
18DL20040625	32004	-133.9	71.451	15	-3.24
18DL20040625	32022	-133.84	71.21	15	-3.19
77YM19800811	159	-15.15	80.283	15	-2.81
32PZ20020819	75	-152.63	77.71	15	-2.77
18DL20031015	26003	-133.7	70.688	15	-2.69
77YM19800811	157	-10.967	80.083	15	-2.6
32PZ20020819	46	-166.46	78.115	15	-2.53
32PZ20020819	91	-163.06	77.283	15	-2.51
32PZ20020819	48	-164.27	78.662	15	-2.45
32PZ20020819	15	176.24	76.652	15	-2.1
316N20080901	14	-60.0715	66.76	15	-2.1
316N20080901	14	-60.0715	66.76	15	-2.1
32PZ20020819	59	-158.24	79.251	15	-2.04
32PZ20020819	66	-155.81	78.498	15	-2.04
316N20100804	28	-61.486	68.179	15	-2.04
32PZ20020819	67	-155.71	78.457	15	-1.99
32H120030721	209	-67.001	74.971	15	-1.15
06AQ20070728	292	86.284	82.814	15	-0.009
77YM19800811	203	46.883	81.667	15	0.25
77YM19800811	204	46.25	82.017	15	0.25
77YM19800811	196	29.517	80.733	15	0.36
77YM19800811	197	29.433	80.417	15	0.4
77DN19910726	14	60.02	87	15.036	-1.98
77DN19910726	11	52.79	86.07	15.037	-1.61
77DN19910726	9	42.3	85.07	15.037	-0.23
06AQ19930806	40	133.55	78.073	15.139	-1.04
77DN19910726	17	85.06	88.01	15.432	-1.89
77DN19910726	55	13.61	82.6	15.532	-1.13
ZZIC2005SWYD	81	-67.142	84.941	16	-3.92
18DL20031015	26022	-126.8	71.398	16	-3.76
18DL20031015	26004	-133.88	70.923	16	-3.62
77YM19800811	162	-8.85001	81.717	16	-3.58
32H120020505	11	-159.57	73.608	16	-3.56
18SN20070726	19099	-145.37	73.011	16	-3.505
18SN20150920	4	-134.002	72.3497	16	-3.49
77YM19800811	164	-9.10001	81.683	16	-3.48
18SN20080717	22050	-139.91	78.013	16	-3.4714
18SN20150920	2	-122.919	70.541	16	-3.39
18SN20050729	15039	-140	73.007	16	-3.3848
ZZIC2005SWYD	86	-87.869	88.909	16	-3.37
18SN20150920	3	-131.876	71.7792	16	-3.34
32H120020718	43	-165.4	73.63	16	-3.3
18SN20090917	24014	-140	70.999	16	-3.211
32H120030721	506	-64.296	81.167	16	-3.02
18SN20080717	22039	-154.1	78.293	16	-2.977
32H120020505	32	-154.47	72.073	16	-2.89
32H120030721	505	-64.498	81.191	16	-2.89
32PZ20020819	39	-167.51	78.914	16	-2.84
32PZ20020819	42	-167.15	78.654	16	-2.62
32H120020718	20	-152.29	71.696	16	-2.5
18SN20080717	22015	-152.04	71.396	16	-2.4361
32PZ20020819	52	-161.64	79.105	16	-2.36
32PZ20020819	51	-161.9	79.057	16	-2.16
18SN19970801	10022	-74.075	78.334	16	-2.149
32PZ20020819	68	-155.63	78.417	16	-2.01
32PZ20020819	65	-156	78.569	16	-2
32H120030721	202	-66.996	73.054	16	-1.88
32H120030721	302	-73.376	78.339	16	-1.88
32H120030721	208	-67.001	74.786	16	-1.86
316N20071003	28	-61.4885	68.1783	16	-1.86
316N20100804	31	-60.153	68.439	16	-1.84
32H120030721	102	-68.006	72.753	16	-1.71
32H120030721	301	-72.914	78.332	16	-1.52
32H120020505	39	-157.19	71.404	16	-1.37
32H120030721	210	-66.996	75.135	16	-1.23
32H120030721	209	-67.001	74.971	16	-1.13
77YM19800811	215	41.183	80.833	16	0.08
77YM19800811	109	14.95	81	16	0.26
77YM19800811	202	45.183	81.1	16	0.27
77YM19800811	212	40.333	81.4	16	0.3
77DN19910726	43	-14.86	85.05	16.125	-2.87
77DN19910726	58	16.46	81.86	16.225	-0.63
06AQ19930806	11	30.25	81.572	16.522	-0.02
18LU20000902	12005	-111.21	68.27	17	-4.73
18SN20090917	24027	-150	76.999	17	-3.677
18SN20060805	16051	-143.18	74.32	17	-3.509
18SN20090917	24039	-140.11	77.828	17	-3.379
77YM19800811	166	-7.117	82.017	17	-3.32
18SN20060805	16031	-156.17	75.456	17	-3.313
18SN20090917	24040	-135.47	77.066	17	-3.301
32H120020505	16	-158.28	72.875	17	-3.17
18LU20000902	12027	-121.67	70.25	17	-3.161
18DL20040107	28002	-126.3	70.046	17	-3.16
32PZ20020819	3	-168.67	76.013	17	-3.1
18SN20090917	24053	-131.78	71.828	17	-3.081
32H120030721	605	-60.794	82.051	17	-3.01
32H120030721	502	-65.02	81.263	17	-2.98
32H120030721	604	-61.012	82.069	17	-2.98
32H120030721	701	-61.837	81.126	17	-2.93
32H120030721	801	-63.249	81.621	17	-2.91
32H120030721	602	-61.388	82.111	17	-2.88
32H120030721	603	-61.184	82.091	17	-2.88
32H120030721	607	-60.38	82.008	17	-2.86
32H120030721	503	-64.838	81.24	17	-2.83
32H120030721	606	-60.592	82.025	17	-2.82
32PZ20020819	77	-154.61	77.392	17	-2.79
18LU20000902	12018	-127.75	71.942	17	-2.744
32H120030721	507	-64.116	81.144	17	-2.7
32H120030721	501	-65.146	81.284	17	-2.68
32H120030721	405	-68.585	80.518	17	-2.61
32H120030721	601	-61.611	82.126	17	-2.6
32PZ20020819	44	-166.84	78.618	17	-2.54
32H120030721	403	-68.775	80.543	17	-2.48
32H120030721	413	-67.567	80.394	17	-2.4
32H120030721	401	-68.926	80.559	17	-2.35
32H120030721	411	-67.816	80.42	17	-2.35
32PZ20020819	40	-167.24	78.731	17	-2.26
32H120030721	409	-68.039	80.462	17	-2.16
32H120030721	105	-70.826	72.586	17	-2.12
32PZ20020819	49	-162.03	78.943	17	-2.12
32H120030721	407	-68.322	80.487	17	-2.1
32PZ20020819	56	-159.18	79.528	17	-1.94
32H120030721	207	-66.99	74.552	17	-1.76
32H120030721	305	-74.898	78.332	17	-1.75
32H120030721	303	-73.889	78.332	17	-1.62
77YM19800811	172	3.2	81.117	17	-0.13
77YM19800811	220	24.967	74	17	0.49
77DN19910726	46	-6.19	84.58	17.213	-2.62
06AQ19930806	38	133.39	78.143	17.414	-1.09
18LU20000902	12004	-111.3	68.054	18	-4.79
18LU20000902	12004	-111.3	68.054	18	-4.604
18LU20000902	12006	-111.06	68.396	18	-4.472
18LU20000902	12003	-111.36	67.888	18	-4.25
18SN20090917	24045	-140.06	75.004	18	-3.722
18SN20080717	22071	-133.96	72.365	18	-3.689
18SN20060805	16036	-149.99	76.004	18	-3.64
18SN20080717	22060	-140.08	75.951	18	-3.4457
18LU20000902	12017	-125	70.799	18	-3.439
32PZ20020819	118	-163.35	75.391	18	-3.27
18LU20000902	12015	-122.92	70.545	18	-3.212
18LU20000902	12030	-120.08	69.981	18	-3.208
18LU20000902	12023	-126.43	70.559	18	-3.158
18LU20000902	12014	-122.94	70.04	18	-3.089
18LU20000902	12019	-126.65	71.942	18	-3.007
18LU20000902	12022	-126.5	71.298	18	-2.938
32PZ20020819	38	-167.92	79.101	18	-2.93
18LU20000902	12029	-120.67	69.717	18	-2.921
18LU20000902	12011	-118.4	69.583	18	-2.913
18LU20000902	12024	-127.21	70.431	18	-2.564
18SN20080717	22015	-152.04	71.396	18	-2.2739
18SN19970801	10013	-59.358	66.834	18	-2.176
32PZ20020819	60	-157.86	79.204	18	-2.05
316N20071003	22	-62.6142	67.6755	18	-2.05
32H120030721	205	-67.061	73.969	18	-2.02
18SN19970801	10019	-81.313	75.982	18	-1.871
18SN19970801	10016	-81.379	75.914	18	-1.783
18SN20030806	14002	-150	71.2	18	-1.777
32H120030721	203	-66.996	73.382	18	-1.67
32H120020718	14	-155.02	71.829	18	-1.66
77YM19800811	201	41.117	80.8	18	0.3
18SN20070726	19085	-140	75.001	19	-3.837
ZZIC2005SWYD	82	-67.509	85.943	19	-3.79
18SN19950803	8018	-145.36	72.986	19	-3.71
18SN19950803	8028	-137.2	70.336	19	-3.65
18SN20070726	19075	-135.34	76.438	19	-3.525
18SN20070726	19097	-143.83	72.646	19	-3.514
18SN20060805	16049	-140.03	75.021	19	-3.501
18SN20080717	22049	-139.97	79.006	19	-3.4507
18SN20060805	16034	-150.03	74.986	19	-3.405
32PZ20020819	114	-160.18	75.156	19	-3.35
18SN20080717	22061	-142.45	76.003	19	-3.3449
18LU20000902	12021	-130.59	71.564	19	-3.295
18SN20060805	16045	-140.09	77.919	19	-3.271
ZZIC2005SWYD	86	-87.869	88.909	19	-3.18
ZZIC2005SWYD	75	-102.99	89.161	19	-3.13
32PZ20020819	2	-168.53	75.948	19	-3.07
18SN20080717	22044	-149.99	83.029	19	-3.0225
18LU20000902	12012	-118.6	69.438	19	-2.957
18SN20080717	22009	-140	69.999	19	-2.2017
32H120030721	109	-73.17	72.412	19	-1.93
32H120030721	111	-74.441	72.336	19	-1.93
18HU20050904	39	-60.9723	66.6743	19	-1.93
18SN20030806	14003	-150	71.263	19	-1.8
316N20100804	110	-51.2517	69.184	19	-1.46
316N20071003	35	-59.3438	68.5383	19	-1.01
58HJ20120807	580	29.997	80.919	19	-0.13
58AA20000923	56	24.008	79.09	19	0.147
58HJ20120807	582	29.982	81.415	19	0.22
58HJ20120807	598	11.546	80.32	19	0.3
58HJ20120807	581	30.008	81.165	19	0.41
77DN19910726	46	-6.19	84.58	19.785	-2.64
77DN19910726	8	25.96	83.58	19.983	-0.34
18AW19860910	2024	-136.13	70.097	20	-6.2
18SN19950803	8029	-139.98	70.538	20	-3.97
18DL20031015	26045	-127.66	71.303	20	-3.87
ZZIC2005SWYD	81	-67.142	84.941	20	-3.85
18SN19950803	8030	-138.43	69.886	20	-3.84
18SN20070726	19083	-139.99	75.984	20	-3.827
18DD19870731	4010	-143.5	72.598	20	-3.8
18SN20150920	38	-150.001	75.0003	20	-3.79
18SN19950803	8024	-136.92	70.48	20	-3.78
18SN20150920	57	-138.02	73.4523	20	-3.76
18SN20150920	35	-149.982	76.9903	20	-3.73
18SN20070726	19100	-139.99	73	20	-3.711
18DL20040401	30007	-126.3	70.046	20	-3.65
18SN20080717	22056	-135.43	76.544	20	-3.6109
18SN19950803	8022	-141.67	71.873	20	-3.61
18AW19860910	2018	-136.85	70.793	20	-3.6
18AW19860910	2021	-136.43	70.358	20	-3.6
18AW19860910	2035	-138.28	69.485	20	-3.6
18DD19870731	4006	-134.6	70.947	20	-3.6
ZZIC2005SWYD	84	-63.264	84.094	20	-3.6
18SN20150920	25	-149.907	78.9972	20	-3.56
18DL20040107	28006	-126.3	70.046	20	-3.55
ZZIC2005SWYD	95	-75.022	83.984	20	-3.54
18DL20040625	32039	-126.3	70.046	20	-3.53
18SN20150920	65	-139.996	70.5733	20	-3.53
18SN19950803	8027	-137.35	70.376	20	-3.51
18AW19860910	2014	-134.2	70.737	20	-3.5
18AW19860910	2017	-134.52	70.993	20	-3.5
18AW19860910	2042	-138.41	69.592	20	-3.5
18SN20150920	17	-139.956	76.9948	20	-3.5
18DL20040401	30001	-126.3	70.046	20	-3.46
18AW19860910	2038	-138.54	69.92	20	-3.4
18DL20040218	29005	-126.3	70.046	20	-3.37
18SN20070726	19043	-156.3	75.666	20	-3.368
18DL20040401	30003	-126.3	70.046	20	-3.34
32H120020505	12	-157.54	73.439	20	-3.33
18SN20080717	22048	-140.07	80.029	20	-3.3043
18AW19860910	2041	-138.82	70.187	20	-3.3
18SN20060805	16030	-157.17	75.477	20	-3.202
18DL20040625	32047	-127.71	71.314	20	-3.2
18SN20050729	15041	-135.97	72.701	20	-3.1702
18DL20040107	28004	-126.3	70.046	20	-3.14
32H120020718	43	-165.4	73.63	20	-3.1
18SN20070726	19020	-139.97	70.401	20	-3.084
18SN20080717	22040	-149.89	79.017	20	-3.0452
18SN20080717	22036	-153.02	78.329	20	-2.9622
18DL20040218	29003	-126.3	70.046	20	-2.92
18DL20040107	28002	-126.3	70.046	20	-2.88
18SN20060805	16012	-131.78	71.817	20	-2.871
18DL20040401	30006	-126.3	70.046	20	-2.76
18SN20070726	19005	-129.97	73.777	20	-2.714
32PZ20020819	11	-177.1	76.433	20	-2.42
316N20061001	24	-60.9727	66.6743	20	-2.27
18SN19970801	10010	-59.917	66.713	20	-2.213
18SN19970801	10009	-60.799	66.519	20	-2.194
32PZ20020819	16	176.33	76.948	20	-2.19
32H120030721	104	-69.778	72.619	20	-2.15
18SN20080717	22015	-152.04	71.396	20	-2.1473
316N20071003	60	-61.1928	66.2495	20	-2.07
18HU20050904	45	-62.6083	67.6772	20	-1.99
18HU20050904	44	-62.767	67.6257	20	-1.97
32H120030721	107	-71.354	72.498	20	-1.96
18HU20050904	41	-60.8097	66.6935	20	-1.92
18SN19970801	10015	-64.667	72	20	-1.895
316N20071003	58	-60.3117	66.2498	20	-1.84
18HU20050904	52	-61.4813	68.1788	20	-1.83
316N20071003	26	-62.0573	67.9183	20	-1.81
316N20061001	78	-61.4843	68.1775	20	-1.37
49NZ20020822	10	-156.72	71.504	20	-1.364
18HU20050904	48	-62.3612	67.7682	20	-1.24
32H120030721	211	-67.002	75.311	20	-1.22
18HU20050904	75	-57.6885	66.9817	20	-1.22
06AQ19870704	364	26.142	85.368	20	-1.1
32H120030721	209	-67.001	74.971	20	-1.08
316N20071003	33	-59.6895	68.496	20	-1.08
316N20071003	36	-59.0912	68.5685	20	-1.05
316N20071003	52	-57.9878	66.2485	20	-1
316N20150906	12	-55.8222	67.1608	20	-0.82
316N20150906	14	-56.3153	67.1067	20	-0.76
06AQ19870704	362	29.33	85.083	20	-0.75
18HU20050904	9	-55.8302	67.1615	20	-0.75
06AQ20070728	285	86.331	82.142	20	-0.745
18HU20050904	12	-56.315	67.115	20	-0.66
316N20040922	6	-56.7033	67.09	20	-0.61
06AQ20070728	283	86.112	81.869	20	-0.587
18HU20050904	13	-56.6815	67.0778	20	-0.57
18HU20050904	15	-57.0352	67.0455	20	-0.39
06AQ19870704	358	30.502	84.025	20	-0.34
06AQ20070728	273	64.753	82.212	20	-0.059
06AQ20070728	267	61.283	82.966	20	-0.057
06AQ20070728	263	60.998	84.172	20	0.006
58AA20000923	106	18.69	77.51	20	0.051
06AQ20070728	284	86.201	82.021	20	0.19
06AQ19870704	269	31.403	81.272	20	0.24
18SN20150920	31	-159.995	75.9897	21	-3.81
18SN20150920	32	-153.295	75.2998	21	-3.79
18SN20150920	9	-139.474	75.265	21	-3.77
18SN20150920	61	-140.001	72.0018	21	-3.76
18SN20080717	22004	-140.01	71.586	21	-3.7414
18SN20070726	19087	-140.06	73.974	21	-3.65
18SN20150920	50	-150.231	71.9633	21	-3.65
18SN20080717	22022	-147.74	74.5	21	-3.6336
18SN20150920	44	-151.23	71.6588	21	-3.63
18SN20150920	42	-149.999	72.998	21	-3.62
18SN20150920	23	-150.006	78.0075	21	-3.61
18DL20040625	32041	-125.84	71.123	21	-3.6
18SN20150920	29	-153.281	78.2723	21	-3.6
18SN20150920	67	-140.025	70.231	21	-3.6
18SN20080717	22064	-140	74.032	21	-3.5871
18SN20150920	34	-149.997	76.0003	21	-3.58
18SN20150920	11	-139.995	76.0023	21	-3.56
18SN20070726	19041	-157.1	75.747	21	-3.539
18SN20070726	19064	-143.24	77.307	21	-3.539
18DL20040625	32057	-124.84	70.321	21	-3.49
77YM19800811	162	-8.85001	81.717	21	-3.49
18SN20070726	19077	-132.48	76.123	21	-3.483
18SN19950803	8026	-135.85	70.5	21	-3.48
18SN20150920	18	-139.988	78.0028	21	-3.48
18SN20070726	19074	-136.51	77.012	21	-3.479
18SN20080717	22024	-149.9	75.021	21	-3.4606
18SN19950803	8021	-139.34	71.206	21	-3.44
18SN20150920	48	-151.412	71.5727	21	-3.44
18SN20070726	19013	-140.05	71.99	21	-3.431
18DL20040625	32042	-125.19	71.301	21	-3.43
18SN20150920	52	-144.701	72.6002	21	-3.43
18SN20070726	19010	-134.81	73.681	21	-3.403
18SN20070726	19038	-155.27	75.513	21	-3.39
18SN20070726	19046	-150	76.999	21	-3.389
18SN20150920	22	-147.068	77.7423	21	-3.38
18SN20070726	19102	-134.3	72.271	21	-3.35
18SN20080717	22029	-149.98	75.996	21	-3.3429
32H120020505	34	-154.5	72.534	21	-3.31
18SN20070726	19034	-149.98	73.984	21	-3.304
18SN20070726	19069	-140.02	77.998	21	-3.271
32H120020505	18	-158.62	72.746	21	-3.27
18SN20080717	22020	-150	73	21	-3.2677
18SN20060805	16050	-140.13	74.012	21	-3.244
18SN20150920	46	-151.921	71.3918	21	-3.22
18SN20150920	19	-142.95	78.0137	21	-3.21
18SN20080717	22059	-130.88	76.084	21	-3.2025
18SN20050729	15024	-149.97	75.989	21	-3.2005
32H120020505	10	-159.84	73.449	21	-3.18
18SN20150920	64	-140.024	70.9987	21	-3.18
18SN20070726	19103	-131.84	71.834	21	-3.176
18SN20070726	19078	-130.01	75.953	21	-3.162
18SN20060805	16014	-139.98	71.998	21	-3.151
18SN20070726	19030	-150.31	71.984	21	-3.143
18SN20060805	16023	-149.94	72.964	21	-3.116
18SN20080717	22005	-140	71.001	21	-3.0739
18SN20070726	19021	-140	70.23	21	-3.071
18SN20080717	22072	-131.9	71.788	21	-3.065
18SN20050729	15043	-131.74	71.756	21	-3.0406
18SN20070726	19057	-154.32	78.337	21	-2.975
18SN20080717	22003	-131.76	71.828	21	-2.9661
18SN20080717	22043	-149.96	82.005	21	-2.9453
18SN20080717	22007	-140	70.575	21	-2.9444
18SN20070726	19025	-152.04	71.401	21	-2.921
18SN20080717	22030	-150.04	76.998	21	-2.9088
18SN20080717	22051	-142.03	77.172	21	-2.8811
18SN20060805	16057	-131.77	71.828	21	-2.834
18SN20060805	16039	-153.21	78.301	21	-2.726
18SN20080717	22014	-151.66	71.501	21	-2.6437
32H120030721	507	-64.116	81.144	21	-2.62
32H120030721	601	-61.611	82.126	21	-2.6
18SN20080717	22017	-151.78	71.468	21	-2.5834
18SN20070726	19023	-152.22	71.326	21	-2.389
32H120020505	37	-155.76	71.65	21	-2.29
18SN19970801	10010	-59.917	66.713	21	-2.192
32H120030721	108	-72.579	72.449	21	-2.12
32H120030721	110	-73.836	72.384	21	-2.08
32PZ20020819	54	-160.86	79.272	21	-1.98
32H120030721	106	-71.354	72.543	21	-1.97
316N20061001	27	-60.0705	66.7605	21	-1.96
32H120030721	202	-66.996	73.054	21	-1.91
316N20071003	24	-62.3652	67.7647	21	-1.91
18SN20060805	16018	-152.21	71.33	21	-1.819
18DL20040218	29001	-126.3	70.046	21	-1.78
18SN19970801	10018	-81.456	75.837	21	-1.765
18HU20050904	25	-60.0695	66.7582	21	-1.76
32H120030721	304	-74.436	78.333	21	-1.69
32H120030721	207	-66.99	74.552	21	-1.68
18HU20050904	22	-59.0553	66.8517	21	-1.67
316N20100804	6	-56.31	67.106	21	-1.39
32H120020505	39	-157.19	71.404	21	-1.32
316N20100804	41	-55.593	69.004	21	-1.22
32H120030721	213	-67.005	75.701	21	-1.18
316N20111002	6	-56.3188	67.1063	21	-0.79
316N20040922	8	-55.8228	67.162	21	-0.76
316N20040922	7	-56.3023	67.1067	21	-0.73
316N20130914	5	-55.822	67.1608	21	-0.69
316N20150906	15	-56.675	67.068	21	-0.69
316N20040922	5	-57.033	67.0393	21	-0.65
316N20130914	6	-56.3162	67.1082	21	-0.63
316N20130914	7	-56.6745	67.0688	21	-0.59
77YM19800811	171	0.867	81.4	21	-0.11
58AA20000923	183	32.765	79.17	21	-0.077
77YM19800811	173	5.117	80.783	21	0.01
77YM19800811	204	46.25	82.017	21	0.16
77YM19800811	203	46.883	81.667	21	0.25
06AQ19930806	36	133.26	78.307	21.075	-0.94
06AQ19930806	48	126.36	77.13	21.175	-1.15
32PZ20020819	27	-179.89	79.962	22	-4.04
18DL20040625	32046	-127.08	71.515	22	-3.83
18SN20070726	19035	-150.13	74.924	22	-3.764
18SN20070726	19050	-149.77	77.943	22	-3.702
18SN20080717	22069	-144.7	72.601	22	-3.689
18SN20080717	22067	-140	73.001	22	-3.6811
18SN20070726	19086	-144.98	74.504	22	-3.657
18SN20090917	24052	-137.91	73.523	22	-3.622
18SN20070726	19063	-146.82	77.713	22	-3.602
18SN20060805	16053	-137.85	73.509	22	-3.597
18SN20080717	22070	-140	72	22	-3.5901
32PZ20020819	112	-158.98	74.892	22	-3.57
18SN20070726	19044	-156.29	75.2	22	-3.563
18SN20070726	19045	-149.96	75.985	22	-3.555
18SN20080717	22066	-138	73.45	22	-3.5367
18SN20080717	22062	-140	75	22	-3.5328
18SN20070726	19101	-136	72.905	22	-3.529
18SN20070726	19068	-140.25	77.041	22	-3.497
18SN20080717	22025	-153.28	75.319	22	-3.3864
18SN20070726	19096	-144.7	72.688	22	-3.373
18SN20070726	19070	-139.94	78.952	22	-3.361
18SN20060805	16034	-150.03	74.986	22	-3.332
18SN20070726	19039	-156.06	75.615	22	-3.313
18SN20080717	22027	-157.09	75.743	22	-3.2707
18SN20090917	24010	-140.02	71.986	22	-3.269
18SN20080717	22054	-140.01	76.992	22	-3.2687
18SN20070726	19002	-122.89	70.546	22	-3.259
32H120020505	9	-160.13	73.282	22	-3.25
18SN20090917	24004	-134.17	72.149	22	-3.249
18SN20080717	22021	-150	74	22	-3.242
18SN20080717	22063	-143.31	74.299	22	-3.2292
18SN20090917	24015	-151.23	71.658	22	-3.226
18SN20090917	24018	-150.17	71.953	22	-3.196
18SN20060805	16026	-156.28	75.588	22	-3.168
18SN20080717	22035	-150.28	77.982	22	-3.1441
18SN20070726	19081	-127.79	75.846	22	-3.136
18SN20090917	24003	-131.78	71.831	22	-3.133
18SN20070726	19015	-140.09	70.965	22	-3.117
18SN20090917	24017	-151.64	71.493	22	-3.101
18SN20070726	19016	-140.05	70.814	22	-3.074
18SN20060805	16037	-149.88	76.959	22	-3.067
18SN20060805	16022	-150.01	72.465	22	-3.066
18SN20060805	16055	-133.73	71.133	22	-3.058
18SN20070726	19061	-150.03	78.999	22	-3.032
18SN20080717	22006	-140.01	70.812	22	-3.0264
18SN20060805	16011	-122.91	70.549	22	-3.018
18SN20060805	16021	-150	72.023	22	-2.997
18SN20090917	24016	-152.04	71.396	22	-2.988
18SN20070726	19028	-151.23	71.657	22	-2.955
18SN20060805	16019	-151.59	71.533	22	-2.954
[truncated: 1,210 more rows]

## Sheet: Figure 2a
Arctic d18Ob - original data by core								Open ocean d18Ob - original data by core
Core	Depth top	Depth bottom	Depth mid	Age (ka)	Cw d18O	1sd		Keigwin & Boyle (1985) on Specmap timescale (Imbrie et al., 1992)				KNR07304-3PG (Curry et al., 1988) 0.37 N 106.18 E 3606 m				Elderfield et al. (2010) ODP 1123
AOS94-B16	0	1	0.5	2.001	3.793			CHN8224-4PC depth (m)	Age model (specmap)	Cw d18O (BK85)		Depth	Age model (ka)	d18Ocw		Age [ka BP]	d18O cw scale
AOS94-B16	1	2	1.5	3.787	3.8965	0.168999		0.02	0.55	2.68		0.1	0.7	2.58		7	6.36
AOS94-B16	2	3	2.5	5.573	3.95			0.06	1.65	2.66		0.135	1.5	2.46		8	7.36
AOS94-B16	3	4	3.5	7.359	3.902			0.08	2.2	2.59		0.17	2.2	2.31		9	8.36
AOS94-B16	4	5	4.5	9.145	4.112			0.12	3.3	2.61		0.2	3.2	2.54		10	9.36
AOS94-B16	5	6	5.5	10.448	3.923			0.16	4.4	2.69		0.27	5.3	2.57		11	10.36
AOS94-B16	7	8	7.5	12.087	4.13			0.2	5.50933	2.67		0.3	6.2	2.64		12	11.36
AOS94-B16	8	9	8.5	12.584	3.707			0.24	6.61867	2.92		0.335	7.3	2.81		13	12.36
AOS94-B16	9	10	9.5	12.757	4.126			0.31	8.56	3.13		0.37	8.4	2.57		14	13.36
AOS94-B16	10	11	10.5	12.93	4.149			0.54	15.175	4.16		0.4	8.9	3.13		15	14.36
AOS94-B16	11	12	11.5	13.14	4.02			0.58	18.175	4.37		0.47	9.8	2.99		16	15.36
AOS94-B16	12	13	12.5	13.387	4.222			0.6	19.675	4.4		0.5	10.2	3.04		17	16.36
AOS94-B16	13	14	13.5	13.633	4.116			0.64	22.3891	4.41		0.535	10.7	3.29		18	17.36
AOS94-B16	14	15	14.5	15.867	3.94	0.132936		0.72	23.8141	4.08		0.6	11.5	3.12		19	18.36
AOS94-B16	17	18	17.5	28.746	3.962			0.74	24.1703	4.09		0.635	13.775	3.37		20	19.36
AOS94-B16	18	19	18.5	33.405	4.18			0.82	25.5953	4.08		0.67	16.05	3.84		21	20.36
AOS94-B16	19	20	19.5	38.065	4.052			0.9	27.0203	3.96		0.7	18	4.01		22	21.36
AOS94-B16	20	21	20.5	40.607	4.346			0.96	28.1871	3.77		0.735	20.275	4		23	22.36
AOS94-B16	21	22	21.5	41.03	4.184			1.09	33.0504	3.93		0.77	22.55	3.8		24	23.36
AOS94-B16	22	23	22.5	41.454	3.95			1.15	35.295	3.81		0.8	24.5	3.59		25	24.36
AOS94-B16	23	24	23.5	42.06	4.29			1.18	36.4173	4.02		0.835	26.775	3.72		26	25.36
AOS94-B16	24	25	24.5	42.847	4.14	0.301227		1.25	39.036	3.78		0.9	31	3.86		27	26.36
AOS94-B16	25	26	25.5	43.634	3.84			1.28	40.1583	3.69		0.95	34.25	4.01		28	27.36
AOS94-B16	26	27	26.5	44.37	3.884			1.32	41.6547	3.93		1.035	39.775	3.78		29	28.36
AOS94-B16	27	28	27.5	45.053	3.884			1.37	43.5252	3.42		1.07	42.05	3.56		30	29.36
AOS94-B16	28	29	28.5	45.736	3.994			1.4	44.3587	3.72		1.1	44	3.67		31	30.36
AOS94-B16	29	30	29.5	46.404	3.879			1.45	45.7135	3.63		1.135	46.275	3.68		32	31.36
AOS94-B16	31	32	31.5	47.71	3.8155	0.000707107		1.47	46.2554	3.91		1.17	48.55	3.56		33	32.36
AOS94-B16	32	33	32.5	48.316	3.85			1.54	48.152	3.76		1.2	50.5	3.65		34	33.36
AOS94-B16	33	34	33.5	48.875	3.759			1.63	50.5906	3.8						35	34.36
AOS94-B17	0	1	0.5	2.696	3.592			1.74	53.5712	3.74						36	35.36
AOS94-B17	1	2	1.5	3.68	3.67			1.78	54.655	3.69						37	36.36
AOS94-B17	2	3	2.5	4.663	3.647			1.83	56.0097	3.52						38	37.36
AOS94-B17	3	4	3.5	5.647	4.045											39	38.36
AOS94-B17	4	5	4.5	6.63	3.86											40	39.36
AOS94-B17	5	6	5.5	7.719	3.811											41	40.36
AOS94-B17	6	7	6.5	8.913	3.86											42	41.36
AOS94-B17	7	8	7.5	10.106	3.897											43	42.36
AOS94-B17	8	9	8.5	11.3	4.041											44	43.36
AOS94-B17	9	10	9.5	12.494	4.295											45	44.36
AOS94-B17	10	11	10.5	13.188	4.34											46	45.36
AOS94-B17	11	12	11.5	13.384	4.299											47	46.36
AOS94-B17	12	13	12.5	13.58	4.291											48	47.36
AOS94-B17	13	14	13.5	13.776	4.03											49	48.36
AOS94-B17	14	15	14.5	13.972	4.043											50	49.36
AOS94-B17	15	16	15.5	15.951	3.992
AOS94-B17	16	17	16.5	19.712	3.992
AOS94-B17	17	18	17.5	23.474	4.015
AOS94-B17	19	20	19.5	30.997	4.007
AOS94-B17	20	21	20.5	33.577	4.324
AOS94-B17	21	22	21.5	34.977	4.058
AOS94-B17	22	23	22.5	36.377	4.071
AOS94-B17	23	24	23.5	37.777	3.752
AOS94-B17	24	25	24.5	39.177	4.027
AOS94-B17	25	26	25.5	40.125	3.81
AOS94-B17	26	27	26.5	40.621	3.828
AOS94-B17	27	28	27.5	41.117	3.8
AOS94-B17	28	29	28.5	41.613	3.729
AOS94-B17	29	30	29.5	42.109	3.782
AOS94-B17	30	31	30.5	42.523	3.768
AOS94-B17	31	32	31.5	42.856	3.921
AOS94-B17	32	33	32.5	43.188	3.782
AOS94-B17	33	34	33.5	43.521	3.936
AOS94-B17	34	35	34.5	43.853	3.876
AOS94-B17	35	36	35.5	44.185	4.61
AOS94-B17	36	37	36.5	44.517	3.958
AOS94-B8	0	1	0.5	4.47	3.649
AOS94-B8	1	2	1.5	5.35	3.7515	0.0304056
AOS94-B8	2	3	2.5	6.23	3.639
AOS94-B8	3	4	3.5	6.88	4.033
AOS94-B8	4	5	4.5	7.32	3.553
AOS94-B8	5	6	5.5	7.75	3.727
AOS94-B8	7	8	7.5	8.07	3.871
AOS94-B8	8	9	8.5	8.13	3.81
AOS94-B8	10	11	10.5	8.26	3.715
AOS94-B8	11	12	11.5	8.33	3.996
AOS94-B8	14	15	14.5	10.88	3.726
AOS94-B8	19	20	19.5	12.34	3.9
AOS94-B8	20	21	20.5	12.57	3.969
AOS94-B8	21	22	21.5	14.71	3.951	0.178191
AOS94-B8	32	33	32.5	41.15	4.116
AOS94-B8	33	34	33.5	41.52	4.162
AOS94-B8	34	35	34.5	41.79	4.132	0.00707107
AOS94-B8	35	36	35.5	42.07	4.215
HLY0503-18tc	0	1	0.5	2.628	3.69
HLY0503-18tc	1	2	1.5	3.408	3.687
HLY0503-18tc	4	5	4.5	5.86	3.721
HLY0503-18tc	6	7	6.5	7.368	3.762
HLY0503-18tc	8	9	8.5	8.38	3.78
HLY0503-18tc	10	11	10.5	9.358	3.915
HLY0503-18tc	12	13	12.5	10.388	3.99
HLY0503-18tc	14	15	14.5	11.564	4.094
HLY0503-18tc	16	17	16.5	12.31	3.922
HLY0503-18tc	18	19	18.5	12.802	4.037
HLY0503-18tc	20	21	20.5	13.01	3.969
HLY0503-18tc	22	23	22.5	13.162	3.83
HLY0503-18tc	23	24	23.5	13.226	4.086
HLY0503-18tc	24	25	24.5	13.352	3.847
HLY0503-18tc	25	26	25.5	13.522	4.133
HLY0503-18tc	26	27	26.5	13.698	4.07
HLY0503-18tc	28	29	28.5	21.906	3.925
HLY0503-18tc	29	30	29.5	27.322	4.262
HLY0503-18tc	30	31	30.5	30.3	4.076

## Sheet: Figure 2b
Planktonic foraminifer abundance per g sediment													AOS94-B16 and HLY0503-18tc new 14C-derived age-depth models
HLY0503-18tc depth (cm)	Age (ka)	PF/g	B8 Depth (cm)	B8 age (ka)	PF #/g	B17 Depth (cm)	B17 age (ka)	PF #/g	B16 Depth (cm)	B16 age (ka)	PF #/g		rBacon: 3 cm thickness, acc=500, default other, DR=0, Marine20
1.5	3.408	725	0.5	4.47	12533	0.5	3.12	7011	0.5	2	11533		B16 depth	B16 mean age	B16 median age	B16 95% min	B16 95% max
3.5	5.014	1475	1.5	5.35	10581	1.5	3.95	5716	1.5	3.79	13466		0.5	2.001	2.028	1.726	2.101
5.5	6.71	1725	2.5	6.23	10491	2.5	4.78	3836	2.5	5.57	14898		1.5	3.787	3.802	3.534	3.94
7.5	7.88	2025	3.5	6.88	11528	3.5	5.61	5845	3.5	7.36	9554		2.5	5.573	5.576	5.342	5.779
9.5	8.874	1060	4.5	7.32	11434	4.5	6.66	4135	4.5	9.15	9138		3.5	7.359	7.35	7.15	7.618
11.5	9.844	680	5.5	7.75	10582	5.5	7.75	4813	5.5	10.45	4839		4.5	9.145	9.13	8.825	9.553
13.5	10.974	980	6.5	8	7892	6.5	8.94	3765	6.5	11.27	5524		5.5	10.448	10.436	10.091	10.878
15.5	11.998	1425	7.5	8.07	5117	7.5	10.12	3006	7.5	12.09	2353		6.5	11.268	11.275	10.853	11.634
17.5	12.61	1700	8.5	8.13	4215	8.5	11.3	3712	8.5	12.58	1222		7.5	12.087	12.114	11.498	12.547
19.5	12.91	1200	9.5	8.2	3773	9.5	12.49	3552	9.5	12.76	494		8.5	12.584	12.604	12.017	13.051
21.5	13.092	450	10.5	8.27	3081	10.5	13.19	3901	10.5	12.93	913		9.5	12.757	12.752	12.41	13.118
23.5	13.226	190	11.5	8.49	5002	11.5	13.39	3733	11.5	13.14	917		10.5	12.93	12.928	12.617	13.249
25.5	13.522	575	12.5	8.87	4777	12.5	13.58	4006	12.5	13.39	778		11.5	13.14	13.132	12.868	13.45
27.5	16.704	950	13.5	9.87	1169	13.5	13.78	1234	13.5	13.63	1906		12.5	13.387	13.377	13.131	13.69
29.5	27.322	725	14.5	10.88	422	14.5	13.97	1256	14.5	15.87	1558		13.5	13.633	13.617	13.23	14.135
31.5	31.386	725	15.5	11.35	125	15.5	15.95	780	15.5	20.09	2804		14.5	15.867	15.829	15.164	16.877
33.5	33.028	500	16.5	11.7	28	16.5	19.72	1206	16.5	24.31	1406		15.5	20.086	19.968	18.35	22.578
35.5	34.228	175	17.5	11.91	83	17.5	23.49	1976	17.5	28.75	633		16.5	24.306	24.115	21.426	28.501
37.5	35.428	120	18.5	12.12	156	18.5	27.26	1754	18.5	33.41	1108		17.5	28.746	28.551	25.941	32.821
39.5	36.628	290	19.5	12.34	1544	19.5	31.04	4150	19.5	38.07	2622		18.5	33.405	33.298	31.87	35.631
41.5	37.828	1150	20.5	15.17	850	20.5	33.62	1963	20.5	40.61	7205		19.5	38.065	38.046	37.426	38.777
43.5	39.028	1375	21.5	17.99	814	21.5	35.01	2035	21.5	41.03	3860		20.5	40.607	40.637	39.69	41.36
45.5	40.228	300	22.5	20.82	70	22.5	36.41	3243	22.5	41.45	4718		21.5	41.03	41.044	40.302	41.679
47.5	41.428	425	23.5	23.65	378	23.5	37.83	9032	23.5	42.06	7242		22.5	41.454	41.46	40.681	42.204
49.5	42.628	950	24.5	27.37	838	24.5	39.23	8025	24.5	42.85	8940		23.5	42.06	42.059	41.268	42.84
51.5	43.828	1925	25.5	31.98	2124	25.5	40.17	7043	25.5	43.63	15620		24.5	42.847	42.837	41.915	43.883
53.5	45.028	2050	26.5	36.7	3016	26.5	40.65	4453	26.5	44.37	13588		25.5	43.634	43.586	42.333	45.177
55.5	46.228	3275	27.5	39.22	2020	27.5	41.14	7055	27.5	45.05	9681		26.5	44.37	44.33	42.812	46.235
57.5	47.428	3700	28.5	39.54	905	28.5	41.63	5961	28.5	45.74	3477		27.5	45.053	44.973	43.158	47.367
59.5	48.628	2325	29.5	39.86	244	29.5	42.1	5753	29.5	46.4	2408		28.5	45.736	45.565	43.409	48.956
61.5	49.828	1950	30.5	40.25	629	30.5	42.51	5144	30.5	47.06	3624		29.5	46.404	46.183	43.816	50.063
63.5	51.028	275	31.5	40.7	326	31.5	42.83	5431	31.5	47.71	6126		30.5	47.057	46.892	44.335	50.862
65.5	52.228	0	32.5	41.15	205	32.5	43.16	6005	32.5	48.32	4666		31.5	47.71	47.547	44.643	51.798
			33.5	41.52	1111	33.5	43.51	7567	33.5	48.88	6986		32.5	48.316	48.166	45.034	52.634
			34.5	41.79	12665	34.5	43.83	6589	34.5	49.44	2557		33.5	48.875	48.746	45.391	53.222
			35.5	42.07	6366	35.5	44.16	4988	35.5	50	2292		rBacon: 3 cm thickness, acc=500, default other, DR=0, Marine20
			36.5	42.35	5671				36.5	50.56	923		18tc depth	18tc mean age	18tc median age	18tc 95% min	18tc 95% max
			37.5	42.63	25372				37.5	51.12	437		0.9	2.941	2.934	2.231	3.7
													1.9	3.724	3.71	2.352	5.214
													2.9	4.507	4.472	2.443	6.763
													3.9	5.349	5.32	3.821	7.043
													4.9	6.199	6.183	5.294	7.208
													5.9	7.048	7.04	6.526	7.562
													6.9	7.582	7.585	7.273	7.903
													7.9	8.082	8.1	7.588	8.476
													8.9	8.582	8.621	7.736	9.248
													9.9	9.069	9.078	8.611	9.46
													10.9	9.554	9.55	9.042	10.066
													11.9	10.04	9.983	9.2	11.137
													12.9	10.62	10.573	10.02	11.449
													13.9	11.21	11.189	10.756	11.792
													14.9	11.8	11.772	11.159	12.518
													15.9	12.129	12.12	11.575	12.715
													16.9	12.43	12.456	11.838	12.883
													17.9	12.731	12.774	11.998	13.228
													18.9	12.85	12.885	12.218	13.313
													19.9	12.949	12.978	12.379	13.365
													20.9	13.047	13.075	12.487	13.451
													21.9	13.118	13.138	12.58	13.528
													22.9	13.185	13.197	12.659	13.629
													23.9	13.252	13.256	12.716	13.771
													24.9	13.417	13.407	12.967	13.927
													25.9	13.592	13.573	13.124	14.142
													26.9	13.768	13.746	13.211	14.465
													27.9	18.659	18.561	17.839	19.973
													28.9	24.074	23.842	22.61	26.756
													29.9	29.488	29.129	27.356	33.522
													30.9	30.844	30.5	28.694	34.93
													31.9	31.749	31.392	29.165	35.941
													32.9	32.654	32.244	29.409	37.805
													33.9	33.284	32.852	29.853	38.572
													34.9	33.884	33.496	30.135	39.4

## Sheet: Figure 3
Arctic d18Ob, BWT, and d18Osw spline fits and +/- 1 RMSE
Core	Age (ka)	interp BWT	spline bwt	spline+RMSE	spline-RMSE	Cw d18O	spline d18O	spline+RMSE	spline-RMSE	d18Osw_eq3	spline d18Osw	spline+RMSE	spline-RMSE
AOS94-B16	2.001	0.248571	0.0376264	0.366626	-0.291374	3.793	3.71359	3.87769	3.54949	0.514214	0.393623	0.563623	0.223623
HLY0503-18tc	2.628	-0.24375	0.0430864	0.372086	-0.285914	3.69	3.70041	3.86451	3.53631	0.312552	0.383522	0.553522	0.213522
AOS94-B17	2.696	-0.1825	0.0474759	0.376476	-0.281524	3.592	3.70214	3.86624	3.53804	0.226827	0.378165	0.548165	0.208165
HLY0503-18tc	3.408	0.3935	0.102445	0.431445	-0.226555	3.687	3.7071	3.8712	3.543	0.437257	0.398231	0.568231	0.228231
AOS94-B17	3.68	0.086	0.108605	0.437605	-0.220395	3.67	3.71801	3.88211	3.55391	0.358634	0.410133	0.580133	0.240133
AOS94-B16	3.787	-0.0386667	0.117559	0.446559	-0.211441	3.8965	3.71798	3.88208	3.55388	0.560151	0.415793	0.585793	0.245793
AOS94-B8	4.47	0.2835	0.105771	0.434771	-0.223229	3.649	3.74494	3.90904	3.58084	0.377213	0.43423	0.60423	0.26423
AOS94-B17	4.663	0.555	0.0772308	0.406231	-0.251769	3.647	3.75238	3.91648	3.58828	0.429622	0.441994	0.611994	0.271994
AOS94-B8	5.35	-0.1975	-0.0332478	0.295752	-0.362248	3.7515	3.79593	3.96003	3.63183	0.383321	0.461029	0.631029	0.291029
AOS94-B16	5.573	-0.11875	-0.0710118	0.257988	-0.400012	3.95	3.80367	3.96777	3.63957	0.597602	0.457283	0.627283	0.287283
AOS94-B17	5.647	-0.165	-0.0788893	0.250111	-0.407889	4.045	3.80105	3.96515	3.63695	0.683334	0.463093	0.633093	0.293093
HLY0503-18tc	5.86	-0.224	-0.112985	0.216015	-0.441985	3.721	3.8108	3.9749	3.6467	0.34751	0.45609	0.62609	0.28609
AOS94-B8	6.23	0.107667	-0.133417	0.195583	-0.462417	3.639	3.81068	3.97478	3.64658	0.331976	0.458247	0.628247	0.288247
AOS94-B17	6.63	-0.193	-0.120571	0.208429	-0.449571	3.86	3.8117	3.9758	3.6476	0.492723	0.462038	0.632038	0.292038
AOS94-B8	6.88	-0.118	-0.0806247	0.248375	-0.409625	4.033	3.81328	3.97738	3.64918	0.680753	0.465825	0.635825	0.295825
AOS94-B8	7.32	-0.234583	0.036391	0.365391	-0.292609	3.553	3.81065	3.97475	3.64655	0.177389	0.48464	0.65464	0.31464
AOS94-B16	7.359	-0.270417	0.0561586	0.385159	-0.272841	3.902	3.80985	3.97395	3.64575	0.519208	0.489766	0.659766	0.319766
HLY0503-18tc	7.368	-0.279375	0.0612197	0.39022	-0.26778	3.762	3.80992	3.97402	3.64582	0.377413	0.488839	0.658839	0.318839
AOS94-B17	7.719	-0.439	0.226616	0.555616	-0.102384	3.811	3.81608	3.98018	3.65198	0.394424	0.535763	0.705763	0.365763
AOS94-B8	7.75	-0.235	0.246402	0.575402	-0.0825985	3.727	3.81313	3.97723	3.64903	0.351306	0.536826	0.706826	0.366826
AOS94-B8	8.07	0.757833	0.406557	0.735557	0.0775575	3.871	3.83218	3.99628	3.66808	0.69427	0.588093	0.758093	0.418093
AOS94-B8	8.13	0.638833	0.435771	0.764771	0.106771	3.81	3.83465	3.99875	3.67055	0.609422	0.592342	0.762342	0.422342
AOS94-B8	8.26	1.01	0.491075	0.820075	0.162075	3.715	3.83775	4.00185	3.67365	0.588804	0.610617	0.780617	0.440617
AOS94-B8	8.33	1.32	0.515466	0.844466	0.186466	3.996	3.84337	4.00747	3.67927	0.931928	0.623246	0.793246	0.453246
HLY0503-18tc	8.38	1.27	0.530615	0.859615	0.201615	3.78	3.85076	4.01486	3.68666	0.705908	0.623646	0.793646	0.453646
AOS94-B17	8.913	0.836444	0.587024	0.916024	0.258024	3.86	3.88741	4.05151	3.72331	0.699023	0.675606	0.845606	0.505606
AOS94-B16	9.145	0.511111	0.576921	0.905921	0.247921	4.112	3.9036	4.0677	3.7395	0.885827	0.683798	0.853798	0.513798
HLY0503-18tc	9.358	-0.207333	0.557482	0.886482	0.228482	3.915	3.90612	4.07022	3.74202	0.54485	0.698313	0.868313	0.528313
AOS94-B17	10.106	0.28775	0.492879	0.821879	0.163879	3.897	3.92762	4.09172	3.76352	0.626065	0.69804	0.86804	0.52804
HLY0503-18tc	10.388	0.382	0.489946	0.818946	0.160946	3.99	3.93664	4.10074	3.77254	0.737953	0.704855	0.874855	0.534855
AOS94-B16	10.448	0.416667	0.484259	0.813259	0.155259	3.923	3.94108	4.10518	3.77698	0.6779	0.706231	0.876231	0.536231
AOS94-B8	10.88	0.3445	0.496945	0.825945	0.167945	3.726	3.94802	4.11212	3.78392	0.466438	0.719932	0.889932	0.549932
AOS94-B17	11.3	0.558889	0.493438	0.822438	0.164438	4.041	3.97454	4.13864	3.81044	0.824401	0.749858	0.919858	0.579858
HLY0503-18tc	11.564	0.852	0.484689	0.813689	0.155689	4.094	3.99187	4.15597	3.82777	0.936141	0.753447	0.923447	0.583447
AOS94-B16	12.087	0.821417	0.408581	0.737581	0.0795815	4.13	4.01471	4.17881	3.85061	0.966012	0.764405	0.934405	0.594405
HLY0503-18tc	12.31	0.62525	0.351656	0.680656	0.0226564	3.922	4.02771	4.19181	3.86361	0.7187	0.767563	0.937563	0.597563
AOS94-B8	12.34	0.5985	0.347347	0.676347	0.0183467	3.9	4.02729	4.19139	3.86319	0.691339	0.770218	0.940218	0.600218
AOS94-B17	12.494	0.3515	0.311451	0.640451	-0.0175486	4.295	4.03058	4.19468	3.86648	1.03684	0.765973	0.935973	0.595973
AOS94-B8	12.57	0.253	0.292234	0.621234	-0.0367655	3.969	4.03921	4.20331	3.87511	0.691101	0.770601	0.940601	0.600601
AOS94-B16	12.584	0.242	0.288682	0.617682	-0.040318	3.707	4.0378	4.2019	3.8737	0.426897	0.766464	0.936464	0.596464
AOS94-B16	12.757	0.044	0.247619	0.576619	-0.0813814	4.126	4.04784	4.21194	3.88374	0.806218	0.767968	0.937968	0.597968
HLY0503-18tc	12.802	0	0.2351	0.5641	-0.0938996	4.037	4.05131	4.21541	3.88721	0.7084	0.770875	0.940875	0.600875
AOS94-B16	12.93	0.0585	0.209513	0.538513	-0.119487	4.149	4.06115	4.22525	3.89705	0.832123	0.777516	0.947516	0.607516
HLY0503-18tc	13.01	0.0904	0.199658	0.528658	-0.129342	3.969	4.06574	4.22984	3.90164	0.658516	0.776097	0.946097	0.606097
AOS94-B16	13.14	0.0956	0.181279	0.510279	-0.147721	4.02	4.0736	4.2377	3.9095	0.710558	0.782263	0.952263	0.612263
HLY0503-18tc	13.162	0.0964	0.180625	0.509625	-0.148375	3.83	4.07458	4.23868	3.91048	0.520719	0.783107	0.953107	0.613107
AOS94-B17	13.188	0.0976	0.179969	0.508969	-0.149031	4.34	4.07599	4.24009	3.91189	1.03096	0.784391	0.954391	0.614391
HLY0503-18tc	13.226	0.0992	0.179703	0.508703	-0.149297	4.086	4.07376	4.23786	3.90966	0.77728	0.78212	0.95212	0.61212
HLY0503-18tc	13.352	0.104	0.183054	0.512054	-0.145946	3.847	4.07919	4.24329	3.91509	0.539242	0.788278	0.958278	0.618278
AOS94-B17	13.384	0.1052	0.174849	0.503849	-0.154151	4.299	4.08206	4.24616	3.91796	0.991482	0.791529	0.961529	0.621529
AOS94-B16	13.387	0.1056	0.17553	0.50453	-0.15347	4.222	4.08532	4.24942	3.92122	0.914562	0.79494	0.96494	0.62494
HLY0503-18tc	13.522	0.122	0.189245	0.518245	-0.139755	4.133	4.08862	4.25272	3.92452	0.828849	0.793109	0.963109	0.623109
AOS94-B17	13.58	0.158	0.190782	0.519782	-0.138218	4.291	4.08693	4.25103	3.92283	0.994063	0.799805	0.969805	0.629805
AOS94-B16	13.633	0.188	0.196358	0.525358	-0.132642	4.116	4.08182	4.24592	3.91772	0.825075	0.791879	0.961879	0.621879
HLY0503-18tc	13.698	0.23	0.207527	0.536527	-0.121473	4.07	4.08514	4.24924	3.92104	0.787492	0.795533	0.965533	0.625533
AOS94-B17	13.776	0.278	0.217781	0.546781	-0.111219	4.03	4.08369	4.24779	3.91959	0.757111	0.796256	0.966256	0.626256
AOS94-B17	13.972	0.392	0.257348	0.586348	-0.0716523	4.043	4.08091	4.24501	3.91681	0.792957	0.803676	0.973676	0.633676
AOS94-B8	14.71	0.521	0.449953	0.778953	0.120953	3.951	4.03935	4.20345	3.87525	0.726808	0.797328	0.967328	0.627328
AOS94-B16	15.867	0.894429	0.784598	1.1136	0.455598	3.94	3.98065	4.14475	3.81655	0.790643	0.809312	0.979312	0.639312
AOS94-B17	15.951	0.897857	0.797068	1.12607	0.468068	3.992	3.97987	4.14397	3.81577	0.843331	0.81297	0.98297	0.64297
AOS94-B17	19.712	1.14542	1.32891	1.65791	0.999911	3.992	3.96101	4.12511	3.79691	0.892942	0.897877	1.06788	0.727877
HLY0503-18tc	21.906	1.92055	1.86991	2.19891	1.54091	3.925	3.9577	4.1218	3.7936	0.981277	1.00382	1.17382	0.833823
AOS94-B17	23.474	2.13086	1.947	2.276	1.618	4.015	4.02311	4.18721	3.85901	1.11342	1.08599	1.25599	0.915986
HLY0503-18tc	27.322	0.742	0.828252	1.15725	0.499252	4.262	4.15407	4.31817	3.98997	1.0821	0.992142	1.16214	0.822142
AOS94-B16	28.746	0.4125	0.802723	1.13172	0.473723	3.962	4.0666	4.2307	3.9025	0.716065	0.894468	1.06447	0.724468
HLY0503-18tc	30.3	1.35333	1.12198	1.45098	0.792982	4.076	4.04525	4.20935	3.88115	1.01861	0.942421	1.11242	0.772421
AOS94-B17	30.997	1.624	1.12132	1.45032	0.79232	4.007	4.07034	4.23444	3.90624	1.00385	0.970768	1.14077	0.800768
AOS94-B16	33.405	0.026	0.538827	0.867827	0.209827	4.18	4.19378	4.35788	4.02968	0.85661	0.972826	1.14283	0.802826
AOS94-B17	33.577	0.2148	0.55745	0.88645	0.22845	4.324	4.19723	4.36133	4.03313	1.03845	0.976266	1.14627	0.806266
AOS94-B17	34.977	1.48618	0.947267	1.27627	0.618267	4.058	4.11809	4.28219	3.95399	1.02723	0.981524	1.15152	0.811524
AOS94-B17	36.377	1.192	1.23606	1.56506	0.907056	4.071	4.01898	4.18308	3.85488	0.981277	0.940124	1.11012	0.770124
AOS94-B17	37.777	1.068	1.29324	1.62224	0.964237	3.752	3.9486	4.1127	3.7845	0.637427	0.877329	1.04733	0.707329
AOS94-B16	38.065	1.5605	1.28591	1.61491	0.956908	4.052	3.94779	4.11189	3.78369	1.03612	0.872913	1.04291	0.702913
AOS94-B17	39.177	1.2628	1.15656	1.48556	0.827556	4.027	3.96418	4.12828	3.80008	0.951465	0.871013	1.04101	0.701013
AOS94-B17	40.125	1.803	0.9843	1.3133	0.6553	3.81	3.99469	4.15879	3.83059	0.842721	0.864334	1.03433	0.694334
AOS94-B16	40.607	0.388	0.928403	1.2574	0.599403	4.346	4.00753	4.17163	3.84343	1.09516	0.863587	1.03359	0.693587
AOS94-B17	40.621	0.366	0.926342	1.25534	0.597342	3.828	4.00981	4.17391	3.84571	0.572746	0.871453	1.04145	0.701453
AOS94-B16	41.03	0.446	0.971391	1.30039	0.642391	4.184	4.02276	4.18686	3.85866	0.944778	0.889863	1.05986	0.719863
AOS94-B17	41.117	0.644	1.00121	1.33021	0.672214	3.8	4.01912	4.18322	3.85502	0.600458	0.890363	1.06036	0.720363
AOS94-B8	41.15	0.71	1.00535	1.33435	0.676345	4.116	4.01516	4.17926	3.85106	0.929684	0.891291	1.06129	0.721291
AOS94-B16	41.454	1.37	1.10238	1.43138	0.773384	3.95	4.01775	4.18185	3.85365	0.895948	0.905814	1.07581	0.735814
AOS94-B8	41.52	1.461	1.12793	1.45693	0.798932	4.162	4.01901	4.18311	3.85491	1.12618	0.910247	1.08025	0.740247
AOS94-B17	41.613	1.3755	1.15381	1.48281	0.82481	3.729	4.01485	4.17895	3.85075	0.67605	0.915244	1.08524	0.745244
AOS94-B8	41.79	1.272	1.22068	1.54968	0.891675	4.132	4.01486	4.17896	3.85076	1.05831	0.926537	1.09654	0.756537
AOS94-B16	42.06	1.5145	1.30267	1.63167	0.97367	4.29	4.00537	4.16947	3.84127	1.26491	0.941359	1.11136	0.771359
AOS94-B8	42.07	1.48525	1.29602	1.62502	0.967018	4.215	4.00001	4.16411	3.83591	1.18404	0.940647	1.11065	0.770647
AOS94-B17	42.109	1.36825	1.30913	1.63813	0.980127	3.782	4.0055	4.1696	3.8414	0.727597	0.934686	1.10469	0.764686
AOS94-B17	42.523	1.668	1.38663	1.71563	1.05763	3.768	3.98444	4.14854	3.82034	0.773667	0.938977	1.10898	0.768977
AOS94-B16	42.847	1.23722	1.41729	1.74629	1.08829	4.14	3.97639	4.14049	3.81229	1.05934	0.9307	1.1007	0.7607
AOS94-B17	42.856	1.22178	1.42247	1.75147	1.09347	3.921	3.97717	4.14127	3.81307	0.837244	0.9285	1.0985	0.7585
AOS94-B17	43.188	1.38237	1.43429	1.76329	1.10529	3.782	3.97434	4.13844	3.81024	0.730428	0.92986	1.09986	0.75986
AOS94-B17	43.521	1.926	1.41952	1.74852	1.09052	3.936	3.97297	4.13707	3.80887	0.99337	0.935508	1.10551	0.765508
AOS94-B16	43.634	1.531	1.41688	1.74588	1.08788	3.84	3.98016	4.14426	3.81606	0.818212	0.93195	1.10195	0.76195
AOS94-B17	43.853	1.38	1.39519	1.72419	1.06619	3.876	3.98393	4.14803	3.81983	0.823952	0.941267	1.11127	0.771267
AOS94-B17	44.185	1.0385	1.35824	1.68724	1.02924	4.61	3.99766	4.16176	3.83356	1.48952	0.939518	1.10952	0.769518
AOS94-B16	44.37	1.37925	1.34396	1.67296	1.01496	3.884	4.00222	4.16632	3.83812	0.831802	0.939432	1.10943	0.769432
AOS94-B17	44.517	1.162	1.33777	1.66677	1.00877	3.958	3.99446	4.15856	3.83036	0.862265	0.936403	1.1064	0.766403
AOS94-B16	45.053	0.9875	1.33415	1.66315	1.00515	3.884	3.98451	4.14861	3.82041	0.753295	0.921876	1.09188	0.751876
AOS94-B16	45.736	1.334	1.40674	1.73574	1.07774	3.994	3.95384	4.11794	3.78974	0.932734	0.903977	1.07398	0.733977
AOS94-B16	46.404	2.01	1.45682	1.78582	1.12782	3.879	3.91266	4.07676	3.74856	0.953204	0.879088	1.04909	0.709088
AOS94-B16	47.71	1.20381	1.32319	1.65219	0.994188	3.8155	3.83772	4.00182	3.67362	0.728144	0.77671	0.94671	0.60671
AOS94-B16	48.316	1.1695	1.20177	1.53077	0.872769	3.85	3.80991	3.97401	3.64581	0.755768	0.720185	0.890185	0.550185
AOS94-B16	48.875	1.074	1.09388	1.42288	0.764884	3.759	3.77721	3.94131	3.61311	0.64563	0.66745	0.83745	0.49745

## Sheet: Figure 4abc
Core	Water depth	Species	Core depth (cm)	Age (ka)	∆age	d18Ob normalized to C. wuellerstorfi	replicate 1sd	Matched Krithe Species	Mg/Ca (mmol mol-1)	Mg:KMinimaCorr.77*	BWT (°C)	Interpolated BWT (°C)	d18Ob 3 pt smooth	d18Osw_M&L-S99	d18Osw 3 pt smooth		Core	WaterDepth	Krithe Species	CoreDepth (cm)	Age (ka)	Mg/Ca (mmol mol-1)	Mg:KMinimaCorr.77*	BWT (°C)	5-PointMg:KMinCorr.77*	BWT (°C)
B16	1533	C.wuellerstorfi	0.5	2.001	0.627	3.793						0.248571		0.514214			PS-2179-3	1228	min	0	0	17.42	13.4134	0.748483
HLY-18TC	2598	C.wuellerstorfi	0.5	2.628	0.068	3.69		hunti	10.5326	10.5326	-0.516185	-0.24375	2.44167	0.312552	0.351198		PS-2186-3	2004	min	0.5	0.422297	18.94	14.5838	1.26229
B17	2217	C.wuellerstorfi	0.5	2.696	0.712	3.592						-0.1825	2.91067	0.226827	0.325546		P1-94-AR-B28	1990	min	0.5	0.464554	14.2192	10.9488	-0.333492	11.8244	0.0509226
HLY-18TC	2598	C.wuellerstorfi	1.5	3.408	0.272	3.687						0.3935	3.26133	0.437257	0.340906		PS-2206-4	2993	hunti	0.5	0.786164	9.05714	9.05714	-1.16392	11.5048	-0.0894089
B17	2217	C.wuellerstorfi	1.5	3.68	0.107	3.67		hunti	11.9834	11.9834	0.120724	0.086	3.625	0.358634	0.452014		PS-2163-1	3040	hunti	0.5	0.869565	11.119	11.119	-0.25875	11.4348	-0.120103
B16	1533	C.wuellerstorfi	1.5	3.787	0.683	3.8965	0.168999					-0.0386667	3.979	0.560151	0.432		PS-2186-3	2004	min	1.5	1.26689	15.3443	11.8151	0.0468253	11.7425	0.0149389
B8	1031	C.wuellerstorfi	0.5	4.47	0.01	3.649		hunti	11.1295	11.1295	-0.254165	0.2835	4.24567	0.377213	0.412896		P1-94-AR-B28	1990	hunti	1.5	1.39366	14.2342	14.2342	1.10882	12.2774	0.249765
P30	765	C. teretis	1	4.48	0.183	3.568						0.309	4.53767	0.301324	0.369386		P1-94-AR-B28	1990	min	1.5	1.39366	16.2167	12.4868	0.341716	12.5088	0.351358
B17	2217	C.wuellerstorfi	2.5	4.663	0.687	3.647						0.555	4.831	0.429622	0.371422		PS-2186-3	2004	min	2.5	2.11149	15.236	11.7317	0.0102126	12.2525	0.238856
B8	1031	C.wuellerstorfi	1.5	5.35	0.223	3.7515	0.0304056	hunti	11.2667	11.2667	-0.193937	-0.1975	5.19533	0.383321	0.470182		Pl-94AR-BC19B	2400	hunti	0.5	2.22913	12.2761	12.2761	0.249217	11.6337	-0.0328157
B16	1533	C.wuellerstorfi	2.5	5.573	0.074	3.95						-0.11875	5.52333	0.597602	0.554752		PS-2206-4	2993	hunti	1.5	2.35849	10.5337	10.5337	-0.515684	11.4001	-0.135362
B17	2217	C.wuellerstorfi	3.5	5.647	0.1525	4.045						-0.165	5.67317	0.683334	0.633571		PS-2179-3	1228	hunti	0.5	2.58802	11.14	11.14	-0.24954	11.2649	-0.194707
P39	1470	C. teretis	1	5.7995	0.0605	3.99146						-0.215	5.76883	0.619776	0.550207		PS-2163-1	3040	hunti	1.5	2.6087	11.3189	11.3189	-0.171016	10.9162	-0.347787
HLY-18TC	2598	C.wuellerstorfi	4.5	5.86	0.37	3.721						-0.224	5.96317	0.34751	0.433088		PS-2186-3	2004	min	3.5	2.95608	14.3582	11.0558	-0.286509	11.3597	-0.153109
B8	1031	C.wuellerstorfi	2.5	6.23	0.2282	3.639		hunti	11.1819	11.1819	-0.231131	0.107667	6.18273	0.331976	0.294713		HLY0503-18TC	2654	hunti	0.5	3.04097	10.5326	10.5326	-0.516185	11.6556	-0.0231976
P40	700	C. teretis	4	6.4582	0.1718	3.56091		K. hunti	13.1141	13.1141	0.617102	-0.138	6.4394	0.204651	0.343117		Pl-94AR-BC12A	1609	hunti	1.5	3.04691	12.751	12.751	0.457705	12.6437	0.410587
B17	2217	C.wuellerstorfi	4.5	6.63	0.25	3.86						-0.193	6.65607	0.492723	0.459376		PS2185-4	1051	hunti	2.5	3.15657	12.2829	12.2829	0.252199	12.5475	0.368359
B8	1031	C.wuellerstorfi	3.5	6.88	0.44	4.033		hunti	11.1448	11.1448	-0.247449	-0.118	6.94333	0.680753	0.450288		P1-94-AR-B28	1990	hunti	3.5	3.25188	16.5962	16.5962	2.14573	12.8377	0.495741
B8	1031	C.wuellerstorfi	4.5	7.32	0.039	3.553		hunti	10.8176	10.8176	-0.391058	-0.234583	7.18633	0.177389	0.459117		P1-94-AR-B28	1990	min	3.5	3.25188	13.7336	10.5748	-0.497647	12.9379	0.53974
B16	1533	C.wuellerstorfi	3.5	7.359	0.009	3.902						-0.270417	7.349	0.519208	0.358004		P1-94-AR-B17	2217	hunti	1.5	3.48451	11.9834	11.9834	0.120724	12.3702	0.290538
HLY-18TC	2598	C.wuellerstorfi	6.5	7.368	0.351	3.762		hunti	12.3826	12.3826	0.295943	-0.279375	7.482	0.377413	0.430349		PS-2186-3	2004	min	4.5	3.80068	17.2106	13.2522	0.6777	11.585	-0.0541909
B17	2217	C.wuellerstorfi	5.5	7.719	0.00025	3.811						-0.439	7.60208	0.394424	0.445087		HLY0503-18TC	2654	hunti	2.5	3.89359	9.44462	9.44462	-0.993812	11.6959	-0.00549449
P15	2627	C. wuellerstorfi	5.5	7.71925	0.03075	3.98						-0.439	7.72942	0.563424	0.436385		PS-2206-4	2993	hunti	2.5	3.93082	12.6699	12.6699	0.422082	11.6071	-0.0444681
B8	1031	C.wuellerstorfi	5.5	7.75	0.32	3.727		hunti	11.5084	11.5084	-0.0878293	-0.235	7.84642	0.351306	0.536333		P1-94-AR-B8	1031	hunti	0.5	3.98193	11.1295	11.1295	-0.254165	11.4247	-0.124556
B8	1031	C.wuellerstorfi	7.5	8.07	0.06	3.871		hunti	10.8139	10.8139	-0.392678	0.757833	7.98333	0.69427	0.551666		P1-94-AR-B8	1031	min	0.5	3.98193	14.9864	11.5395	-0.0741441	12.0456	0.148009
B8	1031	C.wuellerstorfi	8.5	8.13	0.13	3.81		hunti	10.8657	10.8657	-0.369966	0.638833	8.15333	0.609422	0.630832		PS-2179-3	1228	hunti	2.5	4.04894	12.34	12.34	0.27726	11.3793	-0.144481
B8	1031	C.wuellerstorfi	10.5	8.26	0.07	3.715		hunti	10.604	10.604	-0.484836	1.01	8.24	0.588804	0.710051		Pl-94AR-BC19B	2400	hunti	1.5	4.06804	12.549	12.549	0.36901	11.4201	-0.126591
B8	1031	C.wuellerstorfi	11.5	8.33	0.05	3.996		hunti	10.6321	10.6321	-0.472513	1.32	8.32333	0.931928	0.742213		P1-94-AR-B28	1990	min	4.5	4.18099	12.128	9.33857	-1.04037	11.2812	-0.187555
HLY-18TC	2598	C.wuellerstorfi	8.5	8.38	0.533	3.78						1.27	8.541	0.705908	0.778953		Pl-94AR-BC26B	1020	min	0.5	4.2093	14.7185	11.3332	-0.164716	11.0665	-0.281795
B17	2217	C.wuellerstorfi	6.5	8.913	0.232	3.86						0.836444	8.81267	0.699023	0.763586		PS-2163-1	3040	hunti	2.5	4.34783	10.8452	10.8452	-0.378964	11.3594	-0.153219
B16	1533	C.wuellerstorfi	4.5	9.145	0.213	4.112						0.511111	9.13867	0.885827	0.7099		P1-94-AR-B8	1031	hunti	1.5	4.45744	11.2667	11.2667	-0.193937	12.1205	0.180888
HLY-18TC	2598	C.wuellerstorfi	10.5	9.358	0.748	3.915		hunti	11.7619	11.7619	0.0234554	-0.207333	9.53633	0.54485	0.685581		P1-94-AR-B8	1031	min	1.5	4.45744	18.1992	14.0134	1.01189	12.9438	0.542342
B17	2217	C.wuellerstorfi	7.5	10.106	0.282	3.897						0.28775	9.95067	0.626065	0.636289		PS-2186-3	2004	min	5.5	4.64527	17.07	13.1439	0.630172	13.0112	0.571908
HLY-18TC	2598	C.wuellerstorfi	12.5	10.388	0.06	3.99						0.382	10.314	0.737953	0.680639		PS-2179-3	1228	hunti	3.5	4.7794	15.45	15.45	1.64255	12.8851	0.516568
B16	1533	C.wuellerstorfi	5.5	10.448	0.07825	3.923						0.416667	10.4541	0.6779	0.626672		P1-94-AR-B8	1031	hunti	2.5	4.93295	11.1819	11.1819	-0.231131	12.3845	0.296793
P15	2627	C. wuellerstorfi	7.5	10.5262	0.35375	3.7						0.462889	10.6181	0.464163	0.536167		P1-94-AR-B28	1990	min	5.5	5.1101	13.8135	10.6364	-0.470637	11.9847	0.121269
B8	1031	C.wuellerstorfi	14.5	10.88	0.42	3.726		hunti	11.0758	11.0758	-0.27772	0.3445	10.9021	0.466438	0.585001		Pl-94AR-BC20A	3110	hunti	1.5	5.15631	11.5103	11.5103	-0.0869897	10.9369	-0.338682
B17	2217	C.wuellerstorfi	8.5	11.3	0.1463	4.041						0.558889	11.2088	0.824401	0.614254		P1-94-AR-B8	1031	hunti	3.5	5.40846	11.1448	11.1448	-0.247449	11.3386	-0.162365
P40	700	C. teretis	10.5	11.4463	0.1177	3.73072						0.7475	11.4368	0.551923	0.770822		P1-94-AR-B8	1031	min	3.5	5.40846	13.2615	10.2114	-0.657204	11.3912	-0.13925
HLY-18TC	2598	C.wuellerstorfi	14.5	11.564	0.523	4.094						0.852	11.6991	0.936141	0.818025		PS-2186-3	2004	min	6.5	5.48986	17.13	13.1901	0.650454	11.6312	-0.0339144
B16	1533	C.wuellerstorfi	7.5	12.087	0.223	4.13						0.821417	11.987	0.966012	0.873618		PS-2206-4	2993	hunti	3.5	5.50314	10.8996	10.8996	-0.355064	11.3503	-0.157209
HLY-18TC	2598	C.wuellerstorfi	16.5	12.31	0.03	3.922						0.62525	12.2457	0.7187	0.792017		PS-2179-3	1228	hunti	4.5	5.50986	12.71	12.71	0.43969	11.7846	0.0334206
B8	1031	C.wuellerstorfi	19.5	12.34	0.154	3.9						0.5985	12.3813	0.691339	0.815627		PS-2179-3	1228	min	4.5	5.50986	12.65	9.7405	-0.86392	11.2368	-0.207054
B17	2217	C.wuellerstorfi	9.5	12.494	0.076	4.295						0.3515	12.468	1.03684	0.806427		HLY0503-18TC	2654	hunti	6.5	5.59884	12.3826	12.3826	0.295943	11.4076	-0.13206
B8	1031	C.wuellerstorfi	20.5	12.57	0.014	3.969		hunti	9.58651	9.58651	-0.931524	0.253	12.5493	0.691101	0.71828		PS2185-4	1051	hunti	4.5	5.68182	10.4512	10.4512	-0.55192	11.0291	-0.29821
B16	1533	C.wuellerstorfi	8.5	12.584	0.173	3.707						0.242	12.637	0.426897	0.641405		PS2185-4	1051	min	4.5	5.68182	15.2646	11.7538	0.0199077	11.4875	-0.0970074
B16	1533	C.wuellerstorfi	9.5	12.757	0.045	4.126						0.044	12.7143	0.806218	0.647171		P1-94-AR-B8	1031	hunti	4.5	5.88398	10.8176	10.8176	-0.391058	11.1786	-0.232606
HLY-18TC	2598	C.wuellerstorfi	18.5	12.802	0.128	4.037		hunti	13.2718	13.2718	0.686328	0	12.8297	0.7084	0.782247		HLY0503-18TC	2654	hunti	7.5	6.02515	12.0321	12.0321	0.14209	11.2431	-0.204299
B16	1533	C.wuellerstorfi	10.5	12.93	0.08	4.149						0.0585	12.914	0.832123	0.733013		P1-94-AR-B28	1990	min	6.5	6.03921	14.0755	10.8382	-0.382052	11.1407	-0.249233
HLY-18TC	2598	C.wuellerstorfi	20.5	13.01	0.13	3.969						0.0904	13.0267	0.658516	0.733733		PS-2163-1	3040	hunti	3.5	6.08696	10.7736	10.7736	-0.410382	11.5712	-0.0602551
B16	1533	C.wuellerstorfi	11.5	13.14	0.022	4.02						0.0956	13.104	0.710558	0.629931		P1-92-AR-P39	1470	K. minima	1.5	6.19425	14.6	11.242	-0.204762	11.1073	-0.263916
HLY-18TC	2598	C.wuellerstorfi	22.5	13.162	0.026	3.83						0.0964	13.1633	0.520719	0.754079		PS-2179-3	1228	hunti	5.5	6.24032	12.97	12.97	0.55383	12.1172	0.17943
B17	2217	C.wuellerstorfi	10.5	13.188	0.038	4.34						0.0976	13.192	1.03096	0.776319		PS2179-1-GKG	1230	min	5.5	6.24032	12.6136	9.71249	-0.876215	12.2149	0.222327
HLY-18TC	2598	C.wuellerstorfi	23.5	13.226	0.10725	4.086						0.0992	13.2491	0.77728	0.790107		Pl-94AR-BC26B	1020	hunti	1.5	6.32347	15.8877	15.8877	1.83468	12.4489	0.325088
P15	2627	C. wuellerstorfi	9.5	13.3332	0.01875	3.87						0.1032	13.3037	0.562081	0.626201		Pl-94AR-BC26B	1020	min	1.5	6.32347	14.6262	11.2622	-0.1959	12.1566	0.196756
HLY-18TC	2598	C.wuellerstorfi	24.5	13.352	0.032	3.847						0.104	13.3564	0.539242	0.697602		PS-2186-3	2004	min	7.5	6.33446	16.12	12.4124	0.309044	12.2063	0.218585
B17	2217	C.wuellerstorfi	11.5	13.384	0.003	4.299						0.1052	13.3743	0.991482	0.815095		P1-94-AR-B8	1031	hunti	5.5	6.35949	11.5084	11.5084	-0.0878293	11.6516	-0.0249313
B16	1533	C.wuellerstorfi	12.5	13.387	0.135	4.222						0.1056	13.431	0.914562	0.911631		PS2163-2 GKG	3047	hunti	5.5	6.35949	9.96111	9.96111	-0.767073	11.4085	-0.131653
HLY-18TC	2598	C.wuellerstorfi	25.5	13.522	0.058	4.133						0.122	13.4963	0.828849	0.912491		P1-92-AR40	700	K. hunti	4	6.4562	13.1141	13.1141	0.617102	11.2871	-0.184966
B17	2217	C.wuellerstorfi	12.5	13.58	0.053	4.291						0.158	13.5783	0.994063	0.882662		P1-94-AR-B8	1031	hunti	6.5	6.835	10.0467	10.0467	-0.729511	11.2396	-0.205815
B16	1533	C.wuellerstorfi	13.5	13.633	0.065	4.116						0.188	13.637	0.825075	0.868877		HLY0503-18TC	2654	hunti	9.5	6.87778	11.8052	11.8052	0.0424803	11.7474	0.0170998
HLY-18TC	2598	C.wuellerstorfi	26.5	13.698	0.078	4.07		hunti	14.3552	14.3552	1.16194	0.23	13.7023	0.787492	0.789893		PS2185-3 GKG	1051	hunti	5.5	6.94444	11.2709	11.2709	-0.192073	11.2282	-0.210823
B17	2217	C.wuellerstorfi	13.5	13.776	0.196	4.03						0.278	13.8153	0.757111	0.779187		PS-2179-3	1228	hunti	6.5	6.97078	12.5	12.5	0.3475	11.3056	-0.176851
B17	2217	C.wuellerstorfi	14.5	13.972	0.738	4.043						0.392	14.1527	0.792957	0.758959		PS-2179-3	1228	min	6.5	6.97078	13.66	10.5182	-0.52251	12.2709	0.246943
B8	1031	C.wuellerstorfi	21.5	14.71	1.157	3.951	0.178191					0.521	14.8497	0.726808	0.770136		PS-2206-4	2993	hunti	4.5	7.07547	10.4336	10.4336	-0.559652	12.3691	0.290048
B16	1533	C.wuellerstorfi	14.5	15.867	0.084	3.94	0.132936					0.894429	15.5093	0.790643	0.786927		PS-2186-3	2004	min	8.5	7.17905	21.6	16.632	2.16145	12.0319	0.142013
B17	2217	C.wuellerstorfi	15.5	15.951	1.14005	3.992						0.897857	16.303	0.843331	0.831137		HLY0503-18TC	2654	hunti	10.5	7.30409	11.7619	11.7619	0.0234554	11.617	-0.0401154
P9	1400	C. wuellerstorfi	17.75	17.091	2.62095	3.81102		K. hunti	11.0372	11.0372	-0.294679	1.88133	17.5847	0.859436	0.865236		P1-94-AR-B8	1031	hunti	7.5	7.31051	10.8139	10.8139	-0.392678	11.7218	0.00584826
B17	2217	C.wuellerstorfi	16.5	19.712	2.194	3.992						1.14542	19.5697	0.892942	0.911218		P1-94-AR-B8	1031	min	7.5	7.31051	10.966	8.44385	-1.43315	10.3012	-0.617785
HLY-18TC	2598	C.wuellerstorfi	28.5	21.906	0.56875	3.925						1.92055	21.3642	0.981277	0.885585		PS-2179-3	1228	min	7.5	7.70124	14.23	10.9571	-0.329833	10.1219	-0.696469
P21	1470	O. tener	2.5	22.4748	0.99925	3.67222						2.19018	22.6182	0.782536	0.959079		HLY0503-18TC	2654	hunti	11.5	7.7304	9.52911	9.52911	-0.956719	10.6741	-0.454075
B17	2217	C.wuellerstorfi	17.5	23.474	1.32615	4.015						2.13086	23.583	1.11342	0.834346		P1-94-AR-B8	1031	hunti	8.5	7.78602	10.8657	10.8657	-0.369966	11.6442	-0.028183
P9	1400	O.tener	28.25	24.8001	2.52185	3.82546		K. hunti	10.5193	10.5193	-0.522012	0.55	25.1987	0.607078	0.9342		PS-2163-1	3040	hunti	4.5	7.82609	13.5747	13.5747	0.819294	12.2481	0.236918
HLY-18TC	2598	C.wuellerstorfi	29.5	27.322	1.424	4.262		hunti	13.6504	13.6504	0.852546	0.742	26.9561	1.0821	0.801747		PS-2184-3	1674	hunti	0.5	7.96421	13.2946	13.2946	0.696309	13.6456	0.85041
B16	1533	C.wuellerstorfi	17.5	28.746	0.02575	3.962						0.4125	28.2799	0.716065	0.795345		PS-2184-3	1674	min	0.5	7.96421	18.1513	13.9765	0.99567	13.95	0.984057
P15	2627	C. wuellerstorfi	20.5	28.7718	1.52825	3.83						0.4315	29.2726	0.587873	0.774182		PS-2186-3	2004	min	9.5	8.02365	21.45	16.5165	2.11074	13.6679	0.860202
HLY-18TC	2598	C.wuellerstorfi	30.5	30.3	0.697	4.076		hunti	12.9124	12.9124	0.528533	1.35333	30.0229	1.01861	0.87011		PS2185-4	1051	v	6.5	8.20707	12.3879	12.3879	0.298266	13.1491	0.632459
B17	2217	C.wuellerstorfi	19.5	30.997	0.58175	4.007						1.624	30.9586	1.00385	0.971032		PS2185-4	1051	min	6.5	8.20707	15.7975	12.1641	0.200021	12.5422	0.366006
P15	2627	C. wuellerstorfi	22.5	31.5787	1.82625	3.9						1.593	31.9936	0.890637	0.917032		P1-94-AR-B8	1031	hunti	9.5	8.26153	10.7007	10.7007	-0.442408	14.7897	1.35267
B16	1533	C.wuellerstorfi	18.5	33.405	0.172	4.18						0.026	32.8536	0.85661	0.928565		PS-2179-3	1228	min	8.5	8.4317	14.21	10.9417	-0.336594	14.5574	1.25071
B17	2217	C.wuellerstorfi	20.5	33.577	1.4	4.324						0.2148	33.9863	1.03845	0.974096		P1-92-AR-PC30	765	K. hunti	2	8.4989	27.7541	27.7541	7.04405	14.2454	1.11374
B17	2217	C.wuellerstorfi	21.5	34.977	1.08025	4.058						1.48618	34.8704	1.02723	0.921667		PS-2206-4	2993	hunti	5.5	8.6478	11.2266	11.2266	-0.211503	14.527	1.23735
P21	1470	C. wuellerstorfi	17.5	36.0572	0.31975	3.78215						1.2264	35.8038	0.699326	0.902611		P1-94-AR-B8	1031	hunti	10.5	8.73704	10.604	10.604	-0.484836	14.7119	1.31853
B17	2217	C.wuellerstorfi	22.5	36.377	0.53745	4.071						1.192	36.4496	0.981277	0.909177		PS2163-2 GKG	3047	hunti	10.5	8.73704	12.1085	12.1085	0.175616	12.9002	0.523194
P9	1400	C. wuellerstorfi	44.75	36.9144	0.54045	4.04507		K. hunti	15.2705	15.2705	1.56375	1.649	36.9154	1.04693	0.93111		P1-94-AR-B28	1990	min	9.5	8.82654	15.4108	11.8663	0.0693226	13.6421	0.84889
P30	765	C. teretis	49.5	37.4549	0.3221	3.83296						1.30125	37.3821	0.765126	0.816494		PS-2186-3	2004	min	10.5	8.86824	24.28	18.6956	3.06737	13.6477	0.851354
B17	2217	C.wuellerstorfi	23.5	37.777	0.09125	3.752						1.068	37.7	0.637427	0.365853		PS2179-1-GKG	1230	hunti	9.5	9.16216	14.9362	14.9362	1.41698	13.4355	0.758206
P21	1470	O. tener	19.5	37.8682	0.1475	2.79876						1.122	37.887	-0.304995	0.464925		P1-94-AR-B8	1031	hunti	11.5	9.21255	10.6321	10.6321	-0.472513	13.0998	0.610824
P9	1400	C. wuellerstorfi	46.25	38.0157	0.04925	4.12982						1.303	37.983	1.06234	0.597824		P1-94-AR-B8	1031	min	11.5	9.21255	14.3475	11.0476	-0.290123	11.6228	-0.0375723
B16	1533	C.wuellerstorfi	19.5	38.065	0.70875	4.052						1.5605	38.2848	1.03612	0.727577		HLY0503-18TC	2654	hunti	15.5	9.43565	10.1877	10.1877	-0.667588	10.8681	-0.368914
P21	1470	O. tener	20.5	38.7737	0.40325	3.2144						0.990333	38.6719	0.0842628	0.690617		PS-2163-1	3040	hunti	5.5	9.56522	11.3107	11.3107	-0.174615	10.6882	-0.447901
B17	2217	C.wuellerstorfi	24.5	39.177	0.82275	4.027						1.2628	39.3168	0.951465	0.528935		P1-94-AR-B8	1031	hunti	12.5	9.68806	11.1623	11.1623	-0.239734	11.1967	-0.224631
P15	2627	O.tener	28.5	39.9997	0.12525	3.54						1.695	39.7672	0.551078	0.781755		P1-94-AR-B8	1031	min	12.5	9.68806	12.6396	9.73247	-0.867446	11.6679	-0.017811
B17	2217	C.wuellerstorfi	25.5	40.125	0.482	3.81		hunti	18.4344	18.4344	2.95268	1.803	40.2439	0.842721	0.829651		PS-2186-3	2004	min	11.5	9.71284	17.65	13.5905	0.82623	11.6068	-0.0446273
B16	1533	C.wuellerstorfi	20.5	40.607	0.014	4.346						0.388	40.451	1.09516	0.836874		P1-94-AR-B28	1990	hunti	10.5	9.75564	12.5433	12.5433	0.366511	11.5212	-0.0821719
B17	2217	C.wuellerstorfi	26.5	40.621	0.409	3.828		hunti	14.6831	14.6831	1.30589	0.366	40.7527	0.572746	0.870893		P1-94-AR-B28	1990	min	10.5	9.75564	14.2925	11.0052	-0.308696	11.7498	0.0181644
B16	1533	C.wuellerstorfi	21.5	41.03	0.087	4.184						0.446	40.9227	0.944778	0.705994		P1-94-AR-B8	1031	hunti	13.5	10.1636	10.7347	10.7347	-0.427457	12.5629	0.375124
B17	2217	C.wuellerstorfi	27.5	41.117	0.033	3.8						0.644	41.099	0.600458	0.824973		HLY0503-18TC	2654	hunti	17.5	10.2883	10.8753	10.8753	-0.365765	12.4659	0.332532
B8	1031	C.wuellerstorfi	32.5	41.15	0.304	4.116						0.71	41.2403	0.929684	0.808697		PS-2186-3	2004	min	12.5	10.5574	22.93	17.6561	2.61103	12.48	0.338727
B16	1533	C.wuellerstorfi	22.5	41.454	0.03625	3.95						1.37	41.3647	0.895948	0.768807		PS-2179-3	1228	min	11.5	10.6231	15.66	12.0582	0.15355	12.7909	0.475222
P21	1470	O. tener	23.5	41.4902	0.02975	3.51721						1.458	41.4881	0.480789	0.834307		P1-94-AR-B8	1031	hunti	14.5	10.6391	11.0758	11.0758	-0.27772	13.2703	0.685641
B8	1031	C.wuellerstorfi	33.5	41.52	0.093	4.162		hunti	12.523	12.523	0.357612	1.461	41.5411	1.12618	0.761008		P1-94-AR-B28	1990	hunti	11.5	10.6848	12.2893	12.2893	0.255018	12.8812	0.514844
B17	2217	C.wuellerstorfi	28.5	41.613	0.177	3.729						1.3755	41.641	0.67605	0.953514		HLY0503-18TC	2654	hunti	18.5	10.7146	13.2718	13.2718	0.686328	12.7013	0.435883
B8	1031	C.wuellerstorfi	34.5	41.79	0.27	4.132	0.00707107					1.272	41.821	1.05831	0.999755		PS-2184-3	1674	hunti	2.5	10.9097	15.7108	15.7108	1.75704	12.4046	0.305623
B16	1533	C.wuellerstorfi	23.5	42.06	0.01	4.29						1.5145	41.9733	1.26491	1.16909		PS-2184-3	1674	min	2.5	10.9097	14.492	11.1589	-0.241253	12.5101	0.351925
B8	1031	C.wuellerstorfi	35.5	42.07	0.039	4.215		hunti	16.9121	16.9121	2.28441	1.48525	42.0797	1.18404	1.05885		P1-94-AR-B8	1031	hunti	15.5	11.1146	9.5922	9.5922	-0.929024	12.0174	0.135629
B17	2217	C.wuellerstorfi	29.5	42.109	0.414	3.782		hunti	16.8867	16.8867	2.27326	1.36825	42.234	0.727597	0.895103		PS2163-2 GKG	3047	hunti	15.5	11.1146	12.8167	12.8167	0.486531	12.3818	0.295608
B17	2217	C.wuellerstorfi	30.5	42.523	0.324	3.768		hunti	16.7113	16.7113	2.19626	1.668	42.493	0.773667	0.853535		HLY0503-18TC	2654	hunti	19.5	11.1409	10.8083	10.8083	-0.395154	12.5951	0.389266
B16	1533	C.wuellerstorfi	24.5	42.847	0.009	4.14	0.301227					1.23722	42.742	1.05934	0.890084		PS-2186-3	2004	min	13.5	11.402	22.77	17.5329	2.55694	13.2962	0.697021
B17	2217	C.wuellerstorfi	31.5	42.856	0.05	3.921		hunti	16.9363	16.9363	2.29505	1.22178	42.8697	0.837244	0.735663		PS-2206-4	2993	hunti	7.5	11.7925	12.2256	12.2256	0.227035	13.9179	0.969955
P39	1470	O.tener	48	42.906	0.282	3.39742						1.2055	42.9833	0.310406	0.626026		P1-92-AR40	700	K. hunti	11	11.828	13.0974	13.0974	0.609753	14.4283	1.19401
B17	2217	C.wuellerstorfi	32.5	43.188	0.333	3.782		hunti	18.7117	18.7117	3.07445	1.38237	43.205	0.730428	0.678068		PS-2184-3	1674	hunti	3.5	12.3825	15.9253	15.9253	1.8512	13.1684	0.64091
B17	2217	C.wuellerstorfi	33.5	43.521	0.113	3.936		hunti	19.1282	19.1282	3.25726	1.926	43.4477	0.99337	0.847337		PS-2184-3	1674	min	3.5	12.3825	17.3509	13.3602	0.725124	12.7289	0.447968
B16	1533	C.wuellerstorfi	25.5	43.634	0.219	3.84						1.531	43.6693	0.818212	0.878512		P1-94-AR-B28	1990	hunti	13.5	12.543	11.2334	11.2334	-0.208559	12.4711	0.334823
B17	2217	C.wuellerstorfi	34.5	43.853	0.2078	3.876		hunti	18.7537	18.7537	3.09287	1.38	43.8493	0.823952	0.487385		PS2185-4	1051	min	9.5	12.8077	13.0235	10.0281	-0.737676	11.7189	0.00458756
P40	700	C. teretis	53	44.0608	0.1242	2.90771		K. hunti	11.7388	11.7388	0.0133451	1.202	44.0329	-0.180009	0.711153		PS-2163-1	3040	hunti	7.5	13.0435	11.8087	11.8087	0.0440288	11.9179	0.0919516
B17	2217	C.wuellerstorfi	35.5	44.185	0.185	4.61		hunti	18.7508	18.7508	3.09161	1.0385	44.2053	1.48952	0.713769		P1-94-AR-B28	1990	min	14.5	13.4721	15.7975	12.1641	0.20002	11.9534	0.107546
B16	1533	C.wuellerstorfi	26.5	44.37	0.147	3.884						1.37925	44.3573	0.831802	1.06119		HLY0503-18TC	2654	hunti	26.5	14.1251	14.3552	14.3552	1.16194	12.7773	0.469235
B17	2217	C.wuellerstorfi	36.5	44.517	0.536	3.958		hunti	18.4175	18.4175	2.94529	1.162	44.6467	0.862265	0.815787		P1-94-AR-B28	1990	min	15.5	14.4012	14.8194	11.411	-0.130589	12.8336	0.493931
B16	1533	C.wuellerstorfi	27.5	45.053	0.683	3.884						0.9875	45.102	0.753295	0.849431		Pl-94AR-BC26B	1020	min	5.5	14.7801	18.3734	14.1475	1.07077	12.5302	0.36077
B16	1533	C.wuellerstorfi	28.5	45.736	0.668	3.994						1.334	45.731	0.932734	0.879744		PS-2163-1	3040	hunti	8.5	14.7826	12.09	12.09	0.16751	13.3139	0.704811
B16	1533	C.wuellerstorfi	29.5	46.404	0.653	3.879						2.01	46.399	0.953204	0.615138		PS2185-4	1051	min	10.5	15.1584	13.8278	10.6474	-0.465785	13.125	0.621857
B16	1533	C.wuellerstorfi	30.5	47.057	0.586	2.8985	0.30052					1.944	47.0347	-0.0405224	0.499482		PS-2184-3	1674	hunti	5.5	15.328	18.2737	18.2737	2.88215	12.8263	0.490734
P39	1470	C. teretis	54	47.643	0.067	3.67233		K. hunti	11.8	11.8	0.0402	1.20775	47.47	0.585764	0.424462		PS-2184-3	1674	min	5.5	15.328	13.5924	10.4662	-0.54536	12.986	0.560866
B16	1533	C.wuellerstorfi	31.5	47.71	0.606	3.8155	0.000707107					1.20381	47.8897	0.728144	0.689892		P1-94-AR-B28	1990	min	16.5	15.3303	16.4339	12.6541	0.415158	15.273	1.56485
B16	1533	C.wuellerstorfi	32.5	48.316	0.559	3.85						1.1695	48.3003	0.755768	0.709847		PS2179-1-GKG	1230	min	15.5	16.694	16.7387	12.8888	0.518172	13.8257	0.929487
B16	1533	C.wuellerstorfi	33.5	48.875	0.5576	3.759						1.074	48.8745	0.64563	0.580095		PS-2184-3	1674	hunti	6.5	16.8007	22.0823	22.0823	4.55415	15.4327	1.63496
P40	700	C. teretis	60	49.4326	0.20715	3.49514		K. hunti	12.1381	12.1381	0.188641	0.86	49.3158	0.338887	0.423313		P1-94-AR-PC9	1035	K. hunti	17.75	17.091	11.0372	11.0372	-0.294679	16.0092	1.88805
P21	1470	O. tener	32.5	49.6397	0.1845	3.42765						0.93	49.6322	0.285422	0.497908		PS2185-4	1051	min	11.5	17.5092	24.0275	18.5012	2.98202	15.7855	1.78983
P15	2627	C. wuellerstorfi	35.5	49.8242	1.6265	3.99						1.038	50.3049	0.869415	0.66931		PS2185-4	1051	min	12.5	19.8599	20.1774	15.5366	1.68058	14.189	1.08898
P21	1470	C. wuellerstorfi	34.5	51.4507	1.811	3.79457						1.93176	51.5123	0.853094	0.917136		P1-94-AR-PC9	1035	K. hunti	22.25	20.395	11.7701	11.7701	0.0270757	14.9816	1.43691
P21	1470	C. teretis	36.5	53.2617	0.69725	3.78168						2.87333	52.8905	1.0289	0.929426		PS-2163-1	3040	hunti	9.5	20.6667	14.1	14.1	1.0499	14.2089	1.0977
P39	1470	C. teretis	62	53.959	0.8454	3.56555						3.34	54.0084	0.906284	1.036		PS-2179-3	1228	hunti	19.5	21.1286	15	15	1.445	14.3116	1.14278
P40	700	C. teretis	67	54.8044	0.63385	3.71986		K. hunti	12.2039	12.2039	0.217521	3.9	54.7339	1.17282	1.00117		PS-2179-3	1228	min	20.5	22.2373	19.01	14.6377	1.28595	16.7102	2.19577
P15	2627	O.tener	39.5	55.4382	5.614	3.48						3.85733	57.0983	0.92441	1.0977		PS-2179-3	1228	hunti	21.5	23.3459	16.05	16.05	1.90595	16.6342	2.1624
P15	2627	C. wuellerstorfi	43.5	61.0523	2.807	3.83						3.46538	60.1166	1.19586	0.940998		PS-2184-3	1674	hunti	7.5	23.9577	23.7632	23.7632	5.29203	16.3473	2.03646
P15	2627	O.tener	45.5	63.8592	2.807	3.37						3.3	63.8592	0.70272	0.960029		PS-2179-3	1228	hunti	22.5	24.4545	13.72	13.72	0.88308	15.5236	1.67487
P15	2627	C. wuellerstorfi	47.5	66.6663	0	3.8						2.54543	65.7306	0.981505	0.878577		PS-2163-1	3040	hunti	12.5	24.6667	13.5656	13.5656	0.815296	14.9734	1.43333
P15	2627	O.tener	47.5	66.6663	2.807	3.77						2.54543	67.6019	0.951505	0.885313		P1-94-AR-PC9	1035	K. hunti	28.25	24.8001	10.5193	10.5193	-0.522012	12.9509	0.545434
P15	2627	O.tener	49.5	69.4732	1.85475	3.7						1.75413	69.1558	0.722928	0.605301		PS-2179-3	1228	min	23.5	25.5632	17.2714	13.299	0.698259	12.7893	0.474525
P39	1470	C. teretis	84	71.328	0	3.25608						1.06781	70.7097	0.141469	0.387093		HLY0503-18TC	2654	hunti	29.5	26.9794	13.6504	13.6504	0.852546	12.7777	0.469409
P39	1470	O.tener	84	71.328	0.95225	3.41149						1.06781	71.6454	0.296882	0.382935		HLY0503-18TC	2654	hunti	30.5	27.4465	12.9124	12.9124	0.528533	13.5452	0.80636
P15	2627	O.tener	51.5	72.2802	1.808	3.95						0.444375	72.5655	0.710453	0.49633		PS2179-1-GKG	1230	hunti	25.5	27.7805	13.5073	13.5073	0.78972	13.4651	0.771167
P21	1470	C. teretis	59.5	74.0882	2.76625	3.73032		K. hunti	11.7716	11.7716	0.027733	0.398889	74.4077	0.481655	0.52669		HLY0503-18TC	2654	hunti	31.5	27.9137	14.357	14.357	1.16274	13.7626	0.901791
P39	1470	O.tener	91	76.8545	0	3.54577						0.852273	75.9324	0.387963	0.445467		P1-94-AR-B28	1990	min	19.5	28.1119	16.7509	12.8982	0.522295	13.7062	0.877036
P39	1470	C. teretis	91	76.8545	0.9463	3.62459						0.852273	77.1699	0.466782	0.49814		PS-2186-3	2004	min	15.5	28.3154	19.66	15.1382	1.50567	12.9221	0.532787
P21	1470	O. tener	63.6	77.8008	1.72045	3.78883						0.895455	78.0589	0.639676	0.552142		HLY0503-18TC	2654	hunti	32.5	28.3808	12.6304	12.6304	0.404756	12.5282	0.359893
P21	1470	O. tener	65.5	79.5212	2.85975	3.68124						0.984651	79.901	0.549969	0.700595		P1-94-AR-B8	1031	hunti	20.5	28.6176	9.58651	9.58651	-0.931524	12.3318	0.273662
P39	1470	C. teretis	98	82.381	2.53075	4.0834						0.785116	82.2713	0.912139	0.724429		PS2185-4	1051	hunti	14.5	28.9787	12.3879	12.3879	0.298266	12.9047	0.525156
P15	2627	O.tener	60.5	84.9117	2.22555	3.91						0.6476	84.81	0.711179	0.862421		PS2185-4	1051	min	14.5	28.9787	15.4754	11.916	0.0911404	13.4699	0.773271
P30	765	C. teretis	131	87.1373	0.58145	4.18064						0.5584	86.5893	0.963944	0.764592		PS-2186-3	2004	min	16.5	29.8102	23.38	18.0026	2.76314	14.0042	1.00786
P15	2627	C. wuellerstorfi	62.5	87.7188	0.85125	3.84						0.5352	87.8087	0.618654	0.759742		PS2186-5 GKG	2036	hunti	16.5	29.8102	15.4563	15.4563	1.64533	14.6859	1.30711
P40	700	C. teretis	111	88.57	1.6153	3.92479		K. hunti	14.9024	14.9024	1.40214	0.5012	88.8247	0.696629	0.429825		PS-2186-3	2004	min	17.5	31.3049	15.92	12.2584	0.241438	15.6782	1.74274
P30	765	C. teretis	136	90.1853	0.34045	3.21936		K. hunti	10.6255	10.6255	-0.475411	0.416316	89.7604	-0.0258092	0.366959		HLY0503-18TC	2654	hunti	39.5	31.6509	15.7961	15.7961	1.79451	15.2037	1.53443
P15	2726	O.tener	64.5	90.5258	0.34645	3.68						0.3925	90.5278	0.430057	0.277889		HLY0503-18TC	2654	hunti	41.5	32.5853	16.8776	16.8776	2.26929	14.8067	1.36014
P40	700	C. teretis	114	90.8722	0.5323	3.6964		K. hunti	13.9865	13.9865	1.00006	0.3075	90.9342	0.429419	0.407848		PS-2186-3	2004	hunti	18.5	32.7997	15.63	15.63	1.72157	14.9137	1.40713
P30	765	C. teretis	138	91.4045	0.6096	3.62344						0.345455	91.4303	0.364067	0.421722		PS-2186-3	2004	min	18.5	32.7997	17.4952	13.4713	0.773896	13.8453	0.938083
P30	765	C. teretis	139	92.0141	1.31865	3.71678		K. hunti	12.0519	12.0519	0.150766	0.416667	92.2505	0.471679	0.563196		HLY0503-18TC	2654	hunti	42.5	33.0524	12.7936	12.7936	0.476411	12.6772	0.425277
P15	2726	C. wuellerstorfi	66.5	93.3328	0.89075	3.87						1.55909	93.1901	0.853842	0.883098		P1-94-AR-B8	1031	hunti	24.5	33.3235	10.4539	10.4539	-0.55075	11.6849	-0.0103111
P39	1470	C. teretis	113	94.2235	0.229	4.25886						1.96364	94.0029	1.32377	0.980243		P1-93-AR-21	1470	K. hunti	14.5	33.3507	11.037	11.037	-0.294743	11.7272	0.00822187
P30	765	C. teretis	143	94.4525	4.2672	3.6834						2.0375	95.7986	0.763114	0.860178		HLY0503-18TC	2654	hunti	43.5	33.5196	10.6689	10.6689	-0.45637	12.0968	0.170497
P30	765	C. teretis	150	98.7197	0.6096	3.63814						0.91871	97.5005	0.493648	0.676682		HLY0503-18TC	2654	hunti	44.5	33.9867	13.6824	13.6824	0.866561	12.7257	0.446569
P30	765	C. teretis	151	99.3293	1.2102	3.92704		K. minima	15.9838	12.3075	0.263005	0.8725	99.5295	0.773285	0.553422		PS-2186-3	2004	hunti	19.5	34.2945	14.6419	14.6419	1.28779	13.4233	0.752843
P39	1470	C. teretis	121	100.54	1.35165	3.655						0.334	100.587	0.393332	0.567249		PS-2186-3	2004	min	19.5	34.2945	17.66	13.5982	0.82961	14.0768	1.03972
P9	1400	C. wuellerstorfi	133.25	101.891	1.1013	3.80356		K. hunti	11.484	11.484	-0.0985321	0.30025	101.808	0.535129	0.523978		HLY0503-18TC	2654	hunti	45.5	34.4539	14.5254	14.5254	1.23663	14.378	1.17196
P9	1400	C. wuellerstorfi	134.75	102.992	0.7342	3.91235		K. hunti	12.1705	12.1705	0.202866	0.298	102.87	0.643473	0.668145		Pl-94AR-BC19B	2400	hunti	12.5	34.6462	13.9363	13.9363	0.978031	15.1193	1.49736
P9	1400	C. wuellerstorfi	135.75	103.727	0.3671	3.93099		K. hunti	12.2152	12.2152	0.222458	1.115	103.604	0.825834	0.787846		P1-94-AR-B8	1031	hunti	26.5	35.6765	15.1885	15.1885	1.52776	15.0496	1.46679
P9	1400	C. wuellerstorfi	136.25	104.094	0.39325	3.96331		K. hunti	12.1549	12.1549	0.196004	1.295	104.102	0.894232	1.01697		PS2184-1-GKG	1640	hunti	10.5	35.7132	18.348	18.348	2.91479	15.0025	1.44609
P39	1470	C. teretis	126	104.487	1.80935	4.39892		K. hunti	21.2	21.2	4.1668	1.3	104.959	1.33084	1.02131		PS-2186-3	2004	hunti	20.5	35.7892	13.2499	13.2499	0.676719	14.9405	1.41887
P9	1400	C. wuellerstorfi	139.25	106.296	1.65195	3.86687		K. hunti	12.7325	12.7325	0.449572	1.5	106.244	0.838866	0.98182		PS-2186-3	2004	min	20.5	35.7892	18.5579	14.2896	1.13314	14.7861	1.35108
P9	1400	C. wuellerstorfi	141.5	107.948	0.54895	3.89561						1.04167	107.581	0.775756	0.758453		HLY0503-18TC	2654	hunti	49.5	36.3225	13.6263	13.6263	0.841929	14.1706	1.08088
P21	1470	C. wuellerstorfi	97.5	108.497	1.103	3.74886		K. hunti	17.87	17.87	2.70493	1.2	108.682	0.660737	0.765095		HLY0503-18TC	2654	hunti	50.5	36.7897	14.4165	14.4165	1.18884	15.7726	1.78418
P9	1400	C. wuellerstorfi	143.75	109.6	0.70185	3.92687		K. hunti	13.4708	13.4708	0.773679	1.3	109.467	0.858791	0.601536		P1-94-AR-PC9	1035	K. hunti	44.75	36.9144	15.2705	15.2705	1.56375	15.4495	1.64232
P30	765	C. teretis	169	110.302	0.03235	3.45336						0.8	110.079	0.285078	0.644707		HLY0503-6JPC	800	K. hunti	0.5	37	21.2602	21.2602	4.19324	15.6409	1.72635
P9	1400	C. wuellerstorfi	144.75	110.334	1.2438	3.96605		K. hunti	14.3386	14.3386	1.15463	0.7625	110.738	0.790251	0.525767		HLY0503-18TC	2654	hunti	51.5	37.2568	12.6739	12.6739	0.423863	15.3207	1.58578
P15	2726	C. wuellerstorfi	79.5	111.578	0.01375	3.83						0.00285714	111.168	0.501973	0.563033		PS-2186-3	2004	hunti	21.5	37.284	14.5832	14.5832	1.26205	14.7946	1.35483
P40	700	C. teretis	141	111.592	0.21085	3.72519		K. hunti	12.9327	12.9327	0.537462	0.00142857	111.658	0.396876	0.530008		HLY0503-18TC	2654	hunti	52.5	37.724	12.8156	12.8156	0.486027	14.0319	1.02
P9	1400	C. wuellerstorfi	146.75	111.803	2.09135	3.89954		K. hunti	12.6072	12.6072	0.394545	0.6	112.43	0.691176	0.602345		PS-2163-1	3040	hunti	22.5	38	12.64	12.64	0.40896	14.452	1.20442
P40	700	C. teretis	144	113.894	1.2847	3.82714		K. hunti	19.1205	19.1205	3.25391	1.1	113.625	0.718984	0.710998		P1-92-AR-PC30	765	K. hunti	50.5	38.0645	17.4468	17.4468	2.51913	15.7305	1.7657
P30	765	C. teretis	177	115.179	1.02915	3.79049						1.30211	115.094	0.722834	0.757667		P1-92-AR-PC30	765	K. minima	50.5	38.0645	19.1875	14.7744	1.34594	15.4827	1.65689
P9	1400	C. teretis	152.75	116.208	0.75575	3.90007		K. minima	15.1548	11.6692	-0.0172277	1.296	116.117	0.831184	0.720755		PS2185-3 GKG	1051	hunti	16.5	38.1529	20.976	20.976	4.06847	15.4451	1.6404
P40	700	C. teretis	148	116.964	4.9207	3.73725						0.996	118.352	0.608248	0.652872		HLY0503-18TC	2654	hunti	53.5	38.1912	11.5762	11.5762	-0.0580668	14.8087	1.36101
P30	765	C. teretis	188	121.885	0.19525	3.69503						0.762222	120.309	0.519183	0.507242		HLY0503-18TC	2654	hunti	54.5	38.6583	12.4522	12.4522	0.326523	14.2174	1.10142
P21	1470	C. teretis	112.5	122.08	0.25585	3.56124						0.806667	122.1	0.394293	0.535158		PS-2186-3	2004	hunti	22.5	38.7788	14.2646	14.2646	1.12217	12.5446	0.367059
P40	700	C. teretis	155	122.336	0.1585	3.84736						0.864444	122.303	0.691998	0.533264		PS2186-5 GKG	2036	hunti	22.5	38.7788	11.8178	11.8178	0.0480268	13.9162	0.969209
P30	765	C. teretis	189	122.494	1.39665	3.66219		K. hunti	12.523	12.523	0.357585	0.897778	122.907	0.5135	0.362841		PS2186-5 GKG	2036	min	22.5	38.7788	16.3791	12.6119	0.396643	15.0974	1.48775
P21	1470	C. wuellerstorfi	114.5	123.891	0	2.95271						1.292	123.425	-0.116976	0.285952		P1-94-AR-B17	2217	hunti	25.5	39	18.4344	18.4344	2.95268	14.4296	1.1946
P21	1470	C. wuellerstorfi	114.5	123.891	9.2967	3.53102						1.292	126.99	0.461333	0.332357		PS2185-4	1051	hunti	17.5	39.012	18.3582	18.3582	2.91923	14.5007	1.22581
P9	1400	C. teretis	177.75	133.187	0.8468	3.7207		K. hunti	13.9349	13.9349	0.9774	1.3005	130.371	0.652716	0.565861		HLY0503-18TC	2654	hunti	55.5	39.1255	10.9258	10.9258	-0.343566	14.4647	1.21
P15	2726	C. wuellerstorfi	95.5	134.034	0.417	3.69						1.10846	133.891	0.583536	0.565951		HLY0503-18TC	2654	hunti	56.5	39.5926	12.1733	12.1733	0.204079	15.2109	1.5376
P9	1400	C. teretis	178.75	134.451	1.8957	3.58749		K. hunti	17.482	17.482	2.5346	1.01154	134.944	0.461601	0.52899		HLY0503-18TC	2654	hunti	57	39.8262	12.4319	12.4319	0.317592	14.0336	1.02075
P9	1400	C. teretis	180.25	136.347	19.805	3.66986		K. hunti	12.4979	12.4979	0.346571	1.00086	142.317	0.541832	0.407075		PS2185-4	1051	hunti	18.5	39.8711	22.1656	22.1656	4.59068	15.1753	1.52196
P40	700	C. teretis	180	156.152	0.1844	3.27741		K. hunti	11.9465	11.9465	0.10451	1.34224	149.612	0.217791	0.48229		HLY0503-18TC	2654	hunti	57.5	40.0598	12.4714	12.4714	0.334964	15.9595	1.8662
P39	1470	C. teretis	156	156.336	2.42995	3.74621						1.34552	157.085	0.687248	0.360534		PS-2186-3	2004	hunti	23.5	40.2735	16.6343	16.6343	2.16247	16.4097	2.06386
P40	700	C. teretis	181.5	158.766	0.87145	3.22713						1.38741	158.247	0.176564	0.343884		PS2186-5 GKG	2036	hunti	23.5	40.2735	16.0941	16.0941	1.92532	14.2923	1.1343
P40	700	C. teretis	182	159.638	9.7955	3.22189		K. hunti	12.4036	12.4036	0.305198	1.37	162.612	0.16784	0.267267		P1-94-AR-B17	2217	hunti	26.5	40.3453	14.6831	14.6831	1.30589	14.176	1.08325
P30	765	C. teretis	266	169.433	0.6619	3.48132						1.52036	166.389	0.457398	0.318133		HLY0503-18TC	2654	hunti	58.5	40.527	11.5783	11.5783	-0.0571466	13.1472	0.631636
P40	700	C. teretis	188	170.095	1.7765	3.35916		K. hunti	13.499	13.499	0.78608	1.49	170.467	0.32916	0.464292		PS-2163-1	3040	hunti	24.5	40.6667	11.89	11.89	0.07971	12.1324	0.186113
P30	765	C. teretis	270	171.872	1.2192	3.67179						1.313	171.686	0.606318	0.275617		HLY0503-18TC	2654	hunti	59.5	40.9941	11.4907	11.4907	-0.0955911	12.5731	0.379586
P30	765	C. teretis	272	173.091	1.2192	3.00709						1.06227	173.091	-0.108626	0.195416		HLY0503-18TC	2654	hunti	60.5	41.4613	11.0198	11.0198	-0.302298	15.0794	1.47987
P30	765	C. teretis	274	174.31	5.1953	3.26448						0.761875	175.635	0.0885558	0.266934		P1-94-AR-B17	2217	hunti	29.5	41.7154	16.8867	16.8867	2.27326	14.6564	1.29416
P39	1470	C. teretis	166	179.505	5.7775	4.06192						0.436875	179.699	0.820871	0.402155		PS-2186-3	2004	hunti	24.5	41.7683	24.11	24.11	5.44429	14.6112	1.27433
P30	765	C. teretis	292	185.283	3.6576	3.59344						0.16069	184.576	0.297037	0.301384		HLY0503-18TC	2654	hunti	61.5	41.9284	9.7748	9.7748	-0.848862	15.7495	1.77404
P30	765	C. teretis	298	188.941	2.4384	3.08793						0.134286	188.534	-0.213758	0.140311		PS-2163-1	3040	hunti	25.5	42	11.2648	11.2648	-0.194736	15.5521	1.68737
P30	765	C. teretis	302	191.379	1.8288	3.51862						0.736667	191.176	0.337652	0.213239		P1-94-AR-B17	2217	hunti	30.5	42.1721	16.7113	16.7113	2.19626	13.1423	0.629448
P30	765	C. teretis	305	193.208	1.17705	3.65497						0.945385	192.99	0.515823	0.149748		Pl-94AR-BC19B	2400	hunti	15.5	42.2489	15.8995	15.8995	1.83988	15.303	1.57802
P15	2726	C. wuellerstorfi	138.5	194.385	2.807	2.74						0.92	194.928	-0.404232	-0.106131		HLY0503-18TC	2654	hunti	62.5	42.3956	12.0608	12.0608	0.154694	16.1161	1.93497
P15	2726	C. wuellerstorfi	140.5	197.192	0.84885	2.71						0.9412	196.539	-0.429984	-0.129602		PS2185-4	1051	hunti	21.5	42.4485	20.5786	20.5786	3.89402	15.2155	1.5396
P39	1470	C. teretis	174	198.041	1.2631	3.60583						0.8392	198.179	0.445408	-0.0801779		Pl-94AR-BC20A	3110	hunti	24.5	42.5658	15.3303	15.3303	1.59	15.4229	1.63063
P30	765	C. teretis	315	199.304	0.69505	2.92091						0.757143	199.114	-0.255959	0.0593099		P1-94-AR-B28	1990	min	22.5	42.58	15.8548	12.2082	0.2194	16.3158	2.02262
P15	2726	C. wuellerstorfi	142.5	199.999	2.807	3.11						1.03333	200.703	-0.01152	-0.030942		P1-94-AR-B17	2217	hunti	31.5	42.6288	16.9363	16.9363	2.29505	14.4928	1.22234
P15	2726	C. wuellerstorfi	144.5	202.806	0.76515	3.24						1.31364	202.125	0.174653	0.131093		PS2185-4	1051	min	17.5	42.8548	21.4615	16.5253	2.11463	14.3555	1.16208
P30	765	C. teretis	322	203.571	11.7636	3.29723						1.305	207.237	0.230147	0.499686		P1-94-AR-B28	1990	min	23.5	42.95	14.8881	11.4639	-0.107368	15.6562	1.73309
P9	1400	C. wuellerstorfi	242.75	215.334	1.8957	3.88178		K. hunti	15.2858	15.2858	1.57049	2.7	212.045	1.09426	0.829929		Pl-94AR-BC19B	2400	hunti	16.5	42.9918	14.644	14.644	1.2887	15.133	1.50338
P9	1400	C. wuellerstorfi	244.25	217.23	8.2147	4.0531		K. hunti	13.1558	13.1558	0.635387	2.2	219.336	1.16538	0.77472		P1-94-AR-B17	2217	hunti	32.5	43.0855	18.7117	18.7117	3.07445	14.2134	1.09967
P9	1400	C. wuellerstorfi	250.75	225.445	3.11965	3.21276						0.9	223.746	0.0645199	0.490681		PS-2186-3	2004	hunti	25.5	43.2631	14.32	14.32	1.14648	15.9242	1.85074
P30	765	C. teretis	363	228.565	2.4384	3.46653						0.52	228.337	0.242142	0.048291		PS-2186-3	2004	min	25.5	43.2631	15.49	11.9273	0.0960847	15.4322	1.63472
P30	765	C. teretis	367	231.003	1.3795	3.1024						0.321429	230.65	-0.161788	0.250956		PS2185-4	1051	hunti	22.5	43.3076	20.0182	20.0182	3.64797	15.7178	1.76012
P40	700	C. teretis	218	232.382	1.0589	3.73208		K. hunti	18.5228	18.5228	2.99151	1.3425	232.276	0.672516	0.359135		PS-2163-1	3040	hunti	26.5	43.3333	12.1836	12.1836	0.208608	15.5219	1.67411
P30	765	C. teretis	371	233.441	2.74585	3.52139						1.86571	234.004	0.566678	0.594401		Pl-94AR-BC19B	2400	hunti	17.5	43.363	20.14	20.14	3.70144	16.9621	2.30634
P9	1400	C. teretis	259.25	236.187	0.91175	3.63614		K. hunti	11.1354	11.1354	-0.251551	1.18	235.576	0.544009	0.488757		Pl-94AR-BC20A	3110	hunti	25.5	43.3882	13.3404	13.3404	0.716439	15.5609	1.69122
P30	765	C. teretis	377	237.099	2.87965	3.62907						0.275	237.755	0.355584	0.539705		P1-94-AR-B17	2217	hunti	33.5	43.5422	19.1282	19.1282	3.25726	16.3972	2.05836
P9	1400	C. wuellerstorfi	262.25	239.979	1.8957	3.80764		K. hunti	12.6989	12.6989	0.434799	1.2	239.651	0.719523	0.516583		PS2184-1-GKG	1640	hunti	12.5	43.5843	13.0121	13.0121	0.572332	14.8738	1.38959
P9	1400	C. teretis	263.75	241.874	1.8957	3.69583		K. hunti	12.0288	12.0288	0.140657	0.536	241.874	0.474643	0.606774		Pl-94AR-BC19B	2400	hunti	18.5	43.7343	16.3652	16.3652	2.04431	15.9564	1.86488
P9	1400	C. teretis	265.25	243.77	0.64415	3.66017		K. hunti	12.6346	12.6346	0.406603	1.47	243.353	0.626155	0.636535		P1-94-AR-B8	1031	hunti	33.5	43.9118	12.523	12.523	0.357612	14.4786	1.21609
P30	765	C. teretis	389	244.414	3.1359	3.84699						1.44917	245.245	0.808807	0.709154		P1-94-AR-B17	2217	hunti	34.5	43.9989	18.7537	18.7537	3.09287	14.8928	1.39792
P40	700	C. teretis	225	247.55	24.9928	3.63442		K. hunti	15.2083	15.2083	1.53645	1.92955	254.836	0.692499	0.734058		P1-92-AR40	700	K. hunti	53	44.0588	11.7388	11.7388	0.0133451	13.7911	0.914302
P21	1470	C. teretis	171.5	272.543	5.3184	3.76978		K. hunti	13.9577	13.9577	0.987426	1.29586	265.985	0.700868	0.620739		P1-94-AR-B28	1990	hunti	26.5	44.07	15.0831	15.0831	1.48146	14.4918	1.2219
P21	1470	C. teretis	173.5	277.861	20.1977	3.73733						0.3	282.821	0.468848	0.657459		P1-92-AR-P39	1470	K. minima	49.5	44.0902	14.1	10.857	-0.373777	14.0212	1.0153
P30	765	C. teretis	477	298.059	2.92885	3.75081						1.89846	292.303	0.802661	0.848843		Pl-94AR-BC19B	2400	hunti	19.5	44.1055	16.0264	16.0264	1.8956	14.284	1.13067
P9	1400	C. wuellerstorfi	311.5	300.988	2.12975	4.35091						1.261	300.721	1.27502	0.854903		PS2185-4	1051	hunti	23.5	44.1667	16.4006	16.4006	2.05986	13.2696	0.685345
P40	700	C. teretis	255	303.118	0.686875	3.5574		K. hunti	16.5498	16.5498	2.12534	1.28857	302.637	0.487029	0.825043		Pl-94AR-BC20A	3110	hunti	26.5	44.2105	13.0528	13.0528	0.590193	14.8483	1.37842
P9	1400	C. wuellerstorfi	318.75	303.804	1.1655	3.86132		K. hunti	13.5501	13.5501	0.808495	0.9	303.964	0.713082	0.731367		P1-94-AR-B28	1990	min	27.5	44.44	13.0014	10.0111	-0.745145	14.9942	1.44246
P9	1400	C. wuellerstorfi	321.75	304.97	2.331	4.14223		K. hunti	13.4963	13.4963	0.784858	0.9	305.358	0.99399	0.885343		P1-94-AR-B17	2217	hunti	35.5	44.4556	18.7508	18.7508	3.09161	13.7813	0.909994
P9	1400	C. wuellerstorfi	327.75	307.301	0.3885	3.97696		K. hunti	14.0352	14.0352	1.02147	1.5	306.653	0.948958	0.936702		Pl-94AR-BC19B	2400	hunti	20.5	44.4767	16.7558	16.7558	2.21581	14.8542	1.38101
P9	1400	C. wuellerstorfi	328.75	307.689	0.19425	3.9147		K. hunti	17.8535	17.8535	2.69768	1.4025	307.625	0.867158	0.902167		P1-94-AR-B28	1990	hunti	28.5	44.82	10.336	10.336	-0.602497	14.8972	1.39988
P9	1400	C. wuellerstorfi	329.25	307.884	0.291375	3.86628		K. hunti	19.1003	19.1003	3.24502	1.76	307.916	0.890385	0.679232		P1-94-AR-B17	2217	hunti	36.5	44.9123	18.4175	18.4175	2.94529	14.3419	1.15611
P40	700	C. teretis	262	308.175	0.291375	3.30414		K. hunti	16.3254	16.3254	2.02687	1.52	308.175	0.280152	0.597563		P1-94-AR-B28	1990	min	29.5	45.19	13.2805	10.226	-0.650803	13.5703	0.817368
P9	1400	C. wuellerstorfi	330.75	308.466	0.58275	3.79444		K. hunti	13.318	13.318	0.706584	0.78	308.563	0.622151	0.497266		Pl-94AR-BC19B	2400	hunti	22.5	45.2192	15.9743	15.9743	1.87273	13.5622	0.813797
P9	1400	C. wuellerstorfi	332.25	309.049	3.64017	3.77113		K. hunti	13.8158	13.8158	0.925117	0.733333	310.068	0.589494	0.597986		P1-94-AR-B28	1990	hunti	30.5	45.56	12.8978	12.8978	0.522118	13.4818	0.778529
P30	765	C. teretis	501	312.689	2.4384	3.73343						0.885625	312.289	0.582313	0.508863		P1-94-AR-B28	1990	min	30.5	45.56	13.3706	10.2953	-0.620352	13.9367	0.97819
P30	765	C. teretis	505	315.128	1.0748	3.56314						0.6	314.673	0.35478	0.326759		Pl-94AR-BC19B	2400	hunti	23.5	45.5905	18.0158	18.0158	2.76895	14.5641	1.25362
P39	1470	C. teretis	225	316.202	1.3636	3.2315		K. hunti	13.6	13.6	0.8304	0.7	316.299	0.0431838	0.266096		P1-92-AR-P39	1470	K. hunti	51.5	45.6692	12.5	12.5	0.3475	14.2442	1.11321
P30	765	C. teretis	509	317.566	1.8288	3.55889						0.848462	317.721	0.400323	0.332311		P1-94-AR-B17	2217	hunti	38.5	45.8257	19.1114	19.1114	3.24989	15.5232	1.6747
P30	765	C. teretis	512	319.395	7.9248	3.69521						0.932222	321.427	0.553427	0.425709		P1-94-AR-B28	1990	hunti	31.5	45.94	11.2986	11.2986	-0.179935	14.6872	1.30768
P30	765	C. teretis	525	327.32	0.377425	3.57182						0.4	324.804	0.323376	0.501646		Pl-94AR-BC19B	2400	hunti	24.5	45.9617	16.6904	16.6904	2.1871	14.8564	1.38198
P9	1400	C. teretis	380.25	327.697	0.232175	3.88659						0.35	327.649	0.628135	0.431812		Pl-94AR-BC12A	1609	hunti	35.5	46.1351	13.8356	13.8356	0.933835	14.4166	1.18888
P30	765	C. teretis	526	327.929	0.350575	3.61241						0.3	327.969	0.343925	0.538754		PS2186-5 GKG	2036	hunti	27.5	46.2526	13.3462	13.3462	0.719001	16.0379	1.90064
P9	1400	C. teretis	381.75	328.28	1.47823	3.91268		K. hunti	13.1057	13.1057	0.613409	0.3	328.656	0.644201	0.46947		P1-94-AR-B8	1031	hunti	35.5	46.2647	16.9121	16.9121	2.28441	15.9769	1.87384
P30	765	C. teretis	529	329.758	3.96078	3.6567						0.46	330.586	0.420283	0.391506		P1-94-AR-B8	1031	min	35.5	46.2647	25.2015	19.4051	3.37886	16.1472	1.94862
P9	1400	C. teretis	395.75	333.719	0.3885	3.45667		K. hunti	11.7923	11.7923	0.0368247	-0.09	332.528	0.110035	0.187275		Pl-94AR-BC19B	2400	hunti	25.5	46.3329	16.3852	16.3852	2.05309	17.0906	2.36279
P9	1400	C. teretis	396.75	334.107	11.074	3.33907		K. hunti	10.541	10.541	-0.512522	0.105	337.669	0.0315085	0.116598		Pl-94AR-BC19B	2400	hunti	28.5	47.4466	14.6874	14.6874	1.30776	16.0682	1.91395
P30	765	C. teretis	547	345.181	15.115	3.47444						0.311429	346.528	0.20825	0.245208		PS2185-4	1051	min	18.5	47.4801	23.4589	18.0634	2.78983	15.1647	1.5173
P21	1470	C. teretis	204.5	360.296	7.1236	3.74431		K. hunti	11.7897	11.7897	0.0356867	0.4	357.633	0.495866	0.415904		P1-92-AR-P39	1470	K. hunti	54	47.643	11.8	11.8	0.0402	14.4742	1.21418
P40	700	C. teretis	344	367.42	3.5132	3.7907		K. hunti	13.5281	13.5281	0.798845	0.406667	366.217	0.543596	0.480103		Pl-94AR-BC26B	1020	hunti	15.5	48.4387	14.8875	14.8875	1.39563	15.0183	1.45301
P21	1470	C. teretis	208.5	370.933	0.5678	3.60921		K. hunti	14.3586	14.3586	1.16342	0.6	369.951	0.400848	0.428197		Pl-94AR-BC26B	1020	min	15.5	48.4387	16.7959	12.9328	0.537505	13.7056	0.876749
P39	1470	C. teretis	274	371.501	0.9765	3.54851		K. hunti	12	12	0.128	0.6	371.637	0.340148	0.252658		P1-94-AR-B8	1031	min	37.5	48.6176	22.6072	17.4075	2.50191	14.7509	1.33563
P40	700	C. teretis	351	372.478	2.95875	3.23502		K. hunti	13.7496	13.7496	0.896077	0.551667	373.138	0.0169784	0.260342		P1-92-AR-P39	1470	K. hunti	55.5	48.8272	11.5	11.5	-0.0915	14.201	1.09423
P15	2726	C. wuellerstorfi	267.5	375.436	0.81535	3.67						0.411667	374.722	0.423898	0.304202		P1-94-AR-PC9	1035	K. hunti	61.25	49.0287	17.0264	17.0264	2.33458	14.1037	1.05152
P21	1470	C. teretis	210.5	376.252	1.1049	3.7043		K. hunti	12.3172	12.3172	0.267237	0.479167	376.348	0.47173	0.491369		P1-92-AR40	700	K. hunti	60	49.4306	12.1381	12.1381	0.188641	13.6496	0.852169
P39	1470	C. teretis	281	377.356	0.1785	3.82411						0.414	377.048	0.578479	0.473591		Pl-94AR-BC19B	2400	hunti	34.5	49.6741	12.4464	12.4464	0.32399	13.8696	0.948749
P40	700	C. teretis	358	377.535	0.70825	3.61786		K. hunti	15.2139	15.2139	1.5389	0.405714	377.712	0.370565	0.493548		Pl-94AR-BC19B	2400	hunti	35.5	50.0453	15.137	15.137	1.50513	14.3746	1.17044
P15	2726	C. wuellerstorfi	269.5	378.243	2.807	3.76						0.5	378.943	0.5316	0.421255		P1-92-AR-P39	1470	K. hunti	57.5	50.4062	12.6	12.6	0.3914	15.4827	1.65691
P15	2726	C. wuellerstorfi	271.5	381.05	0.51975	3.59						0.5	380.288	0.3616	0.511159		PS2185-4	1051	min	19.5	52.1055	25.3913	19.5513	3.44303	15.4342	1.63562
P21	1470	C. teretis	212.5	381.57	0.66125	3.8827		K. hunti	13.5286	13.5286	0.799067	0.43	381.617	0.640277	0.440621		P1-94-AR-B8	1031	hunti	40.5	52.1471	17.6788	17.6788	2.62101	17.58	2.5776
P40	700	C. teretis	364.5	382.231	1.626	3.58646		K. hunti	12.4836	12.4836	0.340291	0.31	382.553	0.319986	0.400554		P1-92-AR40	700	K. hunti	67	54.8024	12.2039	12.2039	0.217521	20.6735	3.93568
P15	2726	C. wuellerstorfi	273.5	383.857	0.90275	3.57						0	383.616	0.2414	0.289875		PS2184-1-GKG	1640	hunti	16.5	59.2706	25.8657	25.8657	6.21504	19.9857	3.63371
P40	700	C. teretis	368	384.76	1.80625	3.62749		K. hunti	12.3621	12.3621	0.286962	0.0466667	385.061	0.308238	0.289866		PS2184-1-GKG	1640	hunti	17.5	63.1922	28.0679	28.0679	7.18179	19.1899	3.28437
P40	700	C. teretis	370.5	386.566	0.098	3.5684		K. hunti	12.4906	12.4906	0.343384	0.4	385.997	0.319959	0.366586		HLY0503-6JPC	800	K. hunti	3.5	63.9944	16.1121	16.1121	1.93321	19.3209	3.34189
P15	2726	C. wuellerstorfi	275.5	386.664	0.14035	3.72						0.4	386.678	0.47156	0.405274		P1-92-AR-P39	1470	K. hunti	83.5	70.9333	13.7	13.7	0.8743	16.273	2.00384
P30	765	C. teretis	583	386.805	0.0838	3.67274						0.4	386.786	0.424302	0.463957		P1-92-AR-P39	1470	K. minima	83.5	70.9333	16.7	12.859	0.505101	13.2438	0.674015
P21	1470	C. teretis	214.5	386.888	1.12285	3.74445						0.4	387.235	0.496009	0.361066		P1-92-AR-P39	1470	K. minima	85.5	72.5123	13.8	10.626	-0.475186	12.3757	0.292919
P40	700	C. teretis	372.5	388.011	1.10575	3.41133		K. hunti	11.9765	11.9765	0.117673	0.4	388.006	0.162887	0.356134		P1-93-AR-21	1470	K. hunti	58.5	73.1928	12.9217	12.9217	0.532646	12.3552	0.283938
P30	765	C. teretis	585	389.117	0.33925	3.64637						0.457778	388.861	0.409505	0.1697		P1-93-AR-21	1470	K. hunti	59.5	74.0982	11.7716	11.7716	0.027733	12.6034	0.392898
P40	700	C. teretis	374.5	389.456	0.015	3.166		K. hunti	14.0018	14.0018	1.00677	0.495556	389.348	-0.0632907	0.292382		HLY0503-6JPC	800	K. hunti	6.5	75.132	13.5977	13.5977	0.829397	13.7442	0.893725
P15	2726	C. wuellerstorfi	277.5	389.471	0.7292	3.76						0.496667	389.709	0.530932	0.25493		P1-92-AR-P39	1470	K. hunti	89.5	75.6703	14.1	14.1	1.0499	13.6222	0.840154
P9	1400	C. teretis	416.75	390.2	2.00635	3.50551		K. hunti	11.4836	11.4836	-0.0987091	0.6	390.626	0.29715	0.409131		HLY0503-6JPC	800	K. hunti	7.5	77.8823	16.3302	16.3302	2.02895	13.6703	0.861261
P21	1470	C. teretis	216.5	392.207	0.13945	3.70988		K. hunti	11.004	11.004	-0.309235	0.09	391.585	0.399312	0.286724		P1-93-AR-P23	951	K. hunti	1.5	79.277	12.3116	12.3116	0.26479	13.9312	0.975809
P40	700	C. teretis	378.5	392.346	1.39555	3.49231		K. hunti	12.6486	12.6486	0.412718	0	392.765	0.163709	0.1916		P1-92-AR-P39	1470	K. minima	99.5	83.5653	15.6	12.012	0.133268	13.2363	0.670747
P30	765	C. teretis	589	393.742	0.04945	3.34038						0	393.293	0.0117773	0.0933862		P1-92-AR40	700	K. hunti	111	88.568	14.9024	14.9024	1.40214	12.7676	0.46497
P40	700	C. teretis	380.5	393.791	2.52875	3.43327		K. hunti	12.7359	12.7359	0.451067	0	394.618	0.104672	-0.0160003		P1-92-AR-PC30	765	K. hunti	136.5	90.4901	10.6255	10.6255	-0.475411	12.7156	0.442165
P40	700	C. teretis	384	396.32	0.36125	3.088		K. hunti	11.599	11.599	-0.0480521	0.38	395.598	-0.16445	-0.0165768		P1-92-AR40	700	K. hunti	114	90.8702	13.9865	13.9865	1.00006	12.4789	0.338255
P40	700	C. teretis	384.5	396.681	1.445	3.29857		K. hunti	13.1513	13.1513	0.633403	0.2	397.043	0.0100477	-0.181687		P1-92-AR-PC30	765	K. hunti	139	92.0141	12.0519	12.0519	0.150766	12.0118	0.133164
P40	700	C. teretis	386.5	398.126	0.1823	2.9179		K. hunti	11.7431	11.7431	0.0152258	0.1	397.705	-0.390659	0.0159287		P1-92-AR-PC30	765	K. minima	139	92.0141	14.063	10.8285	-0.386281	13.2801	0.689958
P9	1400	C. wuellerstorfi	418.25	398.309	0.05805	3.73679		K. hunti	10.6112	10.6112	-0.481682	0.100833	398.267	0.428398	0.035921		P1-92-AR-PC30	765	K. hunti	140	92.6237	12.5665	12.5665	0.376683	14.9557	1.42554
P30	765	C. teretis	593	398.367	1.1562	3.37742						0.105833	398.733	0.0700248	0.274557		HLY0503-6JPC	800	K. hunti	19.5	93.186	16.9671	16.9671	2.30856	15.0885	1.48383
P30	765	C. teretis	594	399.523	1.49345	3.6151		K. hunti	13.5308	13.5308	0.800008	0.193333	399.635	0.325248	0.131273		HLY0503-6JPC	800	K. hunti	20.5	94.3109	22.3644	22.3644	4.67796	16.2553	1.99606
P40	700	C. teretis	390.5	401.016	0.36125	3.32715		K. hunti	10.8633	10.8633	-0.370996	0	400.639	-0.00145363	-0.0364066		P1-92-AR-PC30	765	K. hunti	144	95.0621	12.7158	12.7158	0.442244	16.662	2.17461
P40	700	C. teretis	391	401.377	1.08375	2.89559		K. hunti	11.1449	11.1449	-0.24739	0	401.618	-0.433014	-0.216409		HLY0503-6JPC	800	K. hunti	21.5	95.4359	16.6626	16.6626	2.17487	15.7301	1.7655
P40	700	C. teretis	392.5	402.461	0.38235	3.09453		K. hunti	11.8848	11.8848	0.0774255	0.0963636	402.227	-0.21476	-0.0676757		P1-92-AR-P39	1470	K. hunti	115.5	96.1972	14.6	14.6	1.2694	14.0114	1.01101
P21	1470	C. teretis	220.5	402.844	0.1478	3.71924						0.27	402.765	0.444747	0.150211		P1-92-AR-PC30	765	K. minima	151	99.3293	15.9838	12.3075	0.263005	13.6653	0.859056
P30	765	C. teretis	597	402.991	3.08235	3.48913						0.3	403.97	0.220646	0.306804		P1-92-AR-PC30	765	K. hunti	152	99.9389	13.7712	13.7712	0.905546	12.6296	0.404375
P40	700	C. teretis	397.5	406.074	0.3429	3.54791						0.178182	405.161	0.255018	0.271458		P1-92-AR-PC30	765	K. minima	152	99.9389	14.2664	10.9851	-0.317545	12.4496	0.325355
P9	1400	C. wuellerstorfi	419.75	406.417	1.05385	3.64436						0.114545	406.654	0.33871	0.214864		P1-94-AR-PC9	1035	K. hunti	133.25	101.891	11.484	11.484	-0.0985321	12.4222	0.313327
P39	1470	C. teretis	317	407.471	0.6915	3.37946		K. hunti	10.2431	10.2431	-0.643274	0	407.35	0.050863	0.225368		P1-92-AR-P39	1470	K. hunti	123.5	102.513	13.7	13.7	0.8743	12.111	0.17671
P21	1470	C. teretis	222.5	408.162	2.24675	3.61513		K. hunti	13.2094	13.2094	0.658914	0	408.68	0.286529	0.0306337		P1-94-AR-PC9	1035	K. hunti	134.75	102.992	12.1705	12.1705	0.202866	12.3449	0.279419
P40	700	C. teretis	403.5	410.409	0.36125	3.14323						-0.3	409.78	-0.245491	-0.0058635		P1-94-AR-PC9	1035	K. hunti	135.75	103.727	12.2152	12.2152	0.222458	14.2881	1.13249
P40	700	C. teretis	404	410.77	1.05205	3.33009						-0.3	411	-0.0586287	-0.155802		P1-94-AR-PC9	1035	K. hunti	136.25	104.094	12.1549	12.1549	0.196004	14.5881	1.26419
P9	1400	C. teretis	420.75	411.822	0.41895	3.20453		K. hunti	10.4992	10.4992	-0.530847	-0.195714	411.611	-0.163287	0.0350613		P1-92-AR-P39	1470	K. hunti	126	104.487	21.2	21.2	4.1668	14.7005	1.31353
P30	765	C. teretis	605	412.241	0.2485	3.67689						-0.105714	412.184	0.3271	0.219774		P1-92-AR-P39	1470	K. hunti	127	105.276	15.2	15.2	1.5328	14.7785	1.34777
P39	1470	C. teretis	323	412.49	0.9909	3.83456						-0.0521429	412.737	0.49551	0.481807		P1-94-AR-PC9	1035	K. hunti	139.25	106.296	12.7325	12.7325	0.449572	15.9215	1.84955
P21	1470	C. teretis	224.5	413.48	0.54085	3.93137		K. hunti	15.1557	15.1557	1.51336	0.1	413.33	0.622811	0.41021		P1-94-AR-PC9	1035	K. minima	139.25	106.296	16.3703	12.6052	0.393662	14.4456	1.2016
P40	700	C. teretis	408.5	414.021	1.08375	3.40119		K. hunti	11.7869	11.7869	0.0344394	0.198182	414.202	0.112308	0.323096		P1-93-AR-21	1470	K. hunti	97	108.055	17.87	17.87	2.70493	14.0997	1.04978
P40	700	C. teretis	410	415.105	0.6046	3.5454		K. hunti	10.5256	10.5256	-0.519264	0.0866667	414.945	0.23417	0.246275		P1-94-AR-PC9	1035	K. hunti	142.25	108.499	13.8201	13.8201	0.927037	14.4209	1.19079
P30	765	C. teretis	608	415.71	1.20165	3.75401						-0.165	415.909	0.392348	0.308538		P1-94-AR-PC9	1035	K. hunti	143.75	109.6	13.4708	13.4708	0.773679	14.6429	1.28822
P40	700	C. teretis	412.5	416.911	1.88755	3.56758		K. hunti	11.685	11.685	-0.0102723	0.3	417.14	0.299095	0.427975		P1-94-AR-PC9	1035	K. hunti	144.75	110.334	14.3386	14.3386	1.15463	13.5781	0.820789
P21	1470	C. teretis	226.5	418.799	1.2192	3.86096		K. hunti	15.233	15.233	1.54727	0.3	418.576	0.592482	0.472825		P1-94-AR-PC9	1035	K. hunti	145.25	110.702	13.7148	13.7148	0.880798	12.4319	0.317611
P39	1470	C. teretis	332	420.018	1.4726	3.87516		K. hunti	10.6575	10.6575	-0.461362	-0.0980952	420.102	0.526899	0.323765		P1-94-AR-PC9	1035	K. minima	145.25	110.702	16.2938	12.5462	0.367797	12.3243	0.270368
P30	765	C. teretis	613	421.491	1.14225	3.17212						0.0419048	421.38	-0.148086	0.278251		P1-92-AR-PC30	765	K. minima	170	110.912	10.5054	8.08917	-1.58885	11.978	0.11835
P9	1400	C. wuellerstorfi	422.75	422.633	1.48435	3.7645						0.1	422.747	0.455942	0.298272		P1-92-AR40	700	K. hunti	141	111.59	12.9327	12.9327	0.537462	11.8095	0.0443578
P21	1470	C. teretis	228.5	424.117	60.9644	3.89552		K. hunti	13.3081	13.3081	0.702236	0.1	443.944	0.586959	0.440541		P1-94-AR-PC9	1035	K. hunti	146.75	111.803	12.6072	12.6072	0.394545	11.9435	0.103204
P30	765	C. teretis	668	485.082	2.3124	3.66507						-0.288148	465.531	0.278723	0.162592		P1-94-AR-PC9	1035	K. minima	146.75	111.803	16.717	12.8721	0.510836	14.1498	1.07176
P30	765	C. teretis	670	487.394	3.6435	3.01						-0.295926	487.838	-0.377906	0.0732391		HLY0503-6JPC	800	K. hunti	28.5	112.745	13.2165	13.2165	0.66203	14.2967	1.13623
P21	1470	C. teretis	287.5	491.037	2.3316	3.70762						-0.3	490.6	0.3189	0.0776617		P1-92-AR40	700	K. hunti	144	113.892	19.1205	19.1205	3.25391	14.1091	1.05388
P21	1470	C. teretis	289.5	493.369	2.1183	3.69128						-0.352727	493.298	0.291991	0.210917		P1-92-AR-PC30	765	K. hunti	178	115.789	13.6671	13.6671	0.859846	14.8141	1.36338
P30	765	C. teretis	677	495.487	0.2133	3.44689						-0.481212	494.852	0.02186	0.200716		P1-94-AR-PC9	1035	K. minima	152.75	116.208	15.1548	11.6692	-0.0172277	14.5798	1.26053
P21	1470	C. teretis	291.5	495.701	2.3316	3.71588						-0.493939	496.407	0.288296	0.192301		HLY0503-6JPC	800	K. hunti	31.5	117.245	16.3971	16.3971	2.05832	13.6973	0.873094
P21	1470	C. teretis	293.5	498.032	2.3316	3.66741						-0.359583	498.032	0.266746	0.285564		HLY0503-6JPC	800	K. hunti	32.5	118.745	12.0451	12.0451	0.147778	13.3494	0.720386
P21	1470	C. teretis	295.5	500.364	0.9045	3.71041		K. hunti	9.60409	9.60409	-0.923804	-0.4	499.888	0.301649	0.238233		HLY0503-6JPC	800	K. hunti	33.5	120.244	14.7079	14.7079	1.31675	13.5202	0.795349
P30	765	C. teretis	682	501.268	1.1562	3.55506						-0.4	501.352	0.146304	0.0906057		P1-92-AR-PC30	765	K. hunti	186	120.665	11.9278	11.9278	0.0963074	12.8543	0.503029
P30	765	C. teretis	683	502.425	0.2709	3.23309						-0.402308	502.129	-0.176136	0.0639593		P1-92-AR-PC30	765	K. hunti	189	122.494	12.523	12.523	0.357585	13.7592	0.900298
P21	1470	C. teretis	297.5	502.695	4.6632	3.63741						-0.434615	504.16	0.22171	0.0542215		P1-92-AR-PC30	765	K. hunti	190	123.104	13.0677	13.0677	0.596724	14.0478	1.02698
P21	1470	C. teretis	301.5	507.359	2.3316	3.56206		K. hunti	9.74337	9.74337	-0.862659	-0.58069	506.582	0.11709	0.231451		HLY0503-6JPC	800	K. hunti	35.5	123.244	16.5698	16.5698	2.13412	14.3636	1.16561
P21	1470	C. teretis	303.5	509.69	2.3316	3.78442		K. hunti	10.8526	10.8526	-0.375712	-0.500345	509.69	0.355553	0.263021		HLY0503-6JPC	800	K. hunti	36.5	124.744	16.1507	16.1507	1.95017	14.9302	1.41436
P21	1470	C. teretis	305.5	512.022	2.3316	3.74522						-0.5	512.022	0.316419	0.368343		P1-92-AR40	700	K. hunti	159	125.403	13.5067	13.5067	0.789456	15.3298	1.58979
P21	1470	C. teretis	307.5	514.353	0.7893	3.86186						-0.5	513.839	0.433057	0.203968		HLY0503-6JPC	800	K. hunti	37.5	126.244	15.3561	15.3561	1.60132	14.7844	1.35035
P30	765	C. teretis	694	515.143	1.5423	3.29123						-0.5	515.394	-0.137572	0.175224		HLY0503-6JPC	800	K. hunti	38.5	127.744	15.0658	15.0658	1.4739	14.3412	1.1558
P21	1470	C. teretis	309.5	516.685	2.3316	3.64979						-0.454118	516.948	0.230187	0.164475		HLY0503-6JPC	800	K. hunti	39.5	129.244	13.8426	13.8426	0.936902	15.1363	1.50483
P21	1470	C. teretis	311.5	519.017	0.7509	3.79658						-0.335172	518.49	0.40081	0.115942		P1-94-AR-PC9	1035	K. hunti	177.75	133.187	13.9349	13.9349	0.9774	14.5646	1.25388
P30	765	C. teretis	698	519.768	1.5807	3.11778						-0.361034	520.044	-0.283171	0.143784		P1-94-AR-PC9	1035	K. hunti	178.75	134.451	17.482	17.482	2.5346	14.0594	1.0321
P21	1470	C. teretis	313.5	521.348	2.3316	3.72187						-0.397	521.599	0.313713	0.0249398		P1-94-AR-PC9	1035	K. hunti	180.25	136.347	12.4979	12.4979	0.346571	13.9031	0.963471
P21	1470	C. teretis	315.5	523.68	2.3316	3.44932						-0.381467	523.68	0.0442768	0.232497		P1-93-AR-21	1470	K. hunti	129	159.527	12.5399	12.5399	0.365011	14.9421	1.41958
P21	1470	C. teretis	317.5	526.012	2.3316	3.74143						-0.365933	526.012	0.339501	0.261688		P1-93-AR-21	1470	K. hunti	129.5	160.856	13.061	13.061	0.59377	14.1057	1.0524
P21	1470	C. teretis	319.5	528.343	2.3316	3.80011						-0.3504	528.343	0.401286	0.411441		P1-93-AR-P23	951	K. hunti	19.5	164.165	19.1297	19.1297	3.25792	14.9158	1.40806
P21	1470	C. teretis	321.5	530.675	2.3316	3.88925						-0.334867	530.675	0.493538	0.477873		P1-92-AR-P39	1470	K. hunti	159.5	164.446	13.3	13.3	0.6987	15.5782	1.69885
P21	1470	C. teretis	323.5	533.006	2.3316	3.93138						-0.319267	533.006	0.538797	0.596373		P1-92-AR-PC30	765	K. hunti	267	170.043	16.5487	16.5487	2.12488	15.0558	1.46948
P21	1470	C. teretis	325.5	535.338	2.3316	4.14625						-0.303733	535.338	0.756784	0.620782		P1-92-AR-PC30	765	K. hunti	271	172.481	15.8519	15.8519	1.81897	14.6061	1.27206
P21	1470	C. teretis	327.5	537.669	2.3316	3.9593						-0.319032	537.669	0.566765	0.644226		P1-92-AR-PC30	765	K. minima	271	172.481	13.5696	10.4486	-0.553062	14.4318	1.19556
P21	1470	C. teretis	329.5	540.001	2.3316	4.00668						-0.344086	540.001	0.60913	0.617967		P1-93-AR-P23	951	K. hunti	21.5	173.597	16.8812	16.8812	2.27083	13.8171	0.925693
P21	1470	C. teretis	331.5	542.333	1.7151	4.08058						-0.36914	542.127	0.678006	0.525482		P1-92-AR-PC30	765	K. hunti	273	173.701	12.4287	12.4287	0.3162	13.3084	0.702372
P30	765	C. teretis	719	544.048	0.6165	3.69559						-0.387634	543.682	0.28931	0.541208		P1-92-AR-P39	1470	K. minima	163.5	173.713	17.5	13.475	0.775525	13.6828	0.866765
P21	1470	C. teretis	333.5	544.664	2.3316	4.0639						-0.394194	545.236	0.656307	0.506722		P1-92-AR40	700	K. hunti	180	180.891	11.9465	11.9465	0.10451	12.671	0.422584
P21	1470	C. teretis	335.5	546.996	0	4.00286						-0.497561	546.219	0.57455	0.657266		P1-92-AR40	700	K. hunti	182	180.891	12.4036	12.4036	0.305198	12.2921	0.256231
P21	1470	C. teretis	335.5	546.996	2.3316	4.16925						-0.497561	547.773	0.740941	0.63064		P1-92-AR-P39	1470	K. minima	167.5	182.981	16.7	12.859	0.505101	12.1262	0.183398
P21	1470	C. teretis	337.5	549.327	0.5013	3.99335						-0.440732	548.717	0.57643	0.552054		P1-92-AR-PC30	765	K. hunti	293	185.893	11.9593	11.9593	0.110115	11.9325	0.0983816
P30	765	C. teretis	724	549.829	0.6645	3.75327						-0.428537	549.883	0.338792	0.461607		P1-92-AR-PC30	765	K. minima	293	185.893	14.8864	11.4626	-0.107935	12.1516	0.194558
P21	1470	C. teretis	338.5	550.493	1.6479	3.88085						-0.412439	550.821	0.469598	0.335779		P1-92-AR-PC30	765	K. hunti	295	187.112	10.9782	10.9782	-0.320571	11.4772	-0.101488
P30	765	C. teretis	726	552.141	1.8495	3.60489						-0.385926	552.208	0.198946	0.408986		P1-92-AR40	700	K. hunti	188	188.891	13.499	13.499	0.78608	11.8501	0.0622076
P21	1470	C. teretis	341.5	553.991	2.3316	3.95978						-0.363086	554.151	0.558413	0.368464		P1-92-AR-PC30	765	K. minima	299	189.55	12.321	9.48718	-0.975128	13.3526	0.721809
P21	1470	C. teretis	343.5	556.322	1.5999	3.74363						-0.334321	556.078	0.348034	0.35612		HLY0503-6JPC	800	K. hunti	64.5	189.797	13.8237	13.8237	0.928592	13.8767	0.951867
P30	765	C. teretis	731	557.922	0.7317	3.55355						-0.314568	557.633	0.161914	0.199752		HLY0503-6JPC	800	K. hunti	65.5	191.625	18.9751	18.9751	3.19007	13.3175	0.706375
P21	1470	C. teretis	345.5	558.654	5.2461	3.47914						-0.305556	560.159	0.089307	0.22698		P1-92-AR-PC30	765	K. hunti	303	191.988	13.5985	13.5985	0.829721	14.5926	1.26616
P21	1470	C. teretis	350	563.9	-563.9	3.82734						-0.344444		0.429718			P1-92-AR-P39	1470	K. minima	171.5	192.248	13.9	10.703	-0.441383	14.0989	1.0494
																	P1-93-AR-P23	951	K. hunti	25.5	192.461	15.8628	15.8628	1.82378	13.8754	0.951306
																	P1-92-AR-PC30	765	K. hunti	306	193.817	11.3549	11.3549	-0.15521	13.7396	0.891699
																	HLY0503-6JPC	800	K. hunti	69.5	196.698	17.8579	17.8579	2.69962	14.0642	1.03416
																	HLY0503-6JPC	800	K. hunti	71.5	199.234	12.9196	12.9196	0.531685	13.309	0.702663
																	P1-92-AR-PC30	765	K. hunti	316	199.913	12.3256	12.3256	0.270945	14.1632	1.07765
																	HLY0503-6JPC	800	K. hunti	72.5	200.502	12.0872	12.0872	0.166278	13.2873	0.693119
																	HLY0503-6JPC	800	K. hunti	73.5	201.77	15.6258	15.6258	1.71973	14.111	1.05475
																	P1-93-AR-P23	951	K. hunti	27.5	201.893	13.4783	13.4783	0.776956	13.73	0.887455
																	HLY0503-6JPC	800	K. hunti	74.5	203.039	17.0383	17.0383	2.33983	15.0019	1.44585
																	P1-92-AR-PC30	765	K. hunti	323	204.18	10.4202	10.4202	-0.565519	14.4095	1.18577
																	HLY0503-6JPC	800	K. hunti	76.5	205.575	18.447	18.447	2.95825	16.5149	2.11004
																	P1-93-AR-21	1470	K. hunti	146.5	206.063	12.6637	12.6637	0.419354	19.014	3.20715
																	HLY0503-6JPC	800	K. hunti	77.5	206.843	24.0052	24.0052	5.39827	19.2304	3.30217
																	HLY0503-6JPC	800	K. hunti	78.5	208.112	29.534	29.534	7.82542	20.4699	3.84628
																	P1-93-AR-21	1470	K. hunti	147.5	208.722	11.5024	11.5024	-0.0904617	22.751	4.84768
																	HLY0503-6JPC	800	K. hunti	79.5	209.38	24.6442	24.6442	5.67881	20.6845	3.9405
																	HLY0503-6JPC	800	K. hunti	80.5	210.648	24.0692	24.0692	5.42637	20.3342	3.78673
																	P1-93-AR-P23	951	K. hunti	29.5	211.325	13.6729	13.6729	0.862383	23.0327	4.97134
																	HLY0503-6JPC	800	K. hunti	81.5	211.916	27.7826	27.7826	7.05657	20.823	4.00128
																	HLY0503-6JPC	800	K. hunti	82.5	213.185	24.9944	24.9944	5.83256	19.0663	3.2301
																	P1-93-AR-21	1470	K. hunti	149.5	214.04	13.5957	13.5957	0.828513	20.4888	3.8546
																	P1-94-AR-PC9	1035	K. hunti	242.75	215.334	15.2858	15.2858	1.57049	17.8604	2.70073
																	HLY0503-6JPC	800	K. hunti	84.5	215.721	20.7855	20.7855	3.98486	17.818	2.6821
																	P1-93-AR-21	1470	K. hunti	150.5	216.7	14.6406	14.6406	1.28723	17.73	2.64348
																	HLY0503-6JPC	800	K. hunti	85.5	216.989	24.7823	24.7823	5.73944	18.4173	2.94518
																	P1-94-AR-PC9	1035	K. hunti	244.25	217.23	13.1558	13.1558	0.635387	16.6526	2.1705
																	HLY0503-6JPC	800	K. hunti	86.5	218.257	18.7221	18.7221	3.07899	16.7838	2.2281
																	P1-93-AR-21	1470	K. hunti	151.5	219.359	11.9623	11.9623	0.111461	14.3637	1.16564
																	HLY0503-6JPC	800	K. hunti	90.5	223.33	15.2966	15.2966	1.5752	14.1417	1.0682
																	HLY0503-6JPC	800	K. hunti	91.5	224.599	12.6815	12.6815	0.427178	13.7691	0.904622
																	HLY0503-6JPC	800	K. hunti	92.5	225.867	12.046	12.046	0.148184	13.6921	0.870851
																	HLY0503-6JPC	800	K. hunti	93.5	227.135	16.859	16.859	2.26109	13.1132	0.6167
																	P1-93-AR-21	1470	K. hunti	154.5	227.336	11.5777	11.5777	-0.0573945	13.4203	0.751506
																	HLY0503-6JPC	800	K. hunti	94.5	228.403	12.4019	12.4019	0.304445	12.9718	0.5546
																	P1-92-AR-PC30	765	K. hunti	364	229.174	14.2169	14.2169	1.10121	12.029	0.140734
																	P1-92-AR-PC30	765	K. minima	364	229.174	12.7316	9.80331	-0.836347	12.46	0.32993
																	HLY0503-6JPC	800	K. hunti	96.5	230.94	12.1452	12.1452	0.191757	12.0992	0.171551
																	P1-92-AR-PC30	765	K. hunti	368	231.613	13.7325	13.7325	0.888586	12.9604	0.549611
																	P1-92-AR-PC30	765	K. minima	368	231.613	13.7637	10.5981	-0.487449	15.3865	1.61468
																	P1-92-AR40	700	K. hunti	218	232.818	18.5228	18.5228	2.99151	15.0525	1.46806
																	HLY0503-6JPC	800	K. hunti	99	233.476	21.9339	21.9339	4.48897	16.0299	1.89713
																	P1-92-AR-PC30	765	K. minima	372	234.051	13.6044	10.4754	-0.541314	17.1358	2.3826
																	HLY0503-6JPC	800	K. hunti	99.5	234.744	18.6195	18.6195	3.03396	15.6583	1.73399
																	HLY0503-6JPC	800	K. hunti	100.5	236.013	16.1273	16.1273	1.93989	13.6223	0.840175
																	P1-94-AR-PC9	1035	K. hunti	259.25	236.187	11.1354	11.1354	-0.251551	14.4768	1.21531
																	P1-92-AR-PC30	765	K. hunti	376	236.489	11.7537	11.7537	0.0198896	12.9288	0.535721
																	HLY0503-6JPC	800	K. hunti	101.5	237.281	14.748	14.748	1.33436	12.0779	0.162183
																	P1-92-AR-PC30	765	K. hunti	378	237.709	10.8793	10.8793	-0.363986	13.09	0.606498
																	P1-94-AR-PC9	1035	K. hunti	260.75	238.083	11.8729	11.8729	0.0722005	14.7008	1.31365
																	HLY0503-6JPC	800	K. hunti	102.5	238.549	16.196	16.196	1.97002	14.291	1.13373
																	HLY0503-6JPC	800	K. hunti	103.5	239.817	19.8078	19.8078	3.55563	14.3549	1.1618
																	P1-94-AR-PC9	1035	K. hunti	262.25	239.979	12.6989	12.6989	0.434799	14.3861	1.17549
																	P1-92-AR-PC30	765	K. hunti	384	241.366	11.1989	11.1989	-0.223672	14.1885	1.08877
																	P1-94-AR-PC9	1035	K. hunti	263.75	241.874	12.0288	12.0288	0.140657	12.7539	0.458968
																	P1-92-AR40	700	K. hunti	222.5	242.578	15.2083	15.2083	1.53645	12.3552	0.283927
																	P1-94-AR-PC9	1035	K. hunti	265.25	243.77	12.6346	12.6346	0.406603	15.0229	1.45503
																	P1-92-AR-PC30	765	K. hunti	390	245.024	10.7052	10.7052	-0.440406	14.8855	1.39472
																	HLY0503-6JPC	800	K. hunti	107.5	246.863	24.5373	24.5373	5.63186	15.9901	1.87964
																	P1-93-AR-P23	951	K. hunti	37.5	249.053	11.3419	11.3419	-0.160926	16.1526	1.95098
																	HLY0503-6JPC	800	K. hunti	109.5	252.044	20.7313	20.7313	3.96106	16.4544	2.0835
																	HLY0503-6JPC	800	K. hunti	111.5	257.225	13.4472	13.4472	0.763318	13.9575	0.987321
																	HLY0503-6JPC	800	K. hunti	113.5	262.407	12.2146	12.2146	0.222202	14.8291	1.36997
																	P1-93-AR-P23	951	K. hunti	41.5	267.917	12.0523	12.0523	0.150954	13.9119	0.967316
																	P1-92-AR-P39	1470	K. hunti	204.5	268.706	15.7	15.7	1.7523	14.014	1.01214
																	HLY0503-6JPC	800	K. hunti	116.5	270.179	16.1453	16.1453	1.94781	14.4095	1.18576
																	P1-93-AR-21	1470	K. hunti	171.5	272.543	13.9577	13.9577	0.987426	14.666	1.29839
																	HLY0503-6JPC	800	K. hunti	118.5	275.36	14.192	14.192	1.0903	13.9049	0.964265
																	P1-93-AR-P23	951	K. hunti	43.5	277.349	13.3351	13.3351	0.714103	12.3492	0.281313
																	HLY0503-6JPC	800	K. hunti	119.5	277.951	11.8945	11.8945	0.0816942	12.3579	0.285103
																	P1-92-AR-PC30	765	K. hunti	451	282.209	8.36684	8.36684	-1.46696	12.1274	0.18391
																	HLY0503-6JPC	800	K. hunti	121.5	283.132	14.0009	14.0009	1.00638	12.6528	0.414599
																	HLY0503-6JPC	800	K. hunti	122.5	285.723	13.0395	13.0395	0.584334	13.762	0.901505
																	HLY0503-6JPC	800	K. hunti	123.5	288.313	15.9625	15.9625	1.86755	14.6892	1.30858
																	HLY0503-6JPC	800	K. hunti	125.5	293.495	17.4402	17.4402	2.51623	16.6332	2.16196
																	P1-93-AR-21	1470	K. hunti	179.5	293.816	13.0032	13.0032	0.568398	16.4649	2.08808
																	HLY0503-6JPC	800	K. hunti	126.5	296.085	23.7205	23.7205	5.27329	16.7505	2.21345
																	P1-92-AR-PC30	765	K. hunti	478	298.668	12.198	12.198	0.214913	15.738	1.76898
																	HLY0503-6JPC	800	K. hunti	127.5	298.676	17.3905	17.3905	2.49443	15.8528	1.81938
																	P1-93-AR-21	1470	K. hunti	182	300.464	12.3779	12.3779	0.293886	14.7539	1.33695
																	HLY0503-6JPC	800	K. hunti	128.5	300.555	13.5771	13.5771	0.820368	14.6692	1.29978
																	HLY0503-6JPC	800	K. hunti	129.5	301.643	18.2259	18.2259	2.86115	14.501	1.22596
																	P1-93-AR-21	1470	K. hunti	182.5	301.794	11.7746	11.7746	0.0290421	14.7355	1.32888
																	P1-92-AR40	700	K. hunti	255	303.118	16.5498	16.5498	2.12534	14.7193	1.32178
																	P1-94-AR-PC9	1035	K. hunti	318.75	303.804	13.5501	13.5501	0.808495	13.7118	0.879489
																	P1-94-AR-PC9	1035	K. hunti	321.75	304.97	13.4963	13.4963	0.784858	13.7583	0.899896
																	HLY0503-6JPC	800	K. hunti	133.5	305.996	13.1884	13.1884	0.649708	13.2554	0.679121
																	P1-93-AR-P23	951	K. hunti	49.75	306.824	12.007	12.007	0.131078	14.1161	1.05696
																	P1-94-AR-PC9	1035	K. hunti	327.75	307.301	14.0352	14.0352	1.02147	15.2369	1.54899
																	P1-94-AR-PC9	1035	K. hunti	328.75	307.689	17.8535	17.8535	2.69768	14.8617	1.38429
																	P1-94-AR-PC9	1035	K. hunti	329.25	307.884	19.1003	19.1003	3.24502	15.7254	1.76345
																	HLY0503-6JPC	800	K. hunti	135.5	308.173	11.3126	11.3126	-0.173767	15.582	1.70048
																	P1-92-AR40	700	K. hunti	262	308.175	16.3254	16.3254	2.02687	14.7744	1.34596
																	P1-94-AR-PC9	1035	K. hunti	330.75	308.466	13.318	13.318	0.706584	13.2025	0.6559
																	P1-94-AR-PC9	1035	K. hunti	332.25	309.049	13.8158	13.8158	0.925117	13.5	0.786493
																	HLY0503-6JPC	800	K. hunti	136.5	309.261	11.2408	11.2408	-0.205307	12.7075	0.438594
																	P1-92-AR-P39	1470	K. hunti	222.5	310.41	12.8	12.8	0.4792	12.5375	0.363945
																	HLY0503-6JPC	800	K. hunti	138.5	311.438	12.363	12.363	0.287376	12.4529	0.32682
																	HLY0503-6JPC	800	K. hunti	139.5	312.526	12.4677	12.4677	0.333341	13.6988	0.873757
																	P1-94-AR-PC9	1035	K. hunti	341.25	312.546	13.3929	13.3929	0.73949	13.5428	0.805293
																	P1-92-AR-PC30	765	K. hunti	502	313.299	17.4701	17.4701	2.52938	14.002	1.00687
																	HLY0503-6JPC	800	K. hunti	140.5	313.614	12.0202	12.0202	0.136882	14.2386	1.11074
																	P1-94-AR-PC9	1035	K. hunti	344.25	313.711	14.6589	14.6589	1.29524	14.0841	1.04292
																	P1-94-AR-PC9	1035	K. hunti	344.75	313.905	13.6508	13.6508	0.852687	13.0701	0.597769
																	P1-94-AR-PC9	1035	K. hunti	345.75	314.294	12.6206	12.6206	0.400432	13.2918	0.69511
																	P1-92-AR-P39	1470	K. hunti	224.5	315.044	12.4	12.4	0.3036	13.0267	0.578739
																	P1-94-AR-PC9	1035	K. hunti	348.75	315.459	13.1289	13.1289	0.623587	13.0166	0.574282
																	P1-92-AR-PC30	765	K. hunti	506	315.737	13.3335	13.3335	0.713391	13.113	0.616627
																	P1-92-AR-P39	1470	K. hunti	225	316.202	13.6	13.6	0.8304	13.2327	0.669171
																	HLY0503-6JPC	800	K. hunti	143.5	316.879	13.1029	13.1029	0.612159	13.8567	0.943104
																	P1-92-AR-PC30	765	K. hunti	510	318.176	12.9985	12.9985	0.566321	13.5716	0.817914
																	P1-92-AR-PC30	765	K. hunti	513	320.005	16.2489	16.2489	1.99325	13.9671	0.991563
																	P1-94-AR-PC9	1035	K. hunti	360.75	320.121	11.9076	11.9076	0.0874398	13.6152	0.837093
																	P1-92-AR-PC30	765	K. hunti	514	320.614	15.5778	15.5778	1.69865	13.5743	0.819103
																	P1-94-AR-PC9	1035	K. hunti	362.25	320.704	11.3435	11.3435	-0.160192	12.7534	0.458745
																	HLY0503-6JPC	800	K. hunti	147.5	321.232	12.7936	12.7936	0.476369	12.5324	0.361732
																	HLY0503-6JPC	800	K. hunti	148.5	322.32	12.1446	12.1446	0.19146	11.7622	0.0236087
																	P1-92-AR-PC30	765	K. hunti	518	323.053	10.8027	10.8027	-0.397626	12.0935	0.169047
																	HLY0503-6JPC	800	K. hunti	149.5	323.408	11.7267	11.7267	0.00803204	11.9547	0.108103
																	P1-92-AR-P39	1470	K. hunti	228.5	324.312	13	13	0.567	12.1584	0.197527
																	P1-94-AR-PC9	1035	K. hunti	372.75	324.783	12.0994	12.0994	0.171651	12.487	0.341777
																	P1-93-AR-P23	951	K. hunti	54	326.867	13.163	13.163	0.638576	12.6445	0.41095
																	P1-94-AR-PC9	1035	K. hunti	379.75	327.503	12.4456	12.4456	0.323626	12.6657	0.420232
																	P1-92-AR-PC30	765	K. hunti	526	327.929	12.5146	12.5146	0.353896	12.4585	0.329295
																	P1-94-AR-PC9	1035	K. hunti	381.75	328.28	13.1057	13.1057	0.613409	12.4259	0.31498
																	P1-92-AR-PC30	765	K. hunti	527	328.539	11.0637	11.0637	-0.283034	12.4957	0.345609
																	P1-92-AR-P39	1470	K. hunti	230.5	328.945	13	13	0.567	12.7111	0.440183
																	P1-94-AR-PC9	1035	K. hunti	384.75	329.445	12.7945	12.7945	0.476772	12.5937	0.388619
																	P1-94-AR-PC9	1035	K. hunti	386.25	330.028	13.5917	13.5917	0.826769	12.7372	0.451639
																	P1-92-AR-PC30	765	K. hunti	530	330.368	12.5184	12.5184	0.355586	12.8321	0.49328
																	P1-94-AR-PC9	1035	K. hunti	387.75	330.611	11.7815	11.7815	0.0320669	12.8051	0.481458
																	HLY0503-6JPC	800	K. hunti	156.5	331.026	13.4743	13.4743	0.775207	12.123	0.181977
																	HLY0503-6JPC	800	K. hunti	157.5	332.114	12.6598	12.6598	0.417659	11.7468	0.016861
																	P1-94-AR-PC9	1035	K. hunti	393.75	332.942	10.1808	10.1808	-0.670632	11.5505	-0.0693124
																	P1-94-AR-PC9	1035	K. hunti	395.25	333.525	10.6378	10.6378	-0.469996	11.2141	-0.216989
																	P1-92-AR-P39	1470	K. hunti	232.5	333.579	10.8	10.8	-0.3988	10.7904	-0.403025
																	P1-94-AR-PC9	1035	K. hunti	395.75	333.719	11.7923	11.7923	0.0368247	11.3671	-0.149855
																	P1-94-AR-PC9	1035	K. hunti	396.75	334.107	10.541	10.541	-0.512522	11.8681	0.0700805
																	HLY0503-6JPC	800	K. hunti	159.5	334.291	13.0643	13.0643	0.595217	12.1248	0.18277
																	HLY0503-6JPC	800	K. hunti	160.5	335.379	13.1428	13.1428	0.629683	12.222	0.225439
																	P1-94-AR-PC9	1035	K. hunti	401.25	335.856	12.0835	12.0835	0.164645	12.8311	0.492858
																	HLY0503-6JPC	800	K. hunti	161.5	336.468	12.2783	12.2783	0.25017	12.6969	0.433939
																	P1-92-AR-PC30	765	K. hunti	548	346.338	13.5867	13.5867	0.824573	12.4263	0.31514
																	P1-93-AR-21	1470	K. hunti	203.5	357.637	12.3932	12.3932	0.300625	12.2865	0.253763
																	P1-93-AR-21	1470	K. hunti	204.5	360.296	11.7897	11.7897	0.0356867	12.5315	0.361315
																	P1-93-AR-P23	951	K. hunti	62	364.595	11.3844	11.3844	-0.14224	12.5197	0.356169
																	P1-93-AR-21	1470	K. hunti	206.5	365.615	13.5033	13.5033	0.787929	12.5308	0.361015
																	P1-92-AR40	700	K. hunti	344	367.42	13.5281	13.5281	0.798845	12.6728	0.423378
																	P1-93-AR-21	1470	K. hunti	207.5	368.274	12.4484	12.4484	0.324855	13.2677	0.684509
																	P1-92-AR-P39	1470	K. hunti	272.5	370.246	12.5	12.5	0.3475	12.967	0.552523
																	P1-93-AR-21	1470	K. hunti	208.5	370.933	14.3586	14.3586	1.16342	13.0113	0.57197
																	P1-92-AR-P39	1470	K. hunti	274.5	371.919	12	12	0.128	12.9821	0.559147
																	P1-92-AR40	700	K. hunti	351	372.478	13.7496	13.7496	0.896077	13.1903	0.65055
																	HLY0503-6JPC	800	K. hunti	173.5	372.485	12.3024	12.3024	0.260744	12.5773	0.381448
																	P1-92-AR-P39	1470	K. hunti	276.5	373.592	13.541	13.541	0.804511	12.406	0.306244
																	P1-93-AR-21	1470	K. hunti	209.5	373.592	11.2936	11.2936	-0.18209	12.1195	0.180476
																	HLY0503-6JPC	800	K. hunti	174.5	374.833	11.1435	11.1435	-0.248023	12.2018	0.216583
																	P1-93-AR-21	1470	K. hunti	210	374.922	12.3172	12.3172	0.267237	11.8374	0.0565969
																	P1-92-AR-P39	1470	K. hunti	278.5	375.265	12.7136	12.7136	0.441281	12.6214	0.400796
																	HLY0503-6JPC	800	K. hunti	175.5	376.5	11.7189	11.7189	0.00457912	12.8061	0.481863
																	P1-92-AR40	700	K. hunti	358	377.535	15.2139	15.2139	1.5389	12.6288	0.404022
																	HLY0503-6JPC	800	K. hunti	176.5	378.167	12.0668	12.0668	0.157314	12.7897	0.474659
																	P1-93-AR-21	1470	K. hunti	211.5	378.911	11.4306	11.4306	-0.121967	12.8133	0.485024
																	P1-92-AR40	700	K. hunti	360.5	379.341	13.5181	13.5181	0.794461	12.4777	0.337727
																	HLY0503-6JPC	800	K. hunti	177.5	379.833	11.8369	11.8369	0.0564076	12.7701	0.466078
																	HLY0503-6JPC	800	K. hunti	178.5	381.5	13.5363	13.5363	0.80242	12.8979	0.522198
																	P1-93-AR-21	1470	K. hunti	212.5	381.57	13.5286	13.5286	0.799067	12.691	0.431364
																	P1-92-AR-P39	1470	K. hunti	286.5	381.957	12.0698	12.0698	0.158633	12.6569	0.416362
																	P1-92-AR40	700	K. hunti	364.5	382.231	12.4836	12.4836	0.340291	12.5332	0.362096
																	P1-93-AR-P23	951	K. hunti	65.75	382.28	11.6661	11.6661	-0.0185992	12.0341	0.142961
																	HLY0503-6JPC	800	K. hunti	179.5	383.167	12.9182	12.9182	0.531088	11.7356	0.0119267
																	P1-92-AR-P39	1470	K. hunti	288.5	383.63	11.0328	11.0328	-0.296608	11.7113	0.0012608
																	P1-93-AR-21	1470	K. hunti	213.5	384.229	10.5774	10.5774	-0.496538	11.7974	0.0390473
																	P1-92-AR40	700	K. hunti	368	384.76	12.3621	12.3621	0.286962	11.7386	0.0132491
																	HLY0503-6JPC	800	K. hunti	180.5	384.833	12.0964	12.0964	0.170333	12.0314	0.141794
																	P1-92-AR-P39	1470	K. hunti	290.5	385.303	12.6244	12.6244	0.402097	12.4141	0.309778
																	HLY0503-6JPC	800	K. hunti	181.5	386.5	12.4968	12.4968	0.346116	12.6908	0.431281
																	P1-92-AR40	700	K. hunti	370.5	386.566	12.4906	12.4906	0.343384	12.6669	0.420749
																	P1-92-AR-P39	1470	K. hunti	292.5	386.976	13.746	13.746	0.894476	12.6237	0.401818
																	P1-92-AR40	700	K. hunti	372.5	388.011	11.9765	11.9765	0.117673	12.5239	0.358002
																	HLY0503-6JPC	800	K. hunti	182.5	388.167	12.4087	12.4087	0.30744	12.5717	0.37899
																	P1-93-AR-P23	951	K. hunti	67	388.175	11.9978	11.9978	0.127038	12.6229	0.40145
																	P1-92-AR-P39	1470	K. hunti	294.5	388.649	12.7297	12.7297	0.448325	12.5506	0.369734
																	P1-92-AR40	700	K. hunti	374.5	389.456	14.0018	14.0018	1.00677	12.6966	0.433821
																	P1-93-AR-21	1470	K. hunti	215.5	389.548	11.6153	11.6153	-0.0409044	13.1603	0.637369
																	P1-92-AR40	700	K. hunti	375	389.817	13.1387	13.1387	0.627876	12.9111	0.527962
																	HLY0503-6JPC	800	K. hunti	183.5	389.833	14.3161	14.3161	1.14477	12.797	0.477864
																	P1-94-AR-PC9	1035	K. hunti	416.75	390.2	11.4836	11.4836	-0.0987091	13.0981	0.610067
																	P1-92-AR-PC30	765	K. hunti	586	390.273	13.4312	13.4312	0.756282	12.9243	0.533782
																	P1-92-AR-P39	1470	K. hunti	296.5	390.322	13.121	13.121	0.620113	12.2619	0.24298
																	P1-92-AR40	700	K. hunti	376.5	390.901	12.2698	12.2698	0.246449	12.4949	0.345266
																	P1-93-AR-21	1470	K. hunti	216.5	392.207	11.004	11.004	-0.309235	11.8226	0.0501347
																	P1-92-AR40	700	K. hunti	378.5	392.346	12.6486	12.6486	0.412718	11.7456	0.0163254
																	P1-93-AR-21	1470	K. hunti	217	393.536	10.0698	10.0698	-0.719372	11.6926	-0.00693971
																	P1-92-AR40	700	K. hunti	380.5	393.791	12.7359	12.7359	0.451067	11.8116	0.0452968
																	P1-92-AR-PC30	765	K. hunti	590	394.898	12.0048	12.0048	0.130124	11.8936	0.0812845
																	P1-92-AR40	700	K. hunti	384	396.32	11.599	11.599	-0.0480521	12.5099	0.35184
																	HLY0503-6JPC	800	K. hunti	187.5	396.5	13.0584	13.0584	0.592656	12.1673	0.201425
																	P1-92-AR40	700	K. hunti	384.5	396.681	13.1513	13.1513	0.633403	12.2575	0.241028
																	P1-93-AR-21	1470	K. hunti	218.5	397.525	11.0228	11.0228	-0.301008	12.2863	0.253683
																	P1-93-AR-P23	951	K. hunti	69	397.607	12.4559	12.4559	0.328138	11.7968	0.0388155
																	P1-92-AR40	700	K. hunti	386.5	398.126	11.7431	11.7431	0.0152258	11.8727	0.0721365
																	P1-94-AR-PC9	1035	K. hunti	418.25	398.309	10.6112	10.6112	-0.481682	11.9819	0.120056
																	P1-92-AR-PC30	765	K. hunti	594	399.523	13.5308	13.5308	0.800008	12.1081	0.175446
																	HLY0503-6JPC	800	K. hunti	189.5	399.833	11.5685	11.5685	-0.0614122	11.9321	0.098202
																	P1-92-AR-PC30	765	K. hunti	595	400.679	13.0868	13.0868	0.605092	12.0826	0.164263
																	P1-92-AR40	700	K. hunti	390.5	401.016	10.8633	10.8633	-0.370996	11.6054	-0.0452163
																	P1-92-AR-P39	1470	K. hunti	309.5	401.197	11.3636	11.3636	-0.151375	11.6687	-0.0174488
																	P1-92-AR40	700	K. hunti	391	401.377	11.1449	11.1449	-0.24739	11.6874	-0.00924098
																	P1-92-AR40	700	K. hunti	392.5	402.461	11.8848	11.8848	0.0774255	11.9449	0.103831
																	P1-92-AR-P39	1470	K. hunti	311.5	402.87	13.1803	13.1803	0.646131	12.4113	0.30858
																	P1-92-AR-PC30	765	K. hunti	598	404.148	12.1512	12.1512	0.194365	12.4119	0.308834
																	P1-92-AR40	700	K. hunti	396.5	405.351	13.6956	13.6956	0.872369	12.4358	0.3193
																	HLY0503-6JPC	800	K. hunti	193.5	406.5	11.1478	11.1478	-0.246119	11.8483	0.0614191
																	P1-92-AR-P39	1470	K. hunti	316.5	407.052	12.004	12.004	0.129754	11.612	-0.0423477
																	P1-92-AR-P39	1470	K. hunti	317	407.471	10.2431	10.2431	-0.643274	11.5147	-0.0850387
																	P1-92-AR40	700	K. hunti	399.5	407.519	10.9693	10.9693	-0.324469	11.8598	0.0664314
																	P1-93-AR-21	1470	K. hunti	222.5	408.162	13.2094	13.2094	0.658914	11.727	0.00817117
																	HLY0503-6JPC	800	K. hunti	194.5	408.167	12.873	12.873	0.511232	11.8104	0.0447595
																	HLY0503-6JPC	800	K. hunti	195.5	409.833	11.3404	11.3404	-0.161547	12.0016	0.12871
																	P1-92-AR40	700	K. hunti	403	410.048	10.6598	10.6598	-0.460333	11.5415	-0.0732908
																	P1-92-AR-P39	1470	K. hunti	320.5	410.398	11.9255	11.9255	0.095284	11.0667	-0.281706
																	P1-92-AR40	700	K. hunti	404.5	411.131	10.9087	10.9087	-0.35109	10.9547	-0.330907
																	P1-94-AR-PC9	1035	K. hunti	420.75	411.822	10.4992	10.4992	-0.530847	11.2049	-0.221028
																	HLY0503-6JPC	800	K. hunti	197.5	413.167	10.7801	10.7801	-0.407548	11.851	0.062588
																	P1-92-AR-PC30	765	K. hunti	606	413.397	11.9113	11.9113	0.0890623	12.0266	0.139694
																	P1-93-AR-21	1470	K. hunti	224.5	413.48	15.1557	15.1557	1.51336	12.0319	0.14201
																	P1-92-AR40	700	K. hunti	408.5	414.021	11.7869	11.7869	0.0344394	12.2206	0.224858
																	P1-92-AR40	700	K. hunti	410	415.105	10.5256	10.5256	-0.519264	12.03	0.141187
																	P1-92-AR-P39	1470	K. hunti	326.5	415.417	11.7237	11.7237	0.0066921	11.1347	-0.251849
																	P1-92-AR40	700	K. hunti	410.5	415.466	10.9583	10.9583	-0.329294	11.1674	-0.237521
																	P1-93-AR-21	1470	K. hunti	225.5	416.14	10.6792	10.6792	-0.451817	11.4563	-0.11068
																	HLY0503-6JPC	800	K. hunti	199.5	416.5	11.9501	11.9501	0.106081	11.4486	-0.114073
																	P1-92-AR-PC30	765	K. hunti	609	416.866	11.9702	11.9702	0.114936	12.3035	0.26124
																	P1-92-AR40	700	K. hunti	412.5	416.911	11.685	11.685	-0.0102723	12.3094	0.263829
																	P1-93-AR-21	1470	K. hunti	226.5	418.799	15.233	15.233	1.54727	12.3594	0.285773
																	P1-92-AR-P39	1470	K. hunti	331.25	419.391	10.7087	10.7087	-0.438871	12.0968	0.170513
																	HLY0503-6JPC	800	K. hunti	201.5	419.833	12.2	12.2	0.215801	12.0498	0.149852
																	P1-92-AR-P39	1470	K. hunti	332	420.018	10.6575	10.6575	-0.461362	11.4631	-0.107715
																	P1-92-AR-P39	1470	K. hunti	334.5	422.109	11.4497	11.4497	-0.113577	11.9829	0.120507
																	P1-92-AR-PC30	765	K. hunti	614	422.647	12.2994	12.2994	0.259435	11.9174	0.0917189
																	P1-93-AR-21	1470	K. hunti	228.5	424.117	13.3081	13.3081	0.702236	11.9685	0.11416
																	P1-93-AR-P23	951	K. hunti	75	425.903	11.8721	11.8721	0.0718616	11.962	0.1113
																	P1-93-AR-P23	951	K. hunti	77	435.335	10.9131	10.9131	-0.349158	11.9429	0.102919
																	P1-93-AR-P23	951	K. hunti	80.75	453.02	11.4171	11.4171	-0.127877	11.5532	-0.0681298
																	P1-93-AR-P23	951	K. hunti	82	458.915	12.2039	12.2039	0.217531	11.1709	-0.235989
																	P1-92-AR-PC30	765	K. hunti	671	488.55	11.3599	11.3599	-0.153007	11.1341	-0.252132
																	HLY0503-6JPC	800	K. hunti	223.5	492.543	9.96028	9.96028	-0.767436	10.9523	-0.331935
																	HLY0503-6JPC	800	K. hunti	224.5	495.778	10.7292	10.7292	-0.42987	10.6824	-0.450432
																	P1-92-AR-PC30	765	K. hunti	678	496.644	10.5082	10.5082	-0.526891	10.9485	-0.333591
																	HLY0503-6JPC	800	K. hunti	225.5	499.013	10.8543	10.8543	-0.374955	10.8773	-0.364864
																	P1-93-AR-P23	951	K. hunti	86	500.054	12.6907	12.6907	0.431198	10.9097	-0.35064
																	P1-93-AR-21	1470	K. hunti	295.5	500.364	9.60409	9.60409	-0.923804	10.832	-0.384774
																	P1-92-AR-PC30	765	K. hunti	683	502.425	10.8912	10.8912	-0.358747	10.7651	-0.4141
																	P1-93-AR-21	1470	K. hunti	299.5	505.027	10.1195	10.1195	-0.697561	10.1757	-0.672871
																	HLY0503-6JPC	800	K. hunti	228	505.484	10.5203	10.5203	-0.521585	10.4254	-0.563252
																	P1-93-AR-21	1470	K. hunti	301	506.776	9.74337	9.74337	-0.862659	10.3076	-0.614957
																	P1-93-AR-21	1470	K. hunti	303.5	509.69	10.8526	10.8526	-0.375712	10.6703	-0.455729
																	P1-92-AR-PC30	765	K. hunti	695	516.299	10.3023	10.3023	-0.61727	10.6002	-0.486501
																	P1-93-AR-P23	951	K. hunti	88	517.972	11.933	11.933	0.0985812	10.9295	-0.341952
																	P1-92-AR-PC30	765	K. hunti	699	520.924	10.1698	10.1698	-0.675448	10.6998	-0.442775
																	P1-93-AR-P23	951	K. hunti	90	535.89	11.3897	11.3897	-0.139909	11.056	-0.286423
																	P1-92-AR-PC30	765	K. hunti	720	545.204	9.70426	9.70426	-0.879829	10.713	-0.436982
																	P1-92-AR-PC30	765	K. hunti	721.5	546.938	12.0831	12.0831	0.16449	10.6323	-0.472415
																	P1-92-AR-PC30	765	K. hunti	725	550.985	10.2182	10.2182	-0.654211	10.7732	-0.410557
																	P1-92-AR-PC30	765	K. hunti	732	559.078	9.76625	9.76625	-0.852616	11.0171	-0.303472
																	P1-93-AR-P23	951	K. hunti	95	580.685	12.0943	12.0943	0.169381	10.515	-0.523935
																	P1-93-AR-P23	951	K. hunti	145.5	673.708	10.9239	10.9239	-0.344404	10.5247	-0.519661
																	P1-93-AR-P23	951	K. hunti	149.5	691.717	9.57215	9.57215	-0.937825	10.8384	-0.381935
																	P1-93-AR-P23	951	K. hunti	152	698.756	10.2669	10.2669	-0.63284	10.5318	-0.516542
																	P1-93-AR-P23	951	K. hunti	169.75	748.731	11.3349	11.3349	-0.163989	10.7691	-0.412384
																	P1-93-AR-P23	951	K. hunti	171	752.251	10.5612	10.5612	-0.503651	11.0708	-0.279917
																	P1-93-AR-P23	951	K. hunti	173	757.881	12.1102	12.1102	0.176386	11.2255	-0.211998
																	P1-93-AR-P23	951	K. hunti	175	763.513	11.0809	11.0809	-0.27549	11.378	-0.145079
																	P1-93-AR-P23	951	K. hunti	177	769.144	11.0404	11.0404	-0.293248	11.6876	-0.00915129
																	P1-93-AR-P23	951	K. hunti	179	774.774	12.0971	12.0971	0.170608	11.5145	-0.0851386
																	P1-93-AR-P23	951	K. hunti	181	780.406	12.1093	12.1093	0.175987	11.6374	-0.0311886
																	P1-93-AR-P23	951	K. hunti	183	786.036	11.2448	11.2448	-0.20355	11.9621	0.111383
																	P1-93-AR-P23	951	K. hunti	185.75	793.779	11.6954	11.6954	-0.00573999	11.75	0.018258
																	P1-93-AR-P23	951	K. hunti	186.5	795.891	12.6643	12.6643	0.419611	11.606	-0.0449846
																	P1-93-AR-P23	951	K. hunti	188.5	801.522	11.0364	11.0364	-0.295018	11.6492	-0.0260003
																	P1-93-AR-P23	951	K. hunti	190.5	807.153	11.389	11.389	-0.140226	11.8305	0.0535927
																	P1-93-AR-P23	951	K. hunti	192.5	812.784	11.461	11.461	-0.108629	11.7153	0.00300833
																	P1-93-AR-P23	951	K. hunti	194.5	818.415	12.6019	12.6019	0.392225	11.8403	0.0578799
																	P1-93-AR-P23	951	K. hunti	196.5	824.046	12.0881	12.0881	0.166689	11.7702	0.027137
																	P1-93-AR-P23	951	K. hunt+K. aq	200.5	835.308	11.6614	11.6614	-0.0206599	11.8485	0.0615009
																	P1-93-AR-P23	951	K. hunt+K. aq	200.75	836.012	11.0389	11.0389	-0.29394	11.558	-0.0660269
																	P1-93-AR-P23	951	K. hunt+K. aq	202.5	840.939	11.8524	11.8524	0.0631905	11.4938	-0.0942393
																	P1-93-AR-P23	951	K. hunti	204.5	846.57	11.1494	11.1494	-0.245414	11.3576	-0.154008
																	P1-93-AR-P23	951	K. hunti	206.5	852.201	11.7668	11.7668	0.0256273	11.5117	-0.0863487
																	P1-93-AR-P23	951	K. hunti	208.5	857.832	10.9806	10.9806	-0.319502	11.3684	-0.149289
																	P1-93-AR-P23	951	K. hunti	210.5	863.463	11.8095	11.8095	0.0443544	11.5058	-0.0889688
																	P1-93-AR-P23	951	K. hunti	212.5	869.094	11.1355	11.1355	-0.251512	11.4031	-0.134061
																	P1-93-AR-P23	951	K. hunti	216.25	879.652	11.8364	11.8364	0.0561878	11.5635	-0.0636295
																	P1-93-AR-P23	951	K. hunti	218.5	885.987	11.2532	11.2532	-0.199832	11.4029	-0.134148
																	P1-93-AR-P23	951	K. hunti	220.5	891.618	11.7828	11.7828	0.0326536	11.449	-0.113882
																	P1-93-AR-P23	951	K. hunti	222.5	897.249	11.0063	11.0063	-0.308236	11.503	-0.0901963
																	P1-93-AR-P23	951	K. hunt+K. aq	224.5	902.88	11.3663	11.3663	-0.150185	11.7412	0.0143845
																	P1-93-AR-P23	951	K. hunti	226.5	908.511	12.1062	12.1062	0.174617	11.7048	-0.00157405
																	P1-93-AR-P23	951	K. aquilonia	228.5	914.142	12.4444	12.4444	0.323072	11.8606	0.0667856
																	P1-93-AR-P23	951	K. hunti	231.75	923.292	11.601	11.601	-0.0471391	12.0062	0.130712
																	P1-93-AR-P23	951	K. hunt+K. aq	234.5	931.035	11.7849	11.7849	0.0335627	11.844	0.0595132
																	P1-93-AR-P23	951	K. aquilonia	236.5	936.666	12.0944	12.0944	0.169447	11.7888	0.0352651
																	P1-93-AR-P23	951	K. aquilonia	238.5	942.297	11.2953	11.2953	-0.181377	11.7407	0.0141612
																	P1-93-AR-P23	951	K. hunt+K. aq	240.5	947.928	12.1682	12.1682	0.201832	11.8395	0.0575546
																	P1-93-AR-P23	951	K. hunt+K. aq	242.5	953.559	11.3607	11.3607	-0.152659	11.8196	0.0487845
																	P1-93-AR-P23	951	K. hunt+K. aq	244.5	959.19	12.2791	12.2791	0.25053	11.8621	0.067462
																	P1-93-AR-P23	951	K. hunt+K. aq	246.75	965.525	11.9945	11.9945	0.125597	11.8273	0.0521742
																	P1-93-AR-P23	951	K. hunt+K. aq	249.5	973.267	11.508	11.508	-0.0879899	12.1158	0.178848
																	P1-93-AR-P23	951	K. hunt+K. aq	251.5	978.898	11.9941	11.9941	0.125393	11.9524	0.107106
																	P1-93-AR-P23	951	K. hunt+K. aq	253.5	984.529	12.8034	12.8034	0.480708	11.8608	0.0668921
																	P1-93-AR-P23	951	K. hunt+K. aq	255.5	990.16	11.462	11.462	-0.10818	11.8103	0.044701
																	P1-93-AR-P23	951	K. hunt+K. aq	257.5	995.791	11.5365	11.5365	-0.0754708	11.7163	0.00345651
																	P1-93-AR-P23	951	K. hunt+K. aq	262.75	1010.57	11.2553	11.2553	-0.198945	11.4869	-0.0972333
																	P1-93-AR-P23	951	K. hunt+K. aq	264.5	1015.5	11.5243	11.5243	-0.08083	11.3876	-0.140831
																	P1-93-AR-P23	951	K. hunt+K. aq	266.5	1021.13	11.6566	11.6566	-0.0227411	11.496	-0.093236
																	P1-93-AR-P23	951	K. hunt+K. aq	268.5	1026.76	10.9654	10.9654	-0.326168	11.561	-0.0647093
																	P1-93-AR-P23	951	K. aquilonia	270.5	1032.39	12.0786	12.0786	0.162504	11.8631	0.0678792
																	P1-93-AR-P23	951	K. hunt+K. aq	273.25	1040.14	11.5802	11.5802	-0.0563116	11.8001	0.0402503
																	P1-93-AR-P23	951	K. hunt+K. aq	275.5	1046.47	13.0344	13.0344	0.582113	11.9648	0.112557
																	P1-93-AR-P23	951	K. hunt+K. aq	277.5	1052.1	11.3419	11.3419	-0.160886	11.9087	0.0879366
																	P1-93-AR-P23	951	K. hunt+K. aq	279.5	1057.73	11.789	11.789	0.0353663	11.9448	0.103756
																	P1-93-AR-P23	951	K. hunt+K. aq	281.5	1063.36	11.7982	11.7982	0.0394018	11.6387	-0.0306133
																	P1-93-AR-P23	951	K. hunt+K. aq	283.5	1068.99	11.7603	11.7603	0.0227873	11.6803	-0.0123583
																	P1-93-AR-P23	951	K. aquilonia	287.75	1080.96	11.504	11.504	-0.0897358	11.5395	-0.0741429
																	P1-93-AR-P23	951	K. hunt+K. aq	289.5	1085.89	11.5499	11.5499	-0.0696113	11.5758	-0.0582265
																	P1-93-AR-P23	951	K. hunt+K. aq	291.5	1091.52	11.0853	11.0853	-0.273556	11.3671	-0.149858
																	P1-93-AR-P23	951	K. hunt+K. aq	293.5	1097.15	11.9795	11.9795	0.118984	11.2829	-0.186788
																	P1-93-AR-P23	951	K. hunt+K. aq	295.5	1102.78	10.7167	10.7167	-0.435368	11.4487	-0.114041
																	P1-93-AR-P23	951	K. hunt+K. aq	297.5	1108.41	11.0834	11.0834	-0.27439	11.5904	-0.0518116
																	P1-93-AR-P23	951	K. hunt+K. aq	299.5	1114.04	12.3784	12.3784	0.294128	11.3898	-0.139893
																	P1-93-AR-P23	951	K. hunt+K. aq	302.75	1123.19	11.7941	11.7941	0.0375884	11.5704	-0.0605726
																	P1-93-AR-P23	951	K. hunt+K. aq	305.5	1130.94	10.9763	10.9763	-0.321421	11.6661	-0.018568
																	P1-93-AR-P23	951	K. hunt+K. aq	307.5	1136.57	11.6201	11.6201	-0.0387686	11.5916	-0.0512836
																	P1-93-AR-P23	951	K. hunt+K. aq	309.5	1142.2	11.5618	11.5618	-0.0643671	11.4944	-0.0939699
																	P1-93-AR-P23	951	K. hunt+K. aq	311.5	1147.83	12.0058	12.0058	0.13055	11.7729	0.0282988
																	P1-93-AR-P23	951	K. hunt+K. aq	313.5	1153.46	11.3079	11.3079	-0.175843	11.7273	0.00828122
																	P1-93-AR-P23	951	K. hunt+K. aq	315.5	1159.09	12.3688	12.3688	0.289922	11.6264	-0.0360072
																	P1-93-AR-P23	951	K. hunt+K. aq	317.75	1165.43	11.3921	11.3921	-0.138856	11.4349	-0.120072
																	P1-93-AR-P23	951	K. hunt+K. aq	320.5	1173.17	11.0574	11.0574	-0.285809	11.4548	-0.111325
																	P1-93-AR-P23	951	K. hunt+K. aq	322.5	1178.8	11.0484	11.0484	-0.289773	11.2636	-0.195291
																	P1-93-AR-P23	951	K. hunt+K. aq	324.5	1184.43	11.4075	11.4075	-0.132108	11.3094	-0.175182
																	P1-93-AR-P23	951	K. hunt+K. aq	326.5	1190.06	11.4125	11.4125	-0.129908	11.4701	-0.104646
																	P1-93-AR-P23	951	K. hunti	328.5	1195.69	11.6212	11.6212	-0.0383131	11.5792	-0.0567217
																	P1-93-AR-P23	951	K. hunti	330.5	1201.32	11.8608	11.8608	0.0668713	11.5607	-0.0648456
																	P1-93-AR-P23	951	K. hunt+K. aq	333.75	1210.47	11.5942	11.5942	-0.0501499	11.7475	0.0171377
																	P1-93-AR-P23	951	K. hunti	335.5	1215.4	11.315	11.315	-0.172728	11.6918	-0.00729579
																	P1-93-AR-P23	951	K. hunti	337.5	1221.03	12.3463	12.3463	0.280008	11.5693	-0.0610964
																	P1-93-AR-P23	951	K. hunt+K. aq	339.5	1226.66	11.3429	11.3429	-0.160481	11.5347	-0.076273
																	P1-93-AR-P23	951	K. hunt+K. aq	341.5	1232.29	11.248	11.248	-0.202132	11.4033	-0.133935
																	P1-93-AR-P23	951	K. hunt+K. aq	343.5	1237.92	11.4213	11.4213	-0.126033	11.5522	-0.0685932
																	P1-93-AR-P23	951	K. hunt+K. aq	345.5	1243.56	10.6582	10.6582	-0.461036	11.2122	-0.217851
																	P1-93-AR-P23	951	K. hunti	348.75	1252.71	13.0905	13.0905	0.606716	11.1462	-0.246825
																	P1-93-AR-P23	951	K. hunti	351.5	1260.45	9.6429	9.6429	-0.906769	11.1161	-0.260048
																	P1-93-AR-P23	951	K. hunti	353.5	1266.08	10.918	10.918	-0.347003	11.1599	-0.240808
																	P1-93-AR-P23	951	K. hunt+K. aq	355.5	1271.71	11.2707	11.2707	-0.192148	10.7449	-0.422984
																	P1-93-AR-P23	951	K. hunti	357.5	1277.34	10.8774	10.8774	-0.364837	10.9578	-0.32954
																	P1-93-AR-P23	951	K. hunt+K. aq	359.5	1282.97	11.0156	11.0156	-0.304165	10.8991	-0.35531
																	P1-93-AR-P23	951	K. hunti	363.75	1294.94	10.7072	10.7072	-0.439545	10.7385	-0.425792
																	P1-93-AR-P23	951	K. hunt+K. aq	378.75	1337.17	10.6245	10.6245	-0.475853	10.9874	-0.31651
																	P1-93-AR-P23	951	K. hunti	380.5	1342.1	10.468	10.468	-0.544559	11.163	-0.23946
																	P1-93-AR-P23	951	K. hunti	382.5	1347.73	12.122	12.122	0.181574	11.2721	-0.191562
																	P1-93-AR-P23	951	K. aquilonia	384.5	1353.36	11.8931	11.8931	0.0810845	11.5991	-0.0479934
																	P1-93-AR-P23	951	K. hunti	386.5	1358.99	11.2527	11.2527	-0.200057	11.8757	0.0734487
																	P1-93-AR-P23	951	K. hunt+K. aq	388.5	1364.62	12.2597	12.2597	0.24199	11.9654	0.112799
																	P1-93-AR-P23	951	K. hunti	390.5	1370.25	11.8511	11.8511	0.0626517	11.9169	0.0915397
																	P1-93-AR-P23	951	K. hunt+K. aq	394.75	1382.22	12.5702	12.5702	0.378326	12.0439	0.14726
																	P1-93-AR-P23	951	K. hunt+K. aq	396.5	1387.15	11.651	11.651	-0.0252118	12.0487	0.149376
																	P1-93-AR-P23	951	K. hunt+K. aq	398.5	1392.78	11.8873	11.8873	0.0785464	11.965	0.112615
																	P1-93-AR-P23	951	K. aquilonia	400.5	1398.41	12.2838	12.2838	0.25257	11.6567	-0.0227162
																	P1-93-AR-P23	951	K. aquilonia	402.5	1404.04	11.4324	11.4324	-0.121155	11.5978	-0.0485611
																	P1-93-AR-P23	951	K. aquilonia	404.5	1409.67	11.0289	11.0289	-0.298331	11.3853	-0.141849
																	P1-93-AR-P23	951	K. hunti	406.5	1415.3	11.3566	11.3566	-0.154436	11.2068	-0.220217
																	P1-93-AR-P23	951	K. hunt+K. aq	409.75	1424.45	10.8248	10.8248	-0.387895	11.0846	-0.273843
																	P1-93-AR-P23	951	K. aquilonia	416.5	1443.46	11.3912	11.3912	-0.139269	11.0379	-0.294352
																	P1-93-AR-P23	951	K. hunt+K. aq	418.5	1449.09	10.8217	10.8217	-0.389283	10.9511	-0.33248
																	P1-93-AR-P23	951	K. hunt+K. aq	422.75	1461.05	10.7953	10.7953	-0.400876	11.0398	-0.293547
																	P1-93-AR-P23	951	K. hunt+K. aq	425.5	1468.8	10.9224	10.9224	-0.345075	11.012	-0.305733
																	P1-93-AR-P23	951	K. hunt+K. aq	427.5	1474.43	11.2683	11.2683	-0.193234	11.1144	-0.26078
																	P1-93-AR-P23	951	K. hunt+K. aq	429.5	1480.06	11.2524	11.2524	-0.200197	11.1434	-0.24803
																	P1-93-AR-P23	951	K. aquilonia	431.5	1485.69	11.3337	11.3337	-0.164517	11.0569	-0.286039
																	P1-93-AR-P23	951	K. hunt+K. aq	435.5	1496.95	10.9405	10.9405	-0.337126	10.9777	-0.320774
																	P1-93-AR-P23	951	K. hunt+K. aq	438.75	1506.1	10.4895	10.4895	-0.535123	10.8713	-0.367506
																	P1-93-AR-P23	951	K. aquilonia	441.5	1513.84	10.8726	10.8726	-0.366909	10.6836	-0.44992
																	P1-93-AR-P23	951	K. aquilonia	443.5	1519.47	10.7201	10.7201	-0.433855	10.5361	-0.514633
																	P1-93-AR-P23	951	K. hunti	445.5	1525.11	10.395	10.395	-0.576587	10.8519	-0.376006
																	P1-93-AR-P23	951	K. hunti	447.5	1530.74	10.2034	10.2034	-0.660689	10.7894	-0.403455
																	P1-93-AR-P23	951	K. hunti	449.5	1536.37	12.0684	12.0684	0.158008
																	P1-93-AR-P23	951	K. hunti	491.5	1654.62	10.56	10.56	-0.504153

## Sheet: Figure 4d
Age [ka BP]	ODP 1123 d18Osw	Arctic d18Osw	∆18Osw (Arctic - 1123)
0	-0.1	0.26	0.36
3		0.318732
5		0.405362
7	-0.072	0.543636	0.615636
9	-0.211	0.77125	0.98225
11	0.176	0.57	0.394
13	0.551	0.68125	0.13025
15	0.572	0.745	0.173
17	0.913	0.858421	-0.0545789
19	1.018	0.88187	-0.13613
21	0.737	0.942773	0.205773
23	0.992	0.9549	-0.0371
25	1.103	0.647302	-0.455698
27	0.855	1.02032	0.165317
29	0.755	0.654641	-0.100359
31	0.748	1	0.252
33	0.795	0.866721	0.0717213
35	1.011	1.02389	0.0128889
37	0.757	1.00333	0.246333
39	0.673	0.568049	-0.104951
41	0.523	0.912927	0.389927
43	0.548	0.445	-0.103
45	0.609	0.760377	0.151377
47	0.708	0.05	-0.658
49	0.673	0.582364	-0.0906364
51	0.566	0.855521	0.289521
53	0.787	1.00414	0.217144
55	0.836	1.09187	0.255875
57	0.857	0.997861	0.140861
59	0.643	1.09768	0.454683
61	0.702	1.1975	0.495504
63	0.533	0.853025	0.320025
65	0.579	0.807509	0.228509
67	0.784	0.936125	0.152125
69	0.263	0.761125	0.498125
71	0.094	0.30871	0.21471
73	0.043	0.618508	0.575508
75	-0.01	0.463514	0.473514
77	0.078	0.463158	0.385158
79	0.475	0.577209	0.102209
81	0.522	0.736294	0.214294
83	-0.121	0.860988	0.981988
85	-0.178	0.72009	0.89809
87	-0.111	0.944305	1.0553
89	-0.029	0.506235	0.535235
91	-0.064	0.41283	0.47683
93	0.182	0.755	0.573
95	0.154	0.725222	0.571222
97	-0.006	0.598759	0.604759
99	0.044	0.618525	0.574525
101	-0.143	0.441111	0.584111
103	0.353	0.642568	0.289568
105	0.25	1.19193	0.941934
107	0.252	0.814545	0.562545
109	0.237	0.750909	0.513909
111	0.454	0.63456	0.18056
113	0.351	0.707225	0.356225
115	0.252	0.72	0.468
117	0.171	0.609268	0.438268
119	0.071	0.572683	0.501683
121	0.119	0.536098	0.417098
123	0.115	0.386143	0.271143
125	-0.03	0.22729	0.25729
127	0.051	0.330516	0.279516
129	0.281	0.433742	0.152742
131	0.782	0.536968	-0.245032
133	0.851	0.640194	-0.210806
135	0.968	0.483158	-0.484842
137	0.844
139	0.857
141	0.792
143	0.795
145	0.631
147	0.712
149	0.756
151	0.406
153	0.488
155	0.551
157	0.593	0.551481	-0.0415185
159	0.404	0.177356	-0.226644
161	0.329	0.210286	-0.118714
163	0.232	0.26953	0.0375301
165	0.386	0.328774	-0.0572257
167	0.344	0.388018	0.0440184
169	0.304	0.447263	0.143263
171	0.262	0.472373	0.210373
173	0.466	-0.0568852	-0.522885
175	0.346	0.186865	-0.159135
177	0.24	0.467635	0.227635
179	0.372	0.748404	0.376404
181	0.398	0.685719	0.287719
183	0.18	0.505477	0.325477
185	0.31	0.325234	0.015234
187	0.171	0.0603279	-0.110672
189	0.172	-0.196475	-0.368475
191	0.209	0.254344	0.0453443
193	0.178	0.499344	0.321344
195	0.308	-0.406619	-0.714619
197	0.209	-0.427972	-0.636972
199	0.003	-0.0909524	-0.0939524
201	-0.092	0.0540569	0.146057
203	0.259	0.185	-0.074
205	-0.029
207	0.119
209	0.295
211	0.171
213	0.097
215	0.065
217	0.308	1.16032	0.852316
219	0.36	0.930694	0.570694
221	0.613	0.660292	0.0472923
223	0.831	0.38989	-0.44111
225	0.719	0.119488	-0.599512
227	0.526	0.15	-0.376
229	0.676	0.167869	-0.508131
231	0.466	-0.16	-0.626
233	0.152	0.611509	0.459509
235	0.244	0.552982	0.308982
237	0.133	0.37978	0.24678
239	0.199	0.5975	0.3985
241	0.35	0.585079	0.235079
243	0.65	0.565158	-0.0848421
245	-0.521
247	0.259
249	0.3
251	0.27
253	0.173
255	-0.162
257	0.638
259	0.836
261	0.444
263	0.623
265	0.744
267	0.283
269	0.901
271	0.51
273	0.227	0.680113	0.453113
275	0.118	0.593647	0.475647
277	-0.084	0.50718	0.59118
279	-0.057
281	-0.032
283	0.275
285	0.358
287	0.27
289	0.467
291	0.516
293	0.407
295	0.381
297	0.207
299	0.3	0.953993	0.653993
301	0.282	1.27629	0.994291
303	0.14	0.534507	0.394507
305	0.516	0.989485	0.473485
307	0.351	0.95515	0.60415
309	0.378	0.592586	0.214586
311	0.208	0.584643	0.376643
313	0.217	0.550779	0.333779
315	-0.043	0.362254	0.405254
317	0.042	0.250219	0.208219
319	0.15	0.517857	0.367857
321	-0.113	0.503304	0.616304
323	-0.395	0.445296	0.840296
325	0.091	0.387289	0.296289
327	-0.1	0.329281	0.429281
329	-0.351	0.532973	0.883973
331	-0.186	0.322929	0.508929
333	-0.052	0.166364	0.218364
335	-0.182
337	0.811
339	0.533
341	0.754
343	0.866
345	0.964
347	0.753
349	0.833
351	0.524
353	0.344
355	0.656
357	0.743
359	0.713
361	0.733	0.503933	-0.229067
363	0.647	0.515169	-0.131831
365	0.559	0.526404	-0.0325955
367	-0.067	0.53764	0.60464
369	-0.044	0.47698	0.52098
371	0.232	0.392632	0.160632
373	0.359	0.0902703	-0.26873
375	0.441	0.360541	-0.0804595
377	0.46	0.544324	0.0843243
379	0.073	0.484021	0.411021
381	-0.365	0.363025	0.728025
383	-0.135	0.282209	0.417209
385	-0.092	0.311326	0.403326
387	-0.063	0.466607	0.529607
389	0.189	0.382973	0.193973
391	0.142	0.339801	0.197801
393	-0.017	0.0898561	0.106856
395	0.11	-0.0243478	-0.134348
397	0.046	-0.0782759	-0.124276
399	-0.397	0.212435	0.609435
401	-0.484	0.0044	0.4884
403	-0.428	0.22013	0.64813
405	-0.374	0.246104	0.620104
407	-0.337	0.17981	0.51681
409	-0.336	0.0884	0.4244
411	-0.035	-0.0819048	-0.0469048
413	-0.238	0.561818	0.799818
415	0.013	0.21789	0.20489
417	0.035	0.31381	0.27881
419	-0.204	0.580164	0.784164
421	0.261	0.0766667	-0.184333
423	0.548	0.492282	-0.0557181
425	0.785
427	1.461
429	1.115
431	0.843
433	1.12
435	1.031
437	1.105
439	1.006
441	0.888
443	1.019
445	0.813
447	0.863
449	0.964
451	1.075
453	0.907
455	0.916
457	0.985
459	0.863
461	0.741
463	0.655
465	0.843
467	0.91
469	0.679
471	0.702
473	0.29
475	0.203
477	0.104
479	0.245
481	0.204
483	0.178
485	0.043	0.280407	0.237407
487	-0.004	-0.268571	-0.264571
489	-0.03	-0.0712329	-0.0412329
491	-0.094	0.312329	0.406329
493	-0.183	0.294764	0.477764
495	-0.085	0.0824057	0.167406
497	-0.134	0.278841	0.412841
499	0	0.282489	0.282489
501	0.124	0.194505	0.0705055
503	0.125	0.213562	0.0885622
505	0.138	0.170644	0.0326438
507	0.153	0.127725	-0.0252747
509	0.628	0.288927	-0.339073
511	0.476	0.337511	-0.138489
513	0.448	0.366266	-0.0817339
515	0.503	-0.0389873	-0.541987
517	0.338	0.252618	-0.085382
519	0.445	0.398541	-0.0464592
521	0.367	0.179304	-0.187696
523	0.56	0.118798	-0.441202
525	0.512	0.209957	-0.302043
527	0.382	0.365494	-0.0165064
529	0.434	0.425494	-0.00850644
531	0.483	0.497051	0.0140513
533	0.341	0.539786	0.198786
535	0.496	0.727897	0.231897
537	0.533	0.624635	0.0916352
539	0.517	0.592833	0.0758326
541	0.596	0.640043	0.0440429
543	0.54	0.528081	-0.0119186
545	0.435	0.659274	0.224274
547	0.378	0.655	0.277
549	0.503	0.590622	0.0876223
551	0.491	0.386545	-0.104455
553	0.564	0.367351	-0.196649
555	0.539	0.46897	-0.07003
557	0.359	0.26925	-0.08975
559	0.253	0.112667	-0.140333
561	0.24	0.24219	0.00219048
563	0.347	0.371714	0.0247143
565	0.316
567	-0.057
569	0.071
571	0.045
573	-0.019
575	0.17
577	-0.03
579	0.001
581	0.285
583	0.464
585	0.589
587	0.361
589	0.337
591	0.305
593	0.388
595	0.312
597	0.344
599	0.469

## Sheet: Figure 5
Panel a (panel b data available in Elderfield et al., 2010)
Core	Water depth	Core depth (cm)	Age (ka)	Species	Cw d18Oeq (Mack)	replicate 1sd	Matched Krithe Species	Mg:KMinimaCorr.77*	BWT (°C)
B8	1031	20.5	12.57	C.wuellerstorfi	3.619		hunti	9.58651	-0.931524
P21	1470	295.5	500.364	C. teretis	3.36041		K. hunti	9.60409	-0.923804
P21	1470	301.5	507.359	C. teretis	3.21206		K. hunti	9.74337	-0.862659
P39	1470	317	407.471	C. teretis	3.02946		K. hunti	10.2431	-0.643274
P9	1400	420.75	411.822	C. teretis	2.85453		K. hunti	10.4992	-0.530847
P9	1400	28.25	24.8001	O.tener	3.47546		K. hunti	10.5193	-0.522012
P40	700	410	415.105	C. teretis	3.1954		K. hunti	10.5256	-0.519264
HLY-18TC	2598	0.5	2.628	C.wuellerstorfi	3.34		hunti	10.5326	-0.516185
P9	1400	396.75	334.107	C. teretis	2.98907		K. hunti	10.541	-0.512522
B8	1031	10.5	8.26	C.wuellerstorfi	3.365		hunti	10.604	-0.484836
P9	1400	418.25	398.309	C. wuellerstorfi	3.38679		K. hunti	10.6112	-0.481682
P30	765	136	90.1853	C. teretis	2.86936		K. hunti	10.6255	-0.475411
B8	1031	11.5	8.33	C.wuellerstorfi	3.646		hunti	10.6321	-0.472513
P39	1470	332	420.018	C. teretis	3.52516		K. hunti	10.6575	-0.461362
B8	1031	7.5	8.07	C.wuellerstorfi	3.521		hunti	10.8139	-0.392678
B8	1031	4.5	7.32	C.wuellerstorfi	3.203		hunti	10.8176	-0.391058
P21	1470	303.5	509.69	C. teretis	3.43442		K. hunti	10.8526	-0.375712
P40	700	390.5	401.016	C. teretis	2.97715		K. hunti	10.8633	-0.370996
B8	1031	8.5	8.13	C.wuellerstorfi	3.46		hunti	10.8657	-0.369966
P21	1470	216.5	392.207	C. teretis	3.35988		K. hunti	11.004	-0.309235
P9	1400	17.75	17.091	C. wuellerstorfi	3.46102		K. hunti	11.0372	-0.294679
B8	1031	14.5	10.88	C.wuellerstorfi	3.376		hunti	11.0758	-0.27772
B8	1031	0.5	4.47	C.wuellerstorfi	3.299		hunti	11.1295	-0.254165
P9	1400	259.25	236.187	C. teretis	3.28614		K. hunti	11.1354	-0.251551
B8	1031	3.5	6.88	C.wuellerstorfi	3.683		hunti	11.1448	-0.247449
P40	700	391	401.377	C. teretis	2.54559		K. hunti	11.1449	-0.24739
B8	1031	2.5	6.23	C.wuellerstorfi	3.289		hunti	11.1819	-0.231131
B8	1031	1.5	5.35	C.wuellerstorfi	3.4015	0.0304056	hunti	11.2667	-0.193937
P9	1400	416.75	390.2	C. teretis	3.15551		K. hunti	11.4836	-0.0987091
P9	1400	133.25	101.891	C. wuellerstorfi	3.45356		K. hunti	11.484	-0.0985321
B8	1031	5.5	7.75	C.wuellerstorfi	3.377		hunti	11.5084	-0.0878293
P40	700	384	396.32	C. teretis	2.738		K. hunti	11.599	-0.0480521
P9	1400	152.75	116.208	C. teretis	3.55007		K. minima	11.6692	-0.0172277
P40	700	412.5	416.911	C. teretis	3.21758		K. hunti	11.685	-0.0102723
P40	700	53	44.0608	C. teretis	2.55771		K. hunti	11.7388	0.0133451
P40	700	386.5	398.126	C. teretis	2.5679		K. hunti	11.7431	0.0152258
HLY-18TC	2598	10.5	9.358	C.wuellerstorfi	3.565		hunti	11.7619	0.0234554
P21	1470	59.5	74.0882	C. teretis	3.38032		K. hunti	11.7716	0.027733
P40	700	408.5	414.021	C. teretis	3.05119		K. hunti	11.7869	0.0344394
P21	1470	204.5	360.296	C. teretis	3.39431		K. hunti	11.7897	0.0356867
P9	1400	395.75	333.719	C. teretis	3.10667		K. hunti	11.7923	0.0368247
P39	1470	54	47.643	C. teretis	3.32233		K. hunti	11.8	0.0402
P40	700	392.5	402.461	C. teretis	2.74453		K. hunti	11.8848	0.0774255
P40	700	180	156.152	C. teretis	2.92741		K. hunti	11.9465	0.10451
P40	700	372.5	388.011	C. teretis	3.06133		K. hunti	11.9765	0.117673
B17	2217	1.5	3.68	C.wuellerstorfi	3.32		hunti	11.9834	0.120724
P39	1470	274	371.501	C. teretis	3.19851		K. hunti	12	0.128
P9	1400	263.75	241.874	C. teretis	3.34583		K. hunti	12.0288	0.140657
P30	765	139	92.0141	C. teretis	3.36678		K. hunti	12.0519	0.150766
P40	700	60	49.4326	C. teretis	3.14514		K. hunti	12.1381	0.188641
P9	1400	136.25	104.094	C. wuellerstorfi	3.61331		K. hunti	12.1549	0.196004
P9	1400	134.75	102.992	C. wuellerstorfi	3.56235		K. hunti	12.1705	0.202866
P40	700	67	54.8044	C. teretis	3.36986		K. hunti	12.2039	0.217521
P9	1400	135.75	103.727	C. wuellerstorfi	3.58099		K. hunti	12.2152	0.222458
P30	765	151	99.3293	C. teretis	3.57704		K. minima	12.3075	0.263005
P21	1470	210.5	376.252	C. teretis	3.3543		K. hunti	12.3172	0.267237
P40	700	368	384.76	C. teretis	3.27749		K. hunti	12.3621	0.286962
HLY-18TC	2598	6.5	7.368	C.wuellerstorfi	3.412		hunti	12.3826	0.295943
P40	700	182	159.638	C. teretis	2.87189		K. hunti	12.4036	0.305198
P40	700	364.5	382.231	C. teretis	3.23646		K. hunti	12.4836	0.340291
P40	700	370.5	386.566	C. teretis	3.2184		K. hunti	12.4906	0.343384
P9	1400	180.25	136.347	C. teretis	3.31986		K. hunti	12.4979	0.346571
P30	765	189	122.494	C. teretis	3.31219		K. hunti	12.523	0.357585
B8	1031	33.5	41.52	C.wuellerstorfi	3.812		hunti	12.523	0.357612
P9	1400	146.75	111.803	C. wuellerstorfi	3.54954		K. hunti	12.6072	0.394545
P9	1400	265.25	243.77	C. teretis	3.31017		K. hunti	12.6346	0.406603
P40	700	378.5	392.346	C. teretis	3.14231		K. hunti	12.6486	0.412718
P9	1400	262.25	239.979	C. wuellerstorfi	3.45764		K. hunti	12.6989	0.434799
P9	1400	139.25	106.296	C. wuellerstorfi	3.51687		K. hunti	12.7325	0.449572
P40	700	380.5	393.791	C. teretis	3.08327		K. hunti	12.7359	0.451067
HLY-18TC	2598	30.5	30.3	C.wuellerstorfi	3.726		hunti	12.9124	0.528533
P40	700	141	111.592	C. teretis	3.37519		K. hunti	12.9327	0.537462
P9	1400	381.75	328.28	C. teretis	3.56268		K. hunti	13.1057	0.613409
P40	700	4	6.4582	C. teretis	3.21091		K. hunti	13.1141	0.617102
P40	700	384.5	396.681	C. teretis	2.94857		K. hunti	13.1513	0.633403
P9	1400	244.25	217.23	C. wuellerstorfi	3.7031		K. hunti	13.1558	0.635387
P21	1470	222.5	408.162	C. teretis	3.26513		K. hunti	13.2094	0.658914
HLY-18TC	2598	18.5	12.802	C.wuellerstorfi	3.687		hunti	13.2718	0.686328
P21	1470	228.5	424.117	C. teretis	3.54552		K. hunti	13.3081	0.702236
P9	1400	330.75	308.466	C. wuellerstorfi	3.44444		K. hunti	13.318	0.706584
P9	1400	143.75	109.6	C. wuellerstorfi	3.57687		K. hunti	13.4708	0.773679
P9	1400	321.75	304.97	C. wuellerstorfi	3.79223		K. hunti	13.4963	0.784858
P40	700	188	170.095	C. teretis	3.00916		K. hunti	13.499	0.78608
P40	700	344	367.42	C. teretis	3.4407		K. hunti	13.5281	0.798845
P21	1470	212.5	381.57	C. teretis	3.5327		K. hunti	13.5286	0.799067
P30	765	594	399.523	C. teretis	3.2651		K. hunti	13.5308	0.800008
P9	1400	318.75	303.804	C. wuellerstorfi	3.51132		K. hunti	13.5501	0.808495
P39	1470	225	316.202	C. teretis	2.8815		K. hunti	13.6	0.8304
HLY-18TC	2598	29.5	27.322	C.wuellerstorfi	3.912		hunti	13.6504	0.852546
P40	700	351	372.478	C. teretis	2.88502		K. hunti	13.7496	0.896077
P9	1400	332.25	309.049	C. wuellerstorfi	3.42113		K. hunti	13.8158	0.925117
P9	1400	177.75	133.187	C. teretis	3.3707		K. hunti	13.9349	0.9774
P21	1470	171.5	272.543	C. teretis	3.41978		K. hunti	13.9577	0.987426
P40	700	114	90.8722	C. teretis	3.3464		K. hunti	13.9865	1.00006
P40	700	374.5	389.456	C. teretis	2.816		K. hunti	14.0018	1.00677
P9	1400	327.75	307.301	C. wuellerstorfi	3.62696		K. hunti	14.0352	1.02147
P9	1400	144.75	110.334	C. wuellerstorfi	3.61605		K. hunti	14.3386	1.15463
HLY-18TC	2598	26.5	13.698	C.wuellerstorfi	3.72		hunti	14.3552	1.16194
P21	1470	208.5	370.933	C. teretis	3.25921		K. hunti	14.3586	1.16342
B17	2217	26.5	40.621	C.wuellerstorfi	3.478		hunti	14.6831	1.30589
P40	700	111	88.57	C. teretis	3.57479		K. hunti	14.9024	1.40214
P21	1470	224.5	413.48	C. teretis	3.58137		K. hunti	15.1557	1.51336
P40	700	225	247.55	C. teretis	3.28442		K. hunti	15.2083	1.53645
P40	700	358	377.535	C. teretis	3.26786		K. hunti	15.2139	1.5389
P21	1470	226.5	418.799	C. teretis	3.51096		K. hunti	15.233	1.54727
P9	1400	44.75	36.9144	C. wuellerstorfi	3.69507		K. hunti	15.2705	1.56375
P9	1400	242.75	215.334	C. wuellerstorfi	3.53178		K. hunti	15.2858	1.57049
P40	700	262	308.175	C. teretis	2.95414		K. hunti	16.3254	2.02687
P40	700	255	303.118	C. teretis	3.2074		K. hunti	16.5498	2.12534
B17	2217	30.5	42.523	C.wuellerstorfi	3.418		hunti	16.7113	2.19626
B17	2217	29.5	42.109	C.wuellerstorfi	3.432		hunti	16.8867	2.27326
B8	1031	35.5	42.07	C.wuellerstorfi	3.865		hunti	16.9121	2.28441
B17	2217	31.5	42.856	C.wuellerstorfi	3.571		hunti	16.9363	2.29505
P9	1400	178.75	134.451	C. teretis	3.23749		K. hunti	17.482	2.5346
P9	1400	328.75	307.689	C. wuellerstorfi	3.5647		K. hunti	17.8535	2.69768
P21	1470	97.5	108.497	C. wuellerstorfi	3.39886		K. hunti	17.87	2.70493
B17	2217	36.5	44.517	C.wuellerstorfi	3.608		hunti	18.4175	2.94529
B17	2217	25.5	40.125	C.wuellerstorfi	3.46		hunti	18.4344	2.95268
P40	700	218	232.382	C. teretis	3.38208		K. hunti	18.5228	2.99151
B17	2217	32.5	43.188	C.wuellerstorfi	3.432		hunti	18.7117	3.07445
B17	2217	35.5	44.185	C.wuellerstorfi	4.26		hunti	18.7508	3.09161
B17	2217	34.5	43.853	C.wuellerstorfi	3.526		hunti	18.7537	3.09287
P9	1400	329.25	307.884	C. wuellerstorfi	3.51628		K. hunti	19.1003	3.24502
P40	700	144	113.894	C. teretis	3.47714		K. hunti	19.1205	3.25391
B17	2217	33.5	43.521	C.wuellerstorfi	3.586		hunti	19.1282	3.25726
P39	1470	126	104.487	C. teretis	4.04892		K. hunti	21.2	4.1668

## Sheet: Figure 6
Panel a: Two component mixture: modern AODW with ice shelf					Panel b: LeGrande & Schmidt 2006 Deep Arctic d18O-S
f_fw	d18O-ice -20‰	d18O-ice -40‰			S	d18Osw
0	0.26	0.26			35.9	0.996
0.01	0	0			35.8	0.912
0.02	0	0			35.7	0.828
0.03	0	0			35.6	0.744
0.04	0	0			35.5	0.66
0.05	0	0			35.4	0.576
0.06	0	0			35.3	0.492
0.07	0	0			35.2	0.408
0.08	0	0			35.1	0.324
0.09	0	0			35	0.24
0.1	0	0			34.9	0.156
0.11	0	0			34.8	0.072
0.12	0	0			34.7	-0.012
0.13	0	0			34.6	-0.096
0.14	0	0			34.5	-0.18
0.15	0	0			34.4	-0.264
0.16	0	0			34.3	-0.348
0.17	0	0			34.2	-0.432
0.18	0	0			34.1	-0.516
0.19	0	0			34	-0.6
0.2	0	0			33.9	-0.684
0.21	0	0			33.8	-0.768
0.22	0	0			33.7	-0.852
0.23	0	0			33.6	-0.936
0.24	0	0			33.5	-1.02
0.25	0	0			33.4	-1.104
0.26	0	0			33.3	-1.188
0.27	0	0			33.2	-1.272
0.28	0	0			33.1	-1.356
0.29	0	0			33	-1.44
0.3	0	0			32.9	-1.524
0.31	0	0			32.8	-1.608
0.32	0	0			32.7	-1.692
0.33	0	0			32.6	-1.776
0.34	0	0			32.5	-1.86
0.35	0	0			32.4	-1.944
0.36	0	0			32.3	-2.028
0.37	0	0			32.2	-2.112
0.38	0	0			32.1	-2.196
0.39	0	0			32	-2.28
0.4	0	0			31.9	-2.364
0.41	0	0			31.8	-2.448
0.42	0	0			31.7	-2.532
0.43	0	0			31.6	-2.616
0.44	0	0			31.5	-2.7
0.45	0	0			31.4	-2.784
0.46	0	0			31.3	-2.868
0.47	0	0			31.2	-2.952
0.48	0	0			31.1	-3.036
0.49	0	0			31	-3.12
0.5	0	0			30.9	-3.204
0.51	0	0			30.8	-3.288
0.52	0	0			30.7	-3.372
0.53	0	0			30.6	-3.456
0.54	0	0			30.5	-3.54
0.55	0	0			30.4	-3.624
0.56	0	0			30.3	-3.708
0.57	0	0			30.2	-3.792
0.58	0	0			30.1	-3.876
0.59	0	0			30	-3.96
0.6	0	0			29.9	-4.044
0.61	0	0			29.8	-4.128
0.62	0	0			29.7	-4.212
0.63	0	0			29.6	-4.296
0.64	0	0			29.5	-4.38
0.65	0	0			29.4	-4.464
0.66	0	0			29.3	-4.548
0.67	0	0			29.2	-4.632
0.68	0	0			29.1	-4.716
0.69	0	0			29	-4.8
0.7	0	0			28.9	-4.884
0.71	0	0			28.8	-4.968
0.72	0	0			28.7	-5.052
0.73	0	0			28.6	-5.136
0.74	0	0			28.5	-5.22
0.75	0	0			28.4	-5.304
0.76	0	0			28.3	-5.388
0.77	0	0			28.2	-5.472
0.78	0	0			28.1	-5.556
0.79	0	0			28	-5.64
0.8	0	0			27.9	-5.724
0.81	0	0			27.8	-5.808
0.82	0	0			27.7	-5.892
0.83	0	0			27.6	-5.976
0.84	0	0			27.5	-6.06
0.85	0	0			27.4	-6.144
0.86	0	0			27.3	-6.228
0.87	0	0			27.2	-6.312
0.88	0	0			27.1	-6.396
0.89	0	0			27	-6.48
0.9	0	0			26.9	-6.564
0.91	0	0			26.8	-6.648
0.92	0	0			26.7	-6.732
0.93	0	0			26.6	-6.816
0.94	0	0			26.5	-6.9
0.95	0	0			26.4	-6.984
0.96	0	0			26.3	-7.068
0.97	0	0			26.2	-7.152
0.98	0	0			26.1	-7.236
0.99	0	0			26	-7.32
1	0	0			25.9	-7.404
					25.8	-7.488
					25.7	-7.572
					25.6	-7.656
					25.5	-7.74
					25.4	-7.824
					25.3	-7.908
					25.2	-7.992
					25.1	-8.076
					25	-8.16
					24.9	-8.244
					24.8	-8.328
					24.7	-8.412
					24.6	-8.496
					24.5	-8.58
					24.4	-8.664
					24.3	-8.748
					24.2	-8.832
					24.1	-8.916
					24	-9
					23.9	-9.084
					23.8	-9.168
					23.7	-9.252
					23.6	-9.336
					23.5	-9.42
					23.4	-9.504
					23.3	-9.588
					23.2	-9.672
					23.1	-9.756
					23	-9.84
					22.9	-9.924
					22.8	-10.008
					22.7	-10.092
					22.6	-10.176
					22.5	-10.26
					22.4	-10.344
					22.3	-10.428
					22.2	-10.512
					22.1	-10.596
					22	-10.68
					21.9	-10.764
					21.8	-10.848
					21.7	-10.932
					21.6	-11.016
					21.5	-11.1
					21.4	-11.184
					21.3	-11.268
					21.2	-11.352
					21.1	-11.436
					21	-11.52
					20.9	-11.604
					20.8	-11.688
					20.7	-11.772
					20.6	-11.856
					20.5	-11.94
					20.4	-12.024
					20.3	-12.108
					20.2	-12.192
					20.1	-12.276
					20	-12.36
					19.9	-12.444
					19.8	-12.528
					19.7	-12.612
					19.6	-12.696
					19.5	-12.78
					19.4	-12.864
					19.3	-12.948
					19.2	-13.032
					19.1	-13.116
					19	-13.2
					18.9	-13.284
					18.8	-13.368
					18.7	-13.452
					18.6	-13.536
					18.5	-13.62
					18.4	-13.704
					18.3	-13.788
					18.2	-13.872
					18.1	-13.956
					18	-14.04
					17.9	-14.124
					17.8	-14.208
					17.7	-14.292
					17.6	-14.376
					17.5	-14.46
					17.4	-14.544
					17.3	-14.628
					17.2	-14.712
					17.1	-14.796
					17	-14.88
					16.9	-14.964
					16.8	-15.048
					16.7	-15.132
					16.6	-15.216
					16.5	-15.3
					16.4	-15.384
					16.3	-15.468
					16.2	-15.552
					16.1	-15.636
					16	-15.72
					15.9	-15.804
					15.8	-15.888
					15.7	-15.972
					15.6	-16.056
					15.5	-16.14
					15.4	-16.224
					15.3	-16.308
					15.2	-16.392
					15.1	-16.476
					15	-16.56
					14.9	-16.644
					14.8	-16.728
					14.7	-16.812
					14.6	-16.896
					14.5	-16.98
					14.4	-17.064
					14.3	-17.148
					14.2	-17.232
					14.1	-17.316
					14	-17.4
					13.9	-17.484
					13.8	-17.568
					13.7	-17.652
					13.6	-17.736
					13.5	-17.82
					13.4	-17.904
					13.3	-17.988
					13.2	-18.072
					13.1	-18.156
					13	-18.24
					12.9	-18.324
					12.8	-18.408
					12.7	-18.492
					12.6	-18.576
					12.5	-18.66
					12.4	-18.744
					12.3	-18.828
					12.2	-18.912
					12.1	-18.996
					12	-19.08
					11.9	-19.164
					11.8	-19.248
					11.7	-19.332
					11.6	-19.416
					11.5	-19.5
					11.4	-19.584
					11.3	-19.668
					11.2	-19.752
					11.1	-19.836
					11	-19.92
					10.9	-20.004
					10.8	-20.088
					10.7	-20.172
					10.6	-20.256
					10.5	-20.34
					10.4	-20.424
					10.3	-20.508
					10.2	-20.592
					10.1	-20.676
					10	-20.76
					9.9	-20.844
					9.8	-20.928
					9.7	-21.012
					9.6	-21.096
					9.5	-21.18
					9.4	-21.264
					9.3	-21.348
					9.2	-21.432
					9.1	-21.516
					9	-21.6
					8.9	-21.684
					8.8	-21.768
					8.7	-21.852
					8.6	-21.936
					8.5	-22.02
					8.4	-22.104
					8.3	-22.188
					8.2	-22.272
					8.1	-22.356
					8	-22.44
					7.9	-22.524
					7.8	-22.608
					7.7	-22.692
					7.6	-22.776
					7.5	-22.86
					7.4	-22.944
					7.3	-23.028
					7.2	-23.112
					7.1	-23.196
					7	-23.28
					6.9	-23.364
					6.8	-23.448
					6.7	-23.532
					6.6	-23.616
					6.5	-23.7
					6.4	-23.784
					6.3	-23.868
					6.2	-23.952
					6.1	-24.036
					6	-24.12
					5.9	-24.204
					5.8	-24.288
					5.7	-24.372
					5.6	-24.456
					5.5	-24.54
					5.4	-24.624
					5.3	-24.708
					5.2	-24.792
					5.1	-24.876
					5	-24.96
					4.9	-25.044
					4.8	-25.128
					4.7	-25.212
					4.6	-25.296
					4.5	-25.38
					4.4	-25.464
					4.3	-25.548
					4.2	-25.632
					4.1	-25.716
					4	-25.8
					3.9	-25.884
					3.8	-25.968
					3.7	-26.052
					3.6	-26.136
					3.5	-26.22
					3.4	-26.304
					3.3	-26.388
					3.2	-26.472
					3.1	-26.556
					3	-26.64
					2.9	-26.724
					2.8	-26.808
					2.7	-26.892
					2.6	-26.976
					2.5	-27.06
					2.4	-27.144
					2.3	-27.228
					2.2	-27.312
					2.1	-27.396
					2	-27.48
					1.9	-27.564
					1.8	-27.648
					1.7	-27.732
					1.6	-27.816
					1.5	-27.9
					1.4	-27.984
					1.3	-28.068
					1.2	-28.152
					1.1	-28.236
					1	-28.32
					0.9	-28.404
					0.8	-28.488
					0.7	-28.572
					0.6	-28.656
					0.5	-28.74
					0.4	-28.824
					0.3	-28.908
					0.2	-28.992
					0.1	-29.076
					0	-29.16

## Sheet: Figure 7-8
Geibert et al. (2021) Th				Figure 8	Figure 7						Spielhagen et al. (2004) planktonic foram abundance			Figure 8	Figure 7			Haley et al. (2008) eNd		Figure 8	Figure 7
Core	Depth [m]	Depth comp [mcd]	depth comp (cmcd)	Age (Spielhagen04)	Age (Geibert21)	sed rate (cm/ka)	230Th xs [dpm/g]	230Th xs std dev [¬±]	(234U/238U)		Core	Depth [m]	Depth comp [mcd]	Age (Spielhagen04)	Age (Geibert21)	PF (#/g)		core	depth comp [m]	Age (Spielhagen04)	Age (Geibert21)	e-Nd
PS2185-3	0	0	0	2.3	2	0.625	7.62	0.37	0.85		PS2185-3		0.005	2.56	2.8	4117		PS2185-3	0.03	5	6.8	-10.8
PS2185-3	0.025	0.025	2.5	4.62	5.96825	0.625	5.71	0.32	0.89		PS2185-3		0.015	2.82	4.4	3971		PS2185-3	0.08	9	14.8	-10.8
PS2185-3	0.075	0.075	7.5	8.86	13.9048	0.625	5.5	0.28	0.93		PS2185-3		0.025	4.62	6	2089		PS2185-3	0.1	13	18	-10.5
PS2185-3	0.125	0.125	12.5	18.27	21.8413	0.625	9.42	0.38	0.87		PS2185-3		0.035	5.08	7.6	1705		PS2185-3	0.12	17	21.2	-11
PS2185-3	0.175	0.175	17.5	35.7	29.7778	0.625	5.2	0.32	1.04		PS2185-3		0.045	5.53	9.2	2523		PS2185-3	0.16	32	27.6	-10.7
PS2185-3	0.225	0.225	22.5	41.16	37.7143	0.625	3.4	0.39	0.95		PS2185-3		0.055	6.43	10.8	1116		PS2185-3	0.21	39	35.6	-10.7
PS2185-3	0.275	0.275	27.5	47.47	45.6508	0.625	1.39	0.26	0.88		PS2185-3		0.065	7.33	12.4	1605		PS2185-3	0.26	46	43.6	-10.6
PS2185-6	0.265	0.325	32.5	50.5	53.5873	0.625	0.76	0.32	0.8		PS2185-3		0.075	8.86	14	551		PS2185-3	0.31	50	51.6	-7.8
PS2185-6	0.315	0.375	37.5	51	62	3.75	0.2	0.3	0.89		PS2185-3		0.085	9.35	15.6	455		PS2185-3	0.36	51	59.6	-7.4
PS2185-6	0.365	0.425	42.5	51.6275	63.3333	3.75	0.04	0.25	1.06		PS2185-3		0.095	11.76	17.2	525		PS2185-6	0.49	52	65.3	-8.5
PS2185-6	0.415	0.475	47.5	52.2525	64.6667	3.75	0.06	0.34	0.89		PS2185-3		0.105	13.8	18.8	298		PS2185-6	0.59	54	67.6	-8.9
PS2185-6	0.465	0.525	52.5	52.7	66	3.75	0.2	0.28	0.98		PS2185-3		0.115	15.84	20.4	550		PS2185-6	0.75	56	94.3333	-8.4
PS2185-6	0.515	0.575	57.5	53.7	67.3333	3.75	0.48	0.31	0.95		PS2185-3		0.125	18.27	22	396		PS2185-6	0.95	60	136.1	-7.3
PS2185-6	0.565	0.625	62.5	54.4375	68.6667	3.75	0.16	0.34	0.95		PS2185-3		0.135	21.43	23.6	423		PS2185-6	1.19	65	151.5	-8.2
PS2185-6	0.615	0.675	67.5	55.0625	70	0.311475	0.24	0.39	1.01		PS2185-3		0.145	27.18	25.2	376		PS2185-6	1.29	68	157.5	-8.6
PS2185-6	0.665	0.725	72.5	55.6875	86.129	0.311475	1.24	0.3	0.98		PS2185-3		0.155	29.67	26.8	912		PS2185-6	1.41	70	165.7	-8
PS2185-6	0.71	0.77	77	56.4	100.645	0.311475	0.91	0.17	0.99		PS2185-3		0.165	34.87	28.4	563		PS2185-6	1.51	72	171.7	-9.1
PS2185-6	0.755	0.815	81.5	57.3	115.161	0.311475	0.31	0.19	0.82		PS2185-3		0.175	35.7	30	1246		PS2185-6	1.67	76	182.3	-9.4
PS2185-6	0.805	0.865	86.5	58.3	131	1.57895	0.02	0.37	0.94		PS2185-3		0.185	36.54	31.6	1455		PS2185-6	1.75	78	187.1	-9.8
PS2185-6	0.855	0.915	91.5	59.3	134.165	1.57895	-0.12	0.23	0.98		PS2185-3		0.195	37.37	33.2	1655		PS2185-6	2.11	96		-9.7
PS2185-6	0.905	0.965	96.5	60.3125	137.329	1.57895	0.36	0.19	0.95		PS2185-3		0.205	38.63	34.8	2143		PS2185-6	2.27	110		-9.6
PS2185-6	0.955	1.015	101.5	61.3542	140.494	1.57895	0.2	0.22	0.85		PS2185-3		0.215	39.9	36.4	2888		PS2185-6	2.41	122		-10.3
PS2185-6	1.005	1.065	106.5	62.3958	143.658	1.57895	-0.1	0.22	0.89		PS2185-3		0.225	41.16	38	1686		PS2185-6	2.62	142		-5.3
PS2185-6	1.055	1.115	111.5	63.4375	146.823	1.57895	0.56	0.23	0.83		PS2185-3		0.235	42.42	39.6	2212		PS2185-6	2.78	156		-6.5
PS2185-6	1.105	1.165	116.5	64.4792	150	1.58	0.19	0.23	0.98		PS2185-3		0.245	43.69	41.2	1574		PS2185-6	3.07	185		-6.8
PS2185-6	1.155	1.215	121.5	65.75	153.165		0.87	0.24	0.84		PS2185-3		0.255	44.95	42.8	675		PS2185-6	3.21	192		-9.9
PS2185-6	1.205	1.265	126.5	67.25	156.329		1.29	0.26	0.88		PS2185-3		0.265	46.21	44.4	689		PS2185-6	3.47	225		-10.1
PS2185-6	1.255	1.315	131.5	68.4167	159.494		1.1	0.26	0.86		PS2185-3		0.275	47.47	46	438		PS2185-6	3.59	243		-10
PS2185-6	1.305	1.365	136.5	69.25	162.658		0.39	0.36	0.8		PS2185-3		0.285	48.74	47.6	151		PS2185-6	3.67	273		-9.8
PS2185-6	1.355	1.415	141.5	70.1	165.823		0.53	0.15	0.91		PS2185-3		0.295	50	49.2	0		PS2185-6	3.7	284		-8.9
PS2185-6	1.405	1.465	146.5	71.1	168.987		0.43	0.19	0.97		PS2185-3		0.305	50.13	50.8	0		PS2185-6	3.73	295		-7.8
PS2185-6	1.455	1.515	151.5	72.125	172.152		0.69	0.26	0.93		PS2185-3		0.315	50.25	52.4	0		PS2185-6	3.79	312		-8.5
PS2185-6	1.505	1.565	156.5	73.375	175.316		0.23	0.23	0.86		PS2185-3		0.325	50.38	54	0		PS2185-6	3.95	329		-10.1
PS2185-6	1.555	1.615	161.5	74.625	178.481		0.22	0.21	0.89		PS2185-3		0.335	50.5	55.6	0		PS2185-6	4.35	370		-8
PS2185-6	1.605	1.665	166.5	75.875	181.646		0	0.25	1.01		PS2185-3		0.345	50.63	57.2	0		PS2185-6	4.67	422		-9.6
PS2185-6	1.655	1.715	171.5	77.125	184.81		-0.04	0.29	1.08		PS2185-3		0.355	50.75	58.8	0
PS2185-6	1.705	1.765	176.5	78.75	187.975		0.33	0.23	0.85		PS2185-3		0.365	50.88	60.4	0
PS2185-6	1.75	1.81	181	81	190.823		-0.03	0.29	0.94		PS2185-3		0.375	51	62	0
PS2185-6	1.805	1.865	186.5	83.75	194.304		0.25	0.39	1.01		PS2185-6	0.33	0.39	51.19	62.3	0
PS2185-6	1.86	1.92	192	86.5	197.785		-0.3	0.35	0.94		PS2185-6	0.35	0.41	51.44	62.7	16
PS2185-6	1.915	1.975	197.5	89.25			0.16	0.23	0.75		PS2185-6	0.37	0.43	51.69	63.2	0
PS2185-6	2.03	2.09	209	95			0.1	0.19	0.84		PS2185-6	0.39	0.45	51.94	64	0
PS2185-6	2.075	2.135	213.5	98.1875			0.17	0.23	0.86		PS2185-6	0.41	0.47	52.19	64.8	0
PS2185-6	2.125	2.185	218.5	102.562			-0.04	0.15	0.89		PS2185-6	0.43	0.49	52.44	65.3	0
PS2185-6	2.175	2.235	223.5	106.938			-0.16	0.17	0.9		PS2185-6	0.45	0.51	52.69	65.7	0
PS2185-6	2.225	2.285	228.5	111.286			-0.08	0.21	0.88		PS2185-6	0.47	0.53	52.94	66.1	0
PS2185-6	2.275	2.335	233.5	115.571			-0.09	0.19	0.86		PS2185-6	0.49	0.55	53.19	66.5	0
PS2185-6	2.325	2.385	238.5	119.857			-0.1	0.31	0.88		PS2185-6	0.51	0.57	53.45	66.9	0
PS2185-6	2.375	2.435	243.5	124.381			0.13	0.14	0.85		PS2185-6	0.53	0.59	53.7	67.6	0
PS2185-6	2.525	2.585	258.5	138.667			0.14	0.2	0.93		PS2185-6	0.55	0.61	53.95	68.4	0
PS2185-6	2.575	2.635	263.5	143.312			-0.17	0.31	0.88		PS2185-6	0.57	0.63	54.2	69.1	0
PS2185-6	2.625	2.685	268.5	147.688			0.22	0.14	0.95		PS2185-6	0.59	0.65	54.45	69.5	0
PS2185-6	2.675	2.735	273.5	152.062			-0.25	0.13	0.99		PS2185-6	0.61	0.67	54.7	69.9	0
PS2185-6	2.725	2.785	278.5	156.5			-0.09	0.13	0.89		PS2185-6	0.63	0.69	54.95	74.8	0
PS2185-6	2.775	2.835	283.5	161.5			0.63	0.13	0.58		PS2185-6	0.65	0.71	55.2	81.2	35
PS2185-6	2.875	2.935	293.5	171.5			0.1	0.2	0.92		PS2185-6	0.67	0.73	55.45	87.6667	0
PS2185-6	2.925	2.985	298.5	176.5			0.17	0.3	0.86		PS2185-6	0.69	0.75	55.89	94.3333	0
PS2185-6	2.975	3.035	303.5	181.5			-0.05	0.22	1.17		PS2185-6	0.71	0.77	56.32	101	0
PS2185-6	3.025	3.085	308.5	185.75			0.3	0.23	0.91		PS2185-6	0.73	0.79	56.76	107.222	0
PS2185-6	3.075	3.135	313.5	188.25			-0.09	0.22	0.93		PS2185-6	0.75	0.81	57.19	113.444	0
PS2185-6	3.125	3.185	318.5	190.75			-0.02	0.26	0.98		PS2185-6	0.77	0.83	57.63	119.8	0
PS2185-6	3.175	3.235	323.5	195.173			0.04	0.24	0.97		PS2185-6	0.79	0.85	58.07	126.2	0
PS2185-6	3.225	3.285	328.5	201.519			0.3	0.21	0.89		PS2185-6	0.81	0.87	58.5	131.3	0
PS2185-6	3.275	3.335	333.5	207.865			0.28	0.2	0.77		PS2185-6	0.83	0.89	58.94	132.5	0
PS2185-6	3.325	3.385	338.5	214.212			0.06	0.28	0.78		PS2185-6	0.85	0.91	59.38	133.7	0
PS2185-6	3.375	3.435	343.5	220.558			-0.17	0.23	0.93		PS2185-6	0.87	0.93	59.81	134.9	0
PS2185-6	3.425	3.485	348.5	227.25			-0.3	0.19	0.98		PS2185-6	0.89	0.95	60.25	136.1	0
PS2185-6	3.475	3.535	353.5	234.75			-0.2	0.29	1.1		PS2185-6	0.91	0.97	60.68	137.3	0
PS2185-6	3.525	3.585	358.5	242.25			0.02	0.27	1.02		PS2185-6	0.93	0.99	61.12	138.5	0
PS2185-6	3.575	3.635	363.5	259.875			0.35	0.24	0.89		PS2185-6	0.95	1.01	61.56	139.7	0
PS2185-6	3.625	3.685	368.5	278.5			-0.35	0.3	1.09		PS2185-6	0.97	1.03	61.99	141.2	0
PS2185-6	3.775	3.835	383.5	316.781			0.46	0.36	0.97		PS2185-6	0.99	1.05	62.43	142.8	0
PS2185-6	3.825	3.885	388.5	322.094			-0.54	0.3	1.04		PS2185-6	1.01	1.07	62.86	144.3	0
PS2185-6	3.875	3.935	393.5	327.406			0.08	0.31	0.89		PS2185-6	1.03	1.09	63.3	145.5	0
PS2185-6	3.925	3.985	398.5	332.587			0.3	0.31	0.83		PS2185-6	1.07	1.13	64.17	147.9	0
PS2185-6	3.975	4.035	403.5	337.712			0.03	0.21	0.91		PS2185-6	1.13	1.19	65.48	151.5	0
											PS2185-6	1.19	1.25	66.79	155.1	0
											PS2185-6	1.25	1.31	68.1	158.7	0
											PS2185-6	1.31	1.37	69.41	163.3	0
											PS2185-6	1.37	1.43	70.71	166.9	0
											PS2185-6	1.43	1.49	72.02	170.5	0
											PS2185-6	1.49	1.55	73.33	174.1	0
											PS2185-6	1.55	1.61	74.64	177.7	0
											PS2185-6	1.61	1.67	75.95	182.3	0
											PS2185-6	1.65	1.71	76.82	184.7	42
											PS2185-6	1.67	1.73	77.26	185.9	164
											PS2185-6	1.69	1.75	77.69	187.1	1261
											PS2185-6	1.71	1.77	78.13	188.333	1507
											PS2185-6	1.73	1.79	78.56	189.667	694
											PS2185-6	1.75	1.81	79	191	1374
											PS2185-6	1.77	1.83	80.13	192.091	430
											PS2185-6	1.79	1.85	81.25	193.182	428
											PS2185-6	1.81	1.87	82.38	194.364	40
											PS2185-6	1.84	1.9	84.06	196.545	0
											PS2185-6	1.9	1.96	87.44		0
											PS2185-6	1.92	1.98	88.84		47
											PS2185-6	1.95	2.01	90.25		347
											PS2185-6	1.97	2.03	91.38		477
											PS2185-6	1.99	2.05	92.5		2677
											PS2185-6	2.01	2.07	93.63		2400
											PS2185-6	2.03	2.09	94.75		1399
											PS2185-6	2.05	2.11	95.88		1842
											PS2185-6	2.07	2.13	97		2129
											PS2185-6	2.09	2.15	98.79		1431
											PS2185-6	2.11	2.17	100.57		3222
											PS2185-6	2.13	2.19	102.36		842
											PS2185-6	2.15	2.21	104.14		202
											PS2185-6	2.17	2.23	105.93		257
											PS2185-6	2.19	2.25	107.71		376
											PS2185-6	2.21	2.27	109.5		462
											PS2185-6	2.23	2.29	111.29		1335
											PS2185-6	2.25	2.31	113.07		1443
											PS2185-6	2.27	2.33	114.86		2636
											PS2185-6	2.29	2.35	116.64		4519
											PS2185-6	2.31	2.37	118.43		3156
											PS2185-6	2.33	2.39	120.21		3477
											PS2185-6	2.35	2.41	122		4529
											PS2185-6	2.37	2.43	123.92		2003
											PS2185-6	2.39	2.45	125.84		1282
											PS2185-6	2.41	2.47	127.76		47
											PS2185-6	2.43	2.49	129.68		68
											PS2185-6	2.45	2.51	131.6		0
											PS2185-6	2.47	2.53	133.52		108
											PS2185-6	2.49	2.55	135.44
											PS2185-6	2.5	2.56	136.88		0
											PS2185-6	2.56	2.62	141.68		0
											PS2185-6	2.7	2.76	156.08		0
											PS2185-6	2.76	2.82	160.88		0
											PS2185-6	2.79	2.85	164.24		0
											PS2185-6	2.81	2.87	166.16		15
											PS2185-6	2.83	2.89	168.08		0
											PS2185-6	2.85	2.91	170		0
											PS2185-6	2.87	2.93	171.92		0
											PS2185-6	2.89	2.95	173.84		0
											PS2185-6	2.91	2.97	175.76		0
											PS2185-6	2.93	2.99	177.68		0
											PS2185-6	2.95	3.01	179.6		0
											PS2185-6	2.97	3.03	181.52		0
											PS2185-6	2.99	3.05	183.44		0
											PS2185-6	3.01	3.07	185.36		0
											PS2185-6	3.03	3.09	187.28		0
											PS2185-6	3.05	3.11	189.2		12
											PS2185-6	3.07	3.13	191.12		0
											PS2185-6	3.09	3.15	193.04		92
											PS2185-6	3.11	3.17	194.95		221
											PS2185-6	3.13	3.19	196.85		162
											PS2185-6	3.17	3.23	200.65		0
											PS2185-6	3.23	3.29	206.35		0
											PS2185-6	3.29	3.35	212.05		0
